# Supplementary material for: Synthesis of indolo- and benzothieno[3,2-c]quinolines via POCl3 mediated tandem cyclization of o-alkynylisocyanobenzenes derived from o-alkynyl-N-phenylformamides
Source: Royal Society of Chemistry journal article supplement (doi:10.1039/d2nj02791g), 2022-01-01

## Supporting Information

### Synthesis of indolo- and benzothieno[3,2-*c*]quinolines *via* POCl<sub>3</sub> mediated tandem cyclization of *o*-alkynylisocyanobenzenes derived from *o*-alkynyl-*N*-phenylformamides

Thikhamporn Uppalabat,<sup>a</sup> Anyawan Tapdara,<sup>a</sup> Onnicha Khaikate,<sup>a</sup> Thanapat Worakul,<sup>a</sup> Panida Surawatanawong,<sup>a</sup> Pawaret Leowanawat,<sup>a</sup> Darunee Soorukram,<sup>a</sup> Vichai Reutrakul,<sup>a</sup> Jatuporn Meesin,<sup>b</sup> and Chutima Kuhakarn<sup>a,\*</sup>

<sup>a</sup> Department of Chemistry and Center of Excellence for Innovation in Chemistry (PERCH-CIC), Faculty of Science, Mahidol University, Rama 6 Road, Bangkok 10400, Thailand.

<sup>b</sup> Department of Chemistry, School of Science, King Mongkut's Institute of Technology Ladkrabang Chalongkrung Road Ladkrabang District Bangkok 10520, Thailand

E-mail: chutima.kon@mahidol.ac.th

#### List of Contents

|    |                                                                                                                                      |     |
|----|--------------------------------------------------------------------------------------------------------------------------------------|-----|
| 1  | General information                                                                                                                  | S2  |
| 2  | Preparation of formamides <b>1</b> and <b>4</b>                                                                                      | S3  |
| 3  | Preparation of 6-chloro-indolo[3,2- <i>c</i> ]quinolines <b>7</b> and 6-chloro-benzothieno[3,2- <i>c</i> ]quinolines <b>8</b>        | S5  |
| 4  | Characterization data of compounds <b>7–9</b>                                                                                        | S6  |
| 5  | Preparation of <b>10aa</b> , <b>10ab</b> , <b>10ac</b> , <b>10nb</b> , <b>10pb</b> , and <b>11aa</b> (Suzuki–Miyaura cross-coupling) | S20 |
| 6  | Preparation of <b>12aa</b> , <b>12ab</b> , <b>12ac</b> and <b>12na</b> (Heck cross-coupling)                                         | S21 |
| 7  | Preparation of 11-methyl-6-(piperidin-1-yl)-11 <i>H</i> -indolo[3,2- <i>c</i> ]quinoline ( <b>13a</b> )                              | S22 |
| 8  | Characterization data of compounds <b>10</b> , <b>11</b> and <b>13</b>                                                               | S23 |
| 9  | Photophysical properties of <b>7a</b> , <b>10ab</b> , <b>10nb</b> , <b>12aa</b> and <b>12na</b>                                      | S29 |
| 10 | Computation details                                                                                                                  | S32 |
| 11 | References                                                                                                                           | S40 |
| 12 | NMR spectra                                                                                                                          | S43 |

## 1. General information

$^1\text{H}$  NMR and  $^{13}\text{C}$  NMR spectra were recorded on a Bruker DPX-400, a Bruker Avance-500 or a JEOL-400 spectrometer using deuteriochloroform ( $\text{CDCl}_3$ ) or deuterated dimethyl sulfoxide ( $\text{DMSO-}d_6$ ) as the solvents. Chemical shifts for  $^1\text{H}$  and  $^{13}\text{C}$  NMR spectra were reported in parts per million (ppm,  $\delta$ ). The chemical shift of  $^1\text{H}$  NMR spectra is reported with reference to tetramethylsilane ( $\delta = 0.00$  ppm) as the internal reference, while the chemical shift of  $^{13}\text{C}$  NMR spectra is reported with reference to  $\text{CDCl}_3$  at 77.0 ppm or  $\text{DMSO-}d_6$  at 39.5 ppm. Coupling constants ( $J$ ) were reported in hertz (Hz). Infrared spectra were recorded on a Bruker ALPHA FT-IR spectrometer and only partial data were reported in  $\text{cm}^{-1}$ . High-resolution mass spectra (HRMS) were recorded on a Bruker micro TOF in the electrospray ionization (ESI) mode. Melting points were determined on a Buchi Melting Point M-565 apparatus. UV-vis spectra were recorded on an UV-vis spectrophotometer (Shimadzu UV-2600) and fluorescence spectra were recorded on a spectrofluorometer (Horiba FluoroMax4+, integration time 0.1 sec, slit width 3 nm). The fluorescence quantum yields were measured by comparing between solvents as a blank and sample according to this equation (original from Horiba with sphere cuvette correction):  $\Phi = \Delta \text{ Area under emission curve} / \Delta \text{ Area under absorption curve}$  the default mode for quantum yield measurement was set at integration time 1.0 sec, slit width 3–5 nm.

All chemicals and solvents were purchased and used without prior purification unless otherwise noted. Reactions were monitored by thin-layer chromatography (TLC) and visualized by UV. *N*-(2-Arylethynyl)phenyl)formamides (**1** or **4**) were synthesized according to literature procedures.<sup>1-2</sup> All reagents and solvents were obtained from commercial sources and used without further purification. Reactions were monitored by Thin-Layer Chromatography (TLC) using silica gel 60 PF<sub>254</sub> aluminum sheets. Column chromatography was performed using silica gel 60 (particle size 0.06–0.2 mm; 70–230 mesh ASTM).

## 2. Preparation of formamides **1** and **4**<sup>1-2</sup>

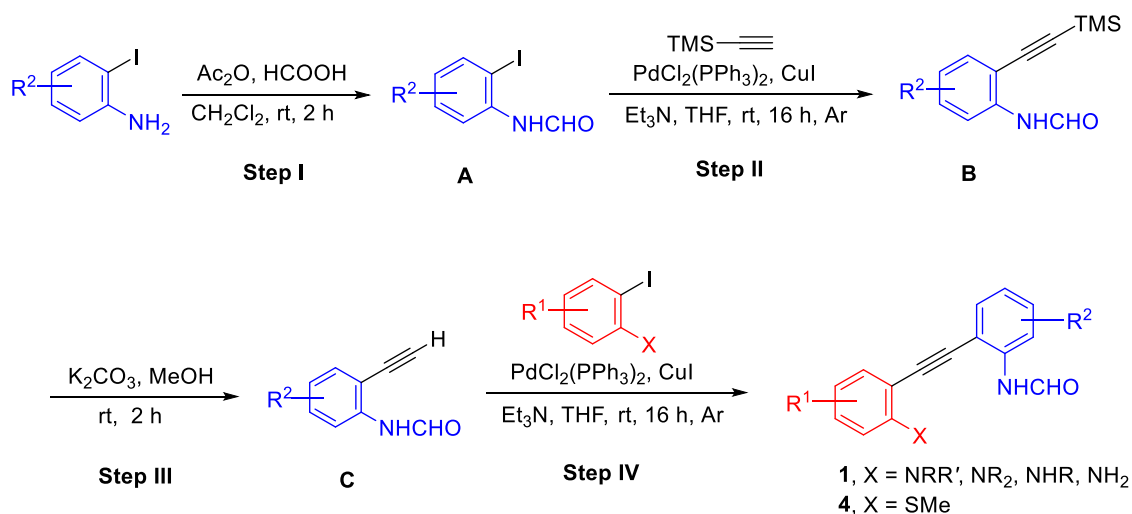

**Step I:** To a round-bottomed flask filled with formic acid (40.0 mmol, 4.0 equiv) was added  $\text{Ac}_2\text{O}$  (20.0 mmol, 2.0 equiv) at room temperature, and the resulting mixture was stirred for 10 minutes. To this mixture was added a solution of 2-iodoaniline derivative (10.0 mmol, 1.0 equiv) in  $\text{CH}_2\text{Cl}_2$  (40 mL), and then the reaction mixture was further stirred at room temperature for 2 h. The reaction was quenched with  $\text{H}_2\text{O}$  (20 mL) and the resulting mixture was extracted with  $\text{CH}_2\text{Cl}_2$  ( $3 \times 20$  mL). The combined organic layers were washed with brine (20 mL), dried (anh.  $\text{Na}_2\text{SO}_4$ ), filtered and concentrated under reduced pressure (aspirator) to yield the corresponding *N*-(2-iodoaryl)formamide derivative (**A**) which was used in the coupling reaction without prior purification.

**Step II:** To a two-necked flask containing **A** (10.0 mmol, 1.0 equiv),  $\text{PdCl}_2(\text{PPh}_3)_2$  (91.2 mg, 0.13 mmol, 0.013 equiv), and  $\text{CuI}$  (19.0 mg, 0.1 mmol, 0.01 equiv) was added  $\text{Et}_3\text{N}$  (10 mL) and  $\text{THF}$  (10 mL) at room temperature under argon atmosphere. Then, ethynyltrimethylsilane (11.0 mmol, 1.1 equiv) was added dropwise to the reaction mixture. The reaction was allowed to stir at room temperature under argon atmosphere for overnight (16 h). The reaction was quenched with saturated aqueous  $\text{NH}_4\text{Cl}$  (20 mL) and the resulting mixture was extracted with  $\text{EtOAc}$  ( $3 \times 20$  mL). The combined organic layers were washed with brine (20 mL), dried (anh.  $\text{Na}_2\text{SO}_4$ ), filtered and concentrated under reduced pressure (aspirator). The crude product was purified by column chromatography on silica gel using  $\text{EtOAc}$ /hexane as the eluent to afford the corresponding *N*-(2-((trimethylsilyl)ethynyl)phenyl)formamide derivative (**B**).

**Step III:** To a round-bottomed containing **B** (10.0 mmol, 1.0 equiv) and  $K_2CO_3$  (20.0 mmol, 2.0 equiv) was added MeOH (20 mL). Next, the reaction was stirred at room temperature for 2 h. The reaction was quenched with saturated aqueous  $NH_4Cl$  (20 mL) and the resulting mixture was extracted with EtOAc ( $3 \times 20$  mL). The combined organic layers were washed with brine (20 mL), dried (anh.  $Na_2SO_4$ ), filtered and concentrated under reduced pressure (aspirator) to provide the corresponding *N*-(2-ethynylphenyl)formamide derivative (**C**) which was used in the coupling reaction without prior purification.

**Step IV:** To a two-necked flask containing 2-iodoaniline derivative or (2-iodophenyl)(methyl) sulfane (10.0 mmol, 1.0 equiv),  $PdCl_2(PPh_3)_2$  (91.2 mg, 0.13 mmol, 0.013 equiv), and CuI (19.0 mg, 0.1 mmol, 0.01 equiv) was added  $Et_3N$  (10 mL) at room temperature under argon atmosphere. Next, a solution of **C** (11.0 mmol, 1.1 equiv) in THF (10.0 mL) was added dropwise to the reaction mixture. The reaction was allowed to stir at room temperature under argon atmosphere for overnight (16 h). The reaction was quenched with saturated aqueous  $NH_4Cl$  (20 mL) and the resulting mixture was extracted with EtOAc ( $3 \times 20$  mL). The combined organic layers were washed with brine (20 mL), dried (anh.  $Na_2SO_4$ ), filtered and concentrated under reduced pressure (aspirator). The crude product was purified by column chromatography on silica gel using EtOAc/hexane as the eluent to obtain the corresponding formamide (**1** or **4**).

### 3. Preparation of 6-chloro-indolo[3,2-*c*]quinolines **7** and 6-chloro-benzothieno[3,2-*c*]quinolines **8**

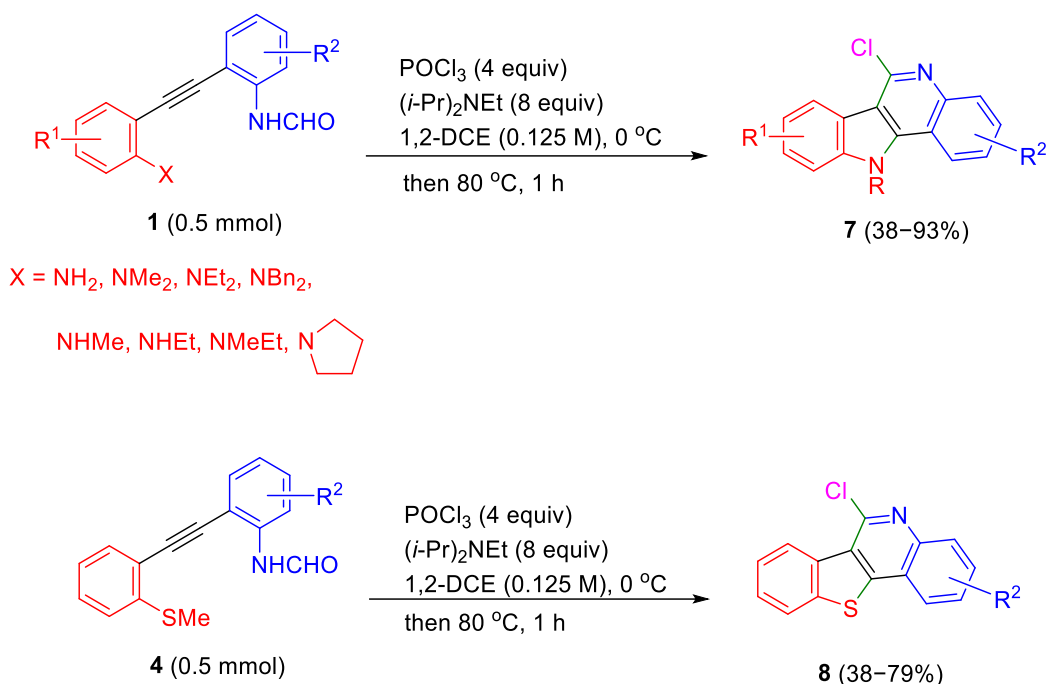

To a round-bottomed flask containing **1** or **4** (0.5 mmol, 1.0 equiv) in 1,2-dichloroethane (1,2-DCE) (4.0 mL, 0.125 M) was treated with (*i*-Pr)<sub>2</sub>NEt (4.0 mmol, 8.0 equiv) and POCl<sub>3</sub> (2.0 mmol, 4.0 equiv) at 0 °C. Next, the reaction mixture was stirred at 80 °C for 1 h. The reaction mixture was quenched with H<sub>2</sub>O (5 mL) and the residue was extracted with CH<sub>2</sub>Cl<sub>2</sub> (3 × 10 mL). The combined organic layers were washed with brine (20 mL), dried (anh. Na<sub>2</sub>SO<sub>4</sub>), filtered and concentrated under reduced pressure (aspirator). The crude product was purified by column chromatography on silica gel using acetone/hexane, CH<sub>2</sub>Cl<sub>2</sub>/hexane, or EtOAc/hexane as the eluent to provide the corresponding product **7** or **8**.

#### 4. Characterization data of compounds 7–9

##### 6-Chloro-11-methyl-11*H*-indolo[3,2-*c*]quinoline (**7a**)<sup>3</sup>

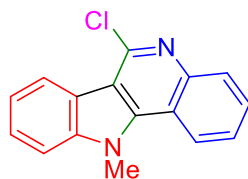

Prepared according to standard reaction conditions. Purification by column chromatography (SiO<sub>2</sub>, CH<sub>2</sub>Cl<sub>2</sub>/hexane, 2:3 v/v) to afford **7a** (102.4 mg, 77%) as a pale yellow solid; mp = 139.2–140.5 °C (CH<sub>2</sub>Cl<sub>2</sub>/hexane).

<sup>1</sup>H NMR (400 MHz, CDCl<sub>3</sub>): δ 8.59 (d, *J* = 7.6 Hz, 1H), 8.40 (d, *J* = 8.4 Hz, 1H), 8.11 (d, *J* = 8.8 Hz, 1H), 7.74 (td, *J* = 7.6, 1.2 Hz, 1H), 7.60 (t, *J* = 7.8 Hz, 1H), 7.53 (t, *J* = 7.6 Hz, 1H), 7.39 (d, *J* = 8.0 Hz, 1H), 7.33 (t, *J* = 7.6 Hz, 1H), 3.96 (s, 3H); <sup>13</sup>C NMR (100 MHz, CDCl<sub>3</sub>): δ 152.4, 146.9, 142.8, 135.6, 129.4, 128.5, 127.8, 124.2, 124.0, 123.6, 122.3, 120.3, 119.8, 115.6, 108.5, 27.8 ppm; IR (ATR): 3051, 2929, 1628, 1600, 1470, 1393, 745 cm<sup>-1</sup>; HRMS (ESI–TOF) *m/z*: [M+H]<sup>+</sup> calcd for C<sub>16</sub>H<sub>12</sub>ClN<sub>2</sub> 267.0684; found 267.0686.

##### 6-Chloro-8,11-dimethyl-11*H*-indolo[3,2-*c*]quinoline (**7b**)

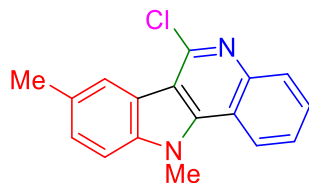

Prepared according to standard reaction conditions. Purification by column chromatography (SiO<sub>2</sub>, CH<sub>2</sub>Cl<sub>2</sub>/hexane, 2:3 v/v) to afford **7b** (96.7 mg, 65%) as a pale yellow solid; mp = 183.6–184.5 °C (CH<sub>2</sub>Cl<sub>2</sub>/hexane).

<sup>1</sup>H NMR (400 MHz, CDCl<sub>3</sub>): δ 8.40 (d, *J* = 6.8 Hz, 1H), 8.39 (s, 1H), 8.10 (d, *J* = 8.4 Hz, 1H), 7.74 (t, *J* = 7.6 Hz, 1H), 7.53 (t, *J* = 7.6 Hz, 1H), 7.42 (d, *J* = 8.0 Hz, 1H), 7.28 (d, *J* = 8.4 Hz, 1H), 3.94 (s, 3H), 2.57 (s, 3H); <sup>13</sup>C NMR (100 MHz, CDCl<sub>3</sub>): δ 152.6, 146.8, 140.9, 135.4, 129.8, 129.6, 129.3, 127.6, 124.3, 124.0, 123.5, 122.2, 119.8, 115.5, 108.2, 27.8, 21.5 ppm; IR (ATR): 3060, 2918, 1631, 1605, 1480, 1386, 746 cm<sup>-1</sup>; HRMS (ESI–TOF) *m/z*: [M+H]<sup>+</sup> calcd for C<sub>17</sub>H<sub>14</sub>ClN<sub>2</sub> 281.0840; found 281.0847.

### 6-Chloro-11-methyl-8-(trifluoromethyl)-11H-indolo[3,2-c]quinoline (7c)

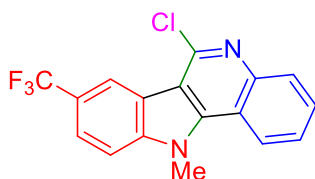

Prepared according to standard reaction conditions. Purification by column chromatography (SiO<sub>2</sub>, CH<sub>2</sub>Cl<sub>2</sub>/hexane, 2:3 v/v) to afford **7c** (148.4 mg, 87%) as an off white solid; mp = 161.8–162.7 °C (CH<sub>2</sub>Cl<sub>2</sub>/hexane).

<sup>1</sup>H NMR (400 MHz, CDCl<sub>3</sub>): δ 8.62 (s, 1H), 8.22 (d, *J* = 8.4 Hz, 1H), 7.98 (d, *J* = 8.4 Hz, 1H), 7.72–7.66 (m, 2H), 7.46 (t, *J* = 7.6 Hz, 1H), 7.24 (d, *J* = 8.4 Hz, 1H), 3.82 (s, 3H); <sup>13</sup>C NMR (100 MHz, CDCl<sub>3</sub>): δ 152.1, 146.9, 144.0, 136.1, 129.8, 127.8, 125.2 (q, *J*<sub>C,F</sub> = 3.4 Hz, CH), 124.9 (q, *J*<sub>C,F</sub> = 270.0 Hz, CF<sub>3</sub>), 124.1, 124.0, 122.6 (q, *J*<sub>C,F</sub> = 32.3 Hz, C), 122.1, 121.0 (q, *J*<sub>C,F</sub> = 3.9 Hz, CH), 119.2, 114.3, 108.3, 27.8 ppm; IR (ATR): 3045, 2921, 1634, 1610, 1480, 1388, 1242 (-CF<sub>3</sub>), 1151 (-CF), 753 cm<sup>-1</sup>; HRMS (ESI-TOF) *m/z*: [M+H]<sup>+</sup> calcd for C<sub>17</sub>H<sub>11</sub>ClF<sub>3</sub>N<sub>2</sub> 335.0557; found 335.0554.

### 6-Chloro-11-methyl-8-nitro-11H-indolo[3,2-c]quinoline (7d)

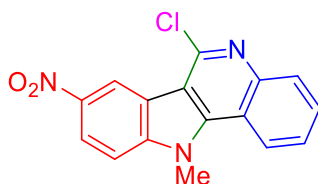

Prepared according to standard reaction conditions. Purification by column chromatography (SiO<sub>2</sub>, CH<sub>2</sub>Cl<sub>2</sub>/hexane, 3:2 v/v) to afford **7d** (71.7 mg, 46%) as a yellow solid; mp = 304.4–305.2 °C (CH<sub>2</sub>Cl<sub>2</sub>/hexane).

<sup>1</sup>H NMR (400 MHz, CDCl<sub>3</sub>): δ 9.45 (d, *J* = 2.0 Hz, 1H), 8.54 (dd, *J* = 9.0, 2.2 Hz, 1H), 8.44 (d, *J* = 8.4 Hz, 1H), 8.16 (d, *J* = 8.8 Hz, 1H), 7.83 (td, *J* = 7.6, 1.2 Hz, 1H), 7.63 (td, *J* = 7.6, 0.8 Hz, 1H), 7.46 (d, *J* = 9.2 Hz, 1H), 4.05 (s, 3H); <sup>13</sup>C NMR (100 MHz, CDCl<sub>3</sub>): δ 152.8, 147.5, 146.2, 141.6, 137.2, 130.5, 128.2, 124.9, 124.5, 124.3, 122.7, 120.3, 119.7, 114.7, 108.2, 28.3 ppm; IR (ATR): 3067, 2921, 1637, 1603, 1488 (-NO), 1471, 1390, 1320 (-NO), 754 cm<sup>-1</sup>; HRMS (ESI-TOF) *m/z*: [M+Na]<sup>+</sup> calcd for C<sub>16</sub>H<sub>10</sub>ClN<sub>3</sub>O<sub>2</sub>Na 334.0354; found 334.0355.

### 6-Chloro-8-fluoro-11-methyl-11H-indolo[3,2-c]quinoline (7e)

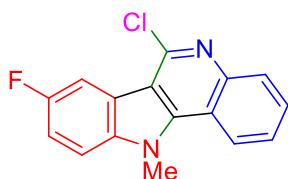

Prepared according to standard reaction conditions. Purification by column chromatography (SiO<sub>2</sub>, CH<sub>2</sub>Cl<sub>2</sub>/hexane, 2:3 v/v) to afford **7e** (92.4 mg, 59%) as a pale yellow solid; mp = 180.5–181.7 °C (CH<sub>2</sub>Cl<sub>2</sub>/hexane).

<sup>1</sup>H NMR (400 MHz, CDCl<sub>3</sub>): δ 8.37 (d, *J* = 8.4 Hz, 1H), 8.25 (dd, *J* = 8.8, 2.0 Hz, 1H), 8.09 (d, *J* = 8.4 Hz, 1H), 7.75 (td, *J* = 7.6, 1.2 Hz, 1H), 7.53 (t, *J* = 7.6 Hz, 1H), 7.36–7.27 (m, 2H), 3.94 (s, 3H); <sup>13</sup>C NMR (100 MHz, CDCl<sub>3</sub>): δ 157.6 (d, *J*<sub>C,F</sub> = 235.6 Hz, CF), 152.6, 147.2, 138.9, 136.1, 129.8, 127.7, 124.1, 123.8, 122.0, 120.1 (d, *J*<sub>C,F</sub> = 9.8 Hz, C), 115.9 (d, *J*<sub>C,F</sub> = 24.8 Hz, CH), 115.1, 110.4 (d, *J*<sub>C,F</sub> = 25.3 Hz, CH), 108.9 (d, *J*<sub>C,F</sub> = 8.8 Hz, CH), 27.9 ppm; IR (ATR): 3031, 2921, 1630, 1609, 1479, 1382, 1114 (-CF), 752 cm<sup>-1</sup>; HRMS (ESI-TOF) *m/z*: [M+H]<sup>+</sup> calcd for C<sub>16</sub>H<sub>11</sub>ClFN<sub>2</sub> 285.0589; found 285.0591.

### 6,8-Dichloro-11-methyl-11H-indolo[3,2-c]quinoline (7f)

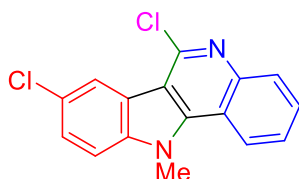

Prepared according to standard reaction conditions. Purification by column chromatography (SiO<sub>2</sub>, CH<sub>2</sub>Cl<sub>2</sub>/hexane, 2:3 v/v) to afford **7f** (96.5 mg, 58%) as a pale yellow solid; mp = 195.4–196.7 °C (CH<sub>2</sub>Cl<sub>2</sub>/hexane).

<sup>1</sup>H NMR (400 MHz, CDCl<sub>3</sub>): δ 8.46 (d, *J* = 2.0 Hz, 1H), 8.33 (d, *J* = 8.4 Hz, 1H), 8.06 (d, *J* = 8.4 Hz, 1H), 7.73 (td, *J* = 7.7, 1.0 Hz, 1H), 7.53–7.48 (m, 2H), 7.23 (d, *J* = 8.4 Hz, 1H), 3.89 (s, 3H); <sup>13</sup>C NMR (100 MHz, CDCl<sub>3</sub>): δ 152.2, 147.1, 140.9, 136.1, 129.8, 128.4, 127.8, 125.7, 124.1, 123.9, 123.6, 122.1, 120.6, 114.5, 109.3, 27.9 ppm; IR (ATR): 3045, 2918, 1633, 1601, 1472, 1387, 752 cm<sup>-1</sup>; HRMS (ESI-TOF) *m/z*: [M+H]<sup>+</sup> calcd for C<sub>16</sub>H<sub>11</sub>Cl<sub>2</sub>N<sub>2</sub> 301.0294; found 301.0296.



### 8-Bromo-6-chloro-11-methyl-11H-indolo[3,2-c]quinoline (7g)

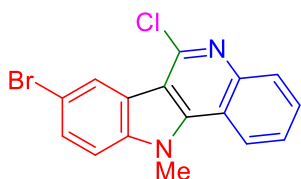

Prepared according to standard reaction conditions. Purification by column chromatography (SiO<sub>2</sub>, CH<sub>2</sub>Cl<sub>2</sub>/hexane, 2:3 v/v) to afford **7g** (103.5 mg, 54%) as a pale yellow solid; mp = 205.9–206.8 °C (CH<sub>2</sub>Cl<sub>2</sub>/hexane).

<sup>1</sup>H NMR (400 MHz, CDCl<sub>3</sub>): δ 8.56 (s, 1H), 8.30 (d, *J* = 8.4 Hz, 1H), 8.04 (d, *J* = 8.4 Hz, 1H), 7.72 (t, *J* = 7.6 Hz, 1H), 7.61 (d, *J* = 8.4 Hz, 1H), 7.50 (t, *J* = 7.6 Hz, 1H), 7.15 (d, *J* = 8.8 Hz, 1H), 3.86 (s, 3H); <sup>13</sup>C NMR (100 MHz, CDCl<sub>3</sub>): δ 152.0, 147.0, 141.1, 136.1, 131.0, 129.8, 127.7, 126.5, 124.0, 123.9, 122.1, 121.1, 114.3, 112.9, 109.8, 27.8 ppm; IR (ATR): 3073, 2919, 1631, 1598, 1470, 1383, 751, 627 cm<sup>-1</sup>; HRMS (ESI–TOF) *m/z*: [M+H]<sup>+</sup> calcd for C<sub>16</sub>H<sub>11</sub>BrClN<sub>2</sub> 346.9768; found 346.9763.

### 6,9-Dichloro-11-methyl-11H-indolo[3,2-c]quinoline (7h)

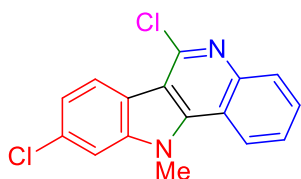

Prepared according to standard reaction conditions. Purification by column chromatography (SiO<sub>2</sub>, CH<sub>2</sub>Cl<sub>2</sub>/hexane, 2:3 v/v) to afford **7h** (80.4 mg, 52%) as a pale yellow solid; mp = 206.8–207.4 °C (CH<sub>2</sub>Cl<sub>2</sub>/hexane).

<sup>1</sup>H NMR (400 MHz, CDCl<sub>3</sub>): δ 8.41 (d, *J* = 8.4 Hz, 1H), 8.34 (dd, *J* = 8.4, 0.8 Hz, 1H), 8.08 (d, *J* = 8.4 Hz, 1H), 7.74 (ddd, *J* = 8.3, 6.9, 1.3 Hz, 1H), 7.53 (td, *J* = 7.6, 1.2 Hz, 1H), 7.32 (d, *J* = 1.6 Hz, 1H), 7.26 (dd, *J* = 8.2, 1.8 Hz, 1H), 3.89 (s, 3H); <sup>13</sup>C NMR (100 MHz, CDCl<sub>3</sub>): δ 152.4, 146.8, 143.3, 135.6, 134.5, 129.6, 127.8, 124.8, 124.0, 123.9, 122.3, 120.6, 118.2, 114.8, 108.9, 27.9 ppm; IR (ATR): 3067, 2919, 1632, 1598, 1470, 1392, 745 cm<sup>-1</sup>; HRMS (ESI–TOF) *m/z*: [M+H]<sup>+</sup> calcd for C<sub>16</sub>H<sub>11</sub>Cl<sub>2</sub>N<sub>2</sub> 301.0294; found 301.0297.

### 6-Chloro-2,11-dimethyl-11H-indolo[3,2-c]quinoline (7i)

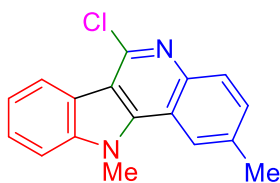

Prepared according to standard reaction conditions. Purification by column chromatography (SiO<sub>2</sub>, CH<sub>2</sub>Cl<sub>2</sub>/hexane, 2:3 v/v) to afford **7i** (114.2 mg, 75%) as a pale yellow solid; mp = 178.7–179.4 °C (CH<sub>2</sub>Cl<sub>2</sub>/hexane).

<sup>1</sup>H NMR (400 MHz, CDCl<sub>3</sub>): δ 8.59 (d, *J* = 7.6 Hz, 1H), 8.14 (s, 1H), 8.00 (d, *J* = 8.4 Hz, 1H), 7.61–7.55 (m, 2H), 7.38 (d, *J* = 8.0 Hz, 1H), 7.32 (t, *J* = 7.4 Hz, 1H), 3.94 (s, 3H), 2.60 (s, 3H); <sup>13</sup>C NMR (100 MHz, CDCl<sub>3</sub>): δ 152.0, 145.4, 142.7, 134.9, 133.4, 131.7, 128.4, 127.4, 124.1, 122.8, 122.1, 120.1, 119.8, 115.4, 108.4, 27.8, 21.7 ppm; IR (ATR): 3048, 2917, 1633, 1602, 1473, 1395, 733 cm<sup>-1</sup>; HRMS (ESI-TOF) *m/z*: [M+H]<sup>+</sup> calcd for C<sub>17</sub>H<sub>14</sub>ClN<sub>2</sub> 281.0840; found 281.0845.

### 6-Chloro-11-methyl-2-(trifluoromethyl)-11H-indolo[3,2-c]quinoline (7j)

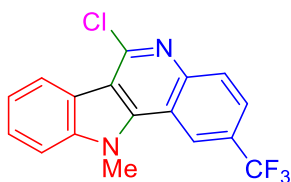

Prepared according to standard reaction conditions. Purification by column chromatography (SiO<sub>2</sub>, CH<sub>2</sub>Cl<sub>2</sub>/hexane, 2:3 v/v) to afford **7j** (165.9 mg, 83%) as a pale yellow solid; mp = 192.4–193.5 °C (CH<sub>2</sub>Cl<sub>2</sub>/hexane).

<sup>1</sup>H NMR (400 MHz, CDCl<sub>3</sub>): δ 8.61 (t, *J* = 0.8 Hz, 1H), 8.50 (dt, *J* = 8.0, 1.0 Hz, 1H), 8.11 (dt, *J* = 8.8, 0.7 Hz, 1H), 7.85 (dd, *J* = 9.0, 2.2 Hz, 1H), 7.59 (ddd, *J* = 8.2, 7.3, 1.1 Hz, 1H), 7.35–7.31 (m, 2H), 3.90 (s, 3H); <sup>13</sup>C NMR (100 MHz, CDCl<sub>3</sub>): δ 153.0, 147.7, 142.6, 135.8, 129.1, 128.7, 125.2 (q, *J*<sub>C,F</sub> = 32.3 Hz, C), 124.8 (q, *J*<sub>C,F</sub> = 2.5 Hz, CH), 124.4 (q, *J*<sub>C,F</sub> = 270.1 Hz, CF<sub>3</sub>), 124.2, 122.1 (q, *J*<sub>C,F</sub> = 4.4 Hz, CH), 121.0, 120.8, 119.1, 116.2, 108.7, 27.7 ppm; IR (ATR): 3064, 2933, 1626, 1605, 1472, 1398, 1248 (-CF<sub>3</sub>), 1156 (-CF), 742 cm<sup>-1</sup>; HRMS (ESI-TOF) *m/z*: [M+H]<sup>+</sup> calcd for C<sub>17</sub>H<sub>11</sub>ClF<sub>3</sub>N<sub>2</sub> 335.0557; found 335.0562.

### 6-Chloro-11-methyl-2-nitro-11H-indolo[3,2-c]quinoline (7k)

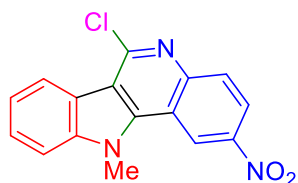

Prepared according to standard reaction conditions. Purification by column chromatography (SiO<sub>2</sub>, CH<sub>2</sub>Cl<sub>2</sub>/hexane, 3:2 v/v) to afford **7k** (80.2 mg, 51%) as a yellow solid; mp = 257.6–258.8 °C (CH<sub>2</sub>Cl<sub>2</sub>/hexane).

<sup>1</sup>H NMR (400 MHz, CDCl<sub>3</sub>): δ 9.31 (s, 1H), 8.58 (d, *J* = 7.6 Hz, 1H), 8.45 (dd, *J* = 9.2, 2.0 Hz, 1H), 8.12 (d, *J* = 9.2 Hz, 1H), 7.68 (t, *J* = 7.6 Hz, 1H), 7.46–7.40 (m, 2H), 3.99 (s, 3H); <sup>13</sup>C NMR (100 MHz, CDCl<sub>3</sub>): δ 154.0, 149.2, 143.2, 142.9, 136.8, 129.7, 129.0, 124.6, 122.8, 121.7, 121.5, 120.9, 119.2, 117.2, 109.1, 28.0 ppm; IR (ATR): 3084, 2919, 1633, 1603, 1519 (-NO), 1470, 1397, 1326 (-NO), 736 cm<sup>-1</sup>; HRMS (ESI-TOF) *m/z*: [M+H]<sup>+</sup> calcd for C<sub>16</sub>H<sub>11</sub>ClN<sub>3</sub>O<sub>2</sub> 312.0534; found 312.0538.

### 6-Chloro-2-fluoro-11-methyl-11H-indolo[3,2-c]quinoline (7l)

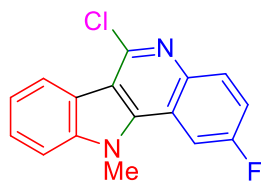

Prepared according to standard reaction conditions. Purification by column chromatography (SiO<sub>2</sub>, CH<sub>2</sub>Cl<sub>2</sub>/hexane, 2:3 v/v) to afford **7l** (98.9 mg, 68%) as a pale yellow solid; mp = 151.1–152.8 °C (CH<sub>2</sub>Cl<sub>2</sub>/hexane).

<sup>1</sup>H NMR (400 MHz, CDCl<sub>3</sub>): δ 8.56 (d, *J* = 8.0 Hz, 1H), 8.07 (dd, *J* = 9.2, 5.2 Hz, 1H), 7.98 (dd, *J* = 10.0, 2.8 Hz, 1H), 7.61 (t, *J* = 7.8 Hz, 1H), 7.49 (td, *J* = 8.6, 2.4 Hz, 1H), 7.39–7.32 (m, 2H), 3.93 (s, 3H); <sup>13</sup>C NMR (100 MHz, CDCl<sub>3</sub>): δ 158.7 (d, *J*<sub>C,F</sub> = 243.7 Hz, CF), 151.6, 143.4, 142.6, 134.1, 129.7 (d, *J*<sub>C,F</sub> = 9.4 Hz, CH), 128.7, 124.0, 122.3 (d, *J*<sub>C,F</sub> = 9.6 Hz, C), 120.2, 119.2, 119.1 (d, *J*<sub>C,F</sub> = 25.7 Hz, CH), 115.6, 108.3, 107.3 (d, *J*<sub>C,F</sub> = 25.9 Hz, CH), 27.5 ppm; IR (ATR): 3051, 2920, 1633, 1602, 1473, 1396, 1107 (-CF), 739 cm<sup>-1</sup>; HRMS (ESI-TOF) *m/z*: [M+H]<sup>+</sup> calcd for C<sub>16</sub>H<sub>11</sub>ClFN<sub>2</sub> 285.0589; found 285.0590.

### 2,6-Dichloro-11-methyl-11H-indolo[3,2-c]quinoline (7m)

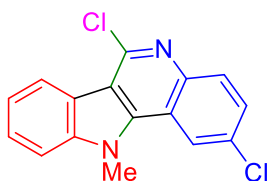

Prepared according to standard reaction conditions. Purification by column chromatography (SiO<sub>2</sub>, CH<sub>2</sub>Cl<sub>2</sub>/hexane, 2:3 v/v) to afford **7m** (139.2 mg, 89%) as a pale yellow solid; mp = 171.4–172.5 °C (CH<sub>2</sub>Cl<sub>2</sub>/hexane).

<sup>1</sup>H NMR (400 MHz, CDCl<sub>3</sub>): δ 8.54 (d, *J* = 7.6 Hz, 1H), 8.31 (d, *J* = 2.4 Hz, 1H), 8.00 (d, *J* = 8.8 Hz, 1H), 7.65–7.59 (m, 2H), 7.39–7.32 (m, 2H), 3.92 (s, 3H); <sup>13</sup>C NMR (100 MHz, CDCl<sub>3</sub>): δ 152.3, 145.1, 142.8, 134.3, 130.1, 129.3, 129.2, 128.9, 124.3, 122.9, 122.8, 120.5, 119.4, 116.0, 108.6, 27.8 ppm; IR (ATR): 3058, 2917, 1632, 1603, 1471, 1395, 735 cm<sup>-1</sup>; HRMS (ESI-TOF) *m/z*: [M+H]<sup>+</sup> calcd for C<sub>16</sub>H<sub>11</sub>Cl<sub>2</sub>N<sub>2</sub> 301.0294; found 301.0297.

### 2-Bromo-6-chloro-11-methyl-11H-indolo[3,2-c]quinoline (7n)

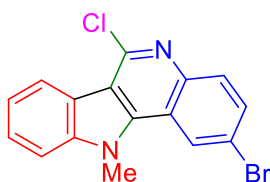

Prepared according to standard reaction conditions. Purification by column chromatography (SiO<sub>2</sub>, CH<sub>2</sub>Cl<sub>2</sub>/hexane, 3:2 v/v) to afford **7n** (101.8 mg, 57%) as a pale yellow solid; mp = 193.7–194.8 °C (CH<sub>2</sub>Cl<sub>2</sub>/hexane).

<sup>1</sup>H NMR (400 MHz, CDCl<sub>3</sub>): δ 8.48 (d, *J* = 7.6 Hz, 1H), 8.41 (d, *J* = 1.6 Hz, 1H), 7.88 (d, *J* = 8.8 Hz, 1H), 7.72 (dd, *J* = 8.8, 1.6 Hz, 1H), 7.58 (t, *J* = 7.6 Hz, 1H), 7.33–7.29 (m, 2H), 3.87 (s, 3H); <sup>13</sup>C NMR (100 MHz, CDCl<sub>3</sub>): δ 152.2, 145.2, 142.7, 134.0, 132.5, 129.3, 128.9, 126.1, 124.2, 123.2, 120.5, 119.3, 117.1, 115.8, 108.6, 27.7 ppm; IR (ATR): 3056, 2919, 1632, 1602, 1470, 1394, 733, 625 cm<sup>-1</sup>; HRMS (ESI-TOF) *m/z*: [M+H]<sup>+</sup> calcd for C<sub>16</sub>H<sub>11</sub>BrClN<sub>2</sub> 346.9768; found 346.9765.

### 3,6-Dichloro-11-methyl-11H-indolo[3,2-c]quinoline (7o)

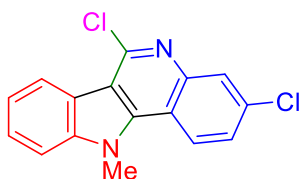

Prepared according to standard reaction conditions. Purification by column chromatography (SiO<sub>2</sub>, CH<sub>2</sub>Cl<sub>2</sub>/hexane, 2:3 v/v) to afford **7o** (102.2 mg, 66%) as a pale yellow solid; mp = 188.4–189.6 °C (CH<sub>2</sub>Cl<sub>2</sub>/hexane).

<sup>1</sup>H NMR (400 MHz, CDCl<sub>3</sub>): δ 8.46 (d, *J* = 7.6 Hz, 1H), 8.19 (d, *J* = 9.2 Hz, 1H), 7.99 (d, *J* = 2.0 Hz, 1H), 7.53 (t, *J* = 7.4 Hz, 1H), 7.36 (dd, *J* = 9.0, 1.8 Hz, 1H), 7.32–7.19 (m, 2H), 3.84 (s, 3H); <sup>13</sup>C NMR (100 MHz, CDCl<sub>3</sub>): δ 151.8, 146.1, 141.6, 134.3, 131.0, 127.7, 125.6, 124.3, 123.4, 123.1, 121.7, 119.6, 118.5, 114.6, 107.6, 26.8 ppm; IR (ATR): 3054, 2918, 1631, 1600, 1473, 1392, 738 cm<sup>-1</sup>; HRMS (ESI–TOF) *m/z*: [M+H]<sup>+</sup> calcd for C<sub>16</sub>H<sub>11</sub>Cl<sub>2</sub>N<sub>2</sub> 301.0294; found 301.0295.

### 6-Chloro-11-ethyl-11H-indolo[3,2-c]quinoline (7p)

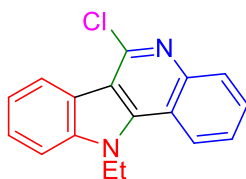

Prepared according to standard reaction conditions. Purification by column chromatography (SiO<sub>2</sub>, acetone/hexane, 2:3 v/v) to afford **7p** (123.5 mg, 85%) as a yellow solid; mp = 131.5–132.7 °C.

<sup>1</sup>H NMR (400 MHz, CDCl<sub>3</sub>): δ 8.61 (d, *J* = 7.6 Hz, 1H), 8.39 (dd, *J* = 8.4, 0.8 Hz, 1H), 8.11 (d, *J* = 8.4 Hz, 1H), 7.73 (ddd, *J* = 8.4, 7.0, 1.4 Hz, 1H), 7.59 (td, *J* = 7.8, 1.1 Hz, 1H), 7.52 (ddd, *J* = 8.4, 7.1, 1.1 Hz, 1H), 7.41 (d, *J* = 8.0 Hz, 1H), 7.32 (td, *J* = 7.6, 0.8 Hz, 1H), 4.55 (q, *J* = 7.2 Hz, 2H), 1.48 (t, *J* = 7.2 Hz, 3H); <sup>13</sup>C NMR (100 MHz, CDCl<sub>3</sub>): δ 151.7, 146.9, 141.8, 135.5, 129.3, 128.4, 127.8, 124.3, 124.0, 123.5, 122.2, 120.1, 119.9, 115.6, 108.7, 36.2, 13.6 ppm; IR (ATR): 3051, 2925, 1632, 1602, 1468, 1396, 735 cm<sup>-1</sup>; HRMS (ESI–TOF) *m/z*: [M+H]<sup>+</sup> calcd for C<sub>17</sub>H<sub>14</sub>ClN<sub>2</sub> 281.0840; found 281.0842.

### 11-Benzyl-6-chloro-11H-indolo[3,2-c]quinoline (7q)

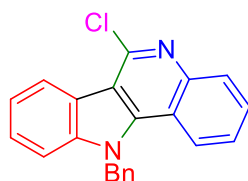

Prepared according to standard reaction conditions. Purification by column chromatography (SiO<sub>2</sub>, CH<sub>2</sub>Cl<sub>2</sub>/hexane, 2:3 v/v) to afford **7q** (162.6 mg, 93%) as a pale yellow solid; mp = 172.9–173.8 °C (CH<sub>2</sub>Cl<sub>2</sub>/hexane).

<sup>1</sup>H NMR (400 MHz, CDCl<sub>3</sub>): δ 8.63 (d, *J* = 8.0 Hz, 1H), 8.44 (dd, *J* = 8.4, 0.8 Hz, 1H), 8.12 (d, *J* = 8.4 Hz, 1H), 7.75 (td, *J* = 7.6, 1.2 Hz, 1H), 7.58–7.49 (m, 2H), 7.34–7.22 (m, 7H), 5.74 (s, 2H); <sup>13</sup>C NMR (100 MHz, CDCl<sub>3</sub>): δ 152.3, 147.0, 142.0, 137.0, 135.7, 129.4, 128.7 (2C), 128.5, 128.0, 127.5, 127.2 (2C), 124.2, 124.0, 123.8, 122.5, 120.5, 120.1, 115.5, 109.5, 45.1 ppm; IR (ATR): 3065, 2920, 1628, 1602, 1467, 744 cm<sup>-1</sup>; HRMS (ESI-TOF) *m/z*: [M+H]<sup>+</sup> calcd for C<sub>22</sub>H<sub>16</sub>ClN<sub>2</sub> 343.0997; found 343.0996.

### 6-Chloro-11H-indolo[3,2-c]quinoline (7r)<sup>4</sup>

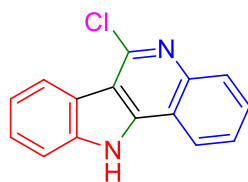

Prepared according to standard reaction conditions. Purification by column chromatography (SiO<sub>2</sub>, acetone/hexane, 2:3 v/v) to afford **7r** (51.2 mg, 38%) as an off white solid; mp = 280.0–281.3 °C (CH<sub>2</sub>Cl<sub>2</sub>/hexane).

<sup>1</sup>H NMR (400 MHz, DMSO-*d*<sub>6</sub>): δ 12.04 (s, 1H), 8.53 (d, *J* = 7.6 Hz, 1H), 8.38 (d, *J* = 8.0 Hz, 1H), 8.05 (d, *J* = 8.4 Hz, 1H), 7.83 (td, *J* = 7.6, 1.2 Hz, 1H), 7.65–7.60 (m, 2H), 7.55 (d, *J* = 8.0 Hz, 1H), 7.35 (t, *J* = 7.4 Hz, 1H); <sup>13</sup>C NMR (100 MHz, DMSO-*d*<sub>6</sub>): δ 152.6, 146.6, 141.7, 134.1, 129.7, 129.1, 127.5, 124.1, 123.7, 123.5, 121.4, 120.2, 119.2, 115.2, 111.2 ppm; IR (ATR): 3139 (-NH), 3071, 2927, 1613, 1572, 734 cm<sup>-1</sup>; HRMS (ESI-TOF) *m/z*: [M+H]<sup>+</sup> calcd for C<sub>15</sub>H<sub>10</sub>ClN<sub>2</sub> 253.0527; found 253.0526.

### 6-Chloro-11-(4-chlorobutyl)-11H-indolo[3,2-c]quinoline (7s)

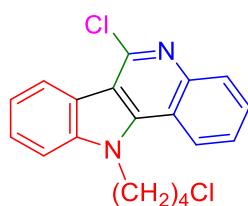

Prepared according to standard reaction conditions. Purification by column chromatography (SiO<sub>2</sub>, CH<sub>2</sub>Cl<sub>2</sub>/hexane, 3:2 v/v) to afford **7s** (146.8 mg, 82%) as a pale yellow solid; mp = 121.7–122.9 °C (CH<sub>2</sub>Cl<sub>2</sub>/hexane).

<sup>1</sup>H NMR (400 MHz, CDCl<sub>3</sub>): δ 8.55 (d, *J* = 7.6 Hz, 1H), 8.34 (dd, *J* = 8.8, 1.2 Hz, 1H), 8.06 (d, *J* = 7.2 Hz, 1H), 7.70 (ddd, *J* = 8.4, 6.8, 1.6 Hz, 1H), 7.54 (ddd, *J* = 8.3, 7.3, 1.1 Hz, 1H), 7.49 (ddd, *J* = 8.3, 6.9, 1.3 Hz, 1H), 7.34 (d, *J* = 8.0 Hz, 1H), 7.29 (td, *J* = 7.6, 0.7 Hz, 1H), 4.47 (t, *J* = 7.0 Hz, 2H), 3.60 (t, *J* = 6.4 Hz, 2H), 2.11–2.03 (m, 2H), 1.85–1.78 (m, 2H); <sup>13</sup>C NMR (100 MHz, CDCl<sub>3</sub>): δ 152.0, 146.8, 141.8, 135.5, 129.3, 128.4, 127.8, 124.2, 123.9, 123.6, 122.2, 120.2, 119.8, 115.3, 108.6, 44.5, 40.4, 29.7, 25.7 ppm; IR (ATR): 3054, 2924, 1628, 1601, 1466, 744 cm<sup>-1</sup>; HRMS (ESI-TOF) *m/z*: [M+H]<sup>+</sup> calcd for C<sub>19</sub>H<sub>17</sub>Cl<sub>2</sub>N<sub>2</sub> 343.0763; found 343.0764.

### 6-Chlorobenzo[4,5]thieno[3,2-c]quinoline (8a)

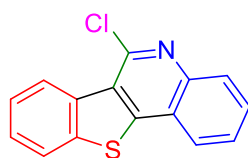

Prepared according to standard reaction conditions. Purification by column chromatography (SiO<sub>2</sub>, EtOAc/hexane, 1:4 v/v) to afford **8a** (107.8 mg, 79%) as an off white solid; mp = 196.2–197.9 °C (CH<sub>2</sub>Cl<sub>2</sub>/hexane).

<sup>1</sup>H NMR (400 MHz, CDCl<sub>3</sub>): δ 8.99–8.97 (m, 1H), 8.47 (dt, *J* = 8.8, 0.7 Hz, 1H), 8.13 (dt, *J* = 8.4, 0.4 Hz, 1H), 7.86–7.84 (m, 1H), 7.81 (ddd, *J* = 8.3, 6.9, 1.3 Hz, 1H), 7.66 (ddd, *J* = 8.3, 6.9, 1.3 Hz, 1H), 7.57 (td, *J* = 7.1, 1.6 Hz, 1H), 7.53 (td, *J* = 7.2, 1.6 Hz, 1H); <sup>13</sup>C NMR (100 MHz, CDCl<sub>3</sub>): δ 163.1, 147.3, 138.4, 137.3, 132.2, 130.3, 128.6, 128.2, 126.5, 126.4, 125.2, 125.0, 124.3, 124.1, 122.8 ppm; IR (ATR): 3056, 2921, 1614, 1574, 1482, 727 cm<sup>-1</sup>; HRMS (ESI-TOF) *m/z*: [M+H]<sup>+</sup> calcd for C<sub>15</sub>H<sub>9</sub>ClNS 270.0139; found 270.0142.

### 6-Chloro-2-methylbenzo[4,5]thieno[3,2-*c*]quinoline (**8b**)

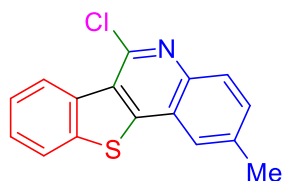

Prepared according to standard reaction conditions. Purification by column chromatography (SiO<sub>2</sub>, EtOAc/hexane, 1:4 v/v) to afford **8b** (102.0 mg, 72%) as a white solid; mp = 167.6–168.4 °C (CH<sub>2</sub>Cl<sub>2</sub>/hexane).

<sup>1</sup>H NMR (400 MHz, CDCl<sub>3</sub>): δ 8.91 (dd, *J* = 8.0, 0.8 Hz, 1H), 8.15 (s, 1H), 7.97 (d, *J* = 8.8 Hz, 1H), 7.81 (dd, *J* = 6.8, 1.2 Hz, 1H), 7.57 (dd, *J* = 8.4, 1.6 Hz, 1H), 7.54–7.46 (m, 2H), 2.58 (s, 3H); <sup>13</sup>C NMR (100 MHz, CDCl<sub>3</sub>): δ 162.1, 146.0, 138.5, 136.6, 136.5, 132.7, 132.3, 128.5, 128.0, 126.5, 125.1, 125.0, 124.0, 123.0, 122.8, 22.0 ppm; IR (ATR): 3057, 2911, 1623, 1574, 1490, 1462, 1373, 722 cm<sup>-1</sup>; HRMS (ESI-TOF) *m/z*: [M+H]<sup>+</sup> calcd for C<sub>16</sub>H<sub>11</sub>ClNS 284.0295; found 284.0300.

### 6-Chloro-2-(trifluoromethyl)benzo[4,5]thieno[3,2-*c*]quinoline (**8c**)

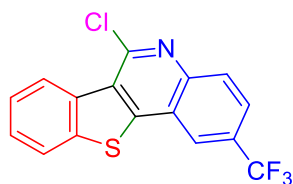

Prepared according to standard reaction conditions. Purification by column chromatography (SiO<sub>2</sub>, EtOAc/hexane, 1:4 v/v) to afford **8c** (99.3 mg, 58%) as a white solid; mp = 186.6–187.7 °C (CH<sub>2</sub>Cl<sub>2</sub>/hexane).

<sup>1</sup>H NMR (400 MHz, CDCl<sub>3</sub>): δ 8.96–8.94 (m, 1H), 8.76 (t, *J* = 0.8 Hz, 1H), 8.21 (d, *J* = 9.2 Hz, 1H), 7.95 (dd, *J* = 9.0, 1.8 Hz, 1H), 7.87–7.84 (m, 1H), 7.60 (td, *J* = 7.5, 1.3 Hz, 1H), 7.55 (td, *J* = 7.6, 1.5 Hz, 1H); <sup>13</sup>C NMR (100 MHz, CDCl<sub>3</sub>): δ 165.6, 148.0, 138.6, 137.9, 131.7, 129.6, 129.3, 128.3 (q, *J*<sub>C,F</sub> = 32.7 Hz, C), 126.8, 126.7 (q, *J*<sub>C,F</sub> = 271.7 Hz, CF<sub>3</sub>), 126.3, 126.0 (q, *J*<sub>C,F</sub> = 3.2 Hz, CH), 125.5, 123.3, 123.0, 122.7 (q, *J*<sub>C,F</sub> = 4.8 Hz, CH) ppm; IR (ATR): 3062, 1629, 1574, 1499, 1243 (-CF<sub>3</sub>), 1115 (-CF), 728 cm<sup>-1</sup>; HRMS (ESI-TOF) *m/z*: [M+H]<sup>+</sup> calcd for C<sub>16</sub>H<sub>8</sub>ClF<sub>3</sub>NS 338.0013; found 338.0012.



### 6-Chloro-2-nitrobenzo[4,5]thieno[3,2-*c*]quinoline (**8d**)

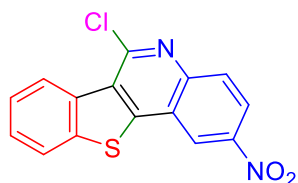

Prepared according to standard reaction conditions. Purification by column chromatography (SiO<sub>2</sub>, EtOAc/hexane, 1:4 v/v) to afford **8d** (58.8 mg, 38%) as a pale yellow solid; mp = 295.1–296.4 °C (CH<sub>2</sub>Cl<sub>2</sub>/hexane).

<sup>1</sup>H NMR (400 MHz, CDCl<sub>3</sub>): δ 9.46 (d, *J* = 2.4 Hz, 1H), 9.03–9.01 (m, 1H), 8.57 (dd, *J* = 9.2, 2.8 Hz, 1H), 8.25 (d, *J* = 9.2 Hz, 1H), 7.92–7.90 (m, 1H), 7.67 (td, *J* = 7.5, 1.5 Hz, 1H), 7.62 (td, *J* = 7.6, 1.5 Hz, 1H); <sup>13</sup>C NMR (100 MHz, CDCl<sub>3</sub>): δ 167.3, 148.8, 145.3, 138.6, 138.5, 131.3, 130.2, 129.7, 127.0, 126.9, 125.8, 123.7, 123.3, 123.1, 121.9 ppm; IR (ATR): 3065, 2839, 1619, 1578, 1516 (-NO), 1475, 1335 (-NO), 738 cm<sup>-1</sup>; HRMS (ESI-TOF) *m/z*: [M+H]<sup>+</sup> calcd for C<sub>15</sub>H<sub>8</sub>ClN<sub>2</sub>O<sub>2</sub>S 314.9990; found 314.9993.

### 6-Chloro-2-fluorobenzo[4,5]thieno[3,2-*c*]quinoline (**8e**)

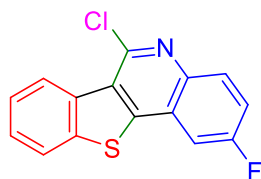

Prepared according to standard reaction conditions. Purification by column chromatography (SiO<sub>2</sub>, EtOAc/hexane, 1:4 v/v) to afford **8e** (95.7 mg, 65%) as a white solid; mp = 200.3–201.8 °C (CH<sub>2</sub>Cl<sub>2</sub>/hexane).

<sup>1</sup>H NMR (400 MHz, CDCl<sub>3</sub>): δ 8.92 (dt, *J* = 8.4, 0.8 Hz, 1H), 8.10 (dd, *J* = 9.4, 5.4 Hz, 1H), 8.04 (dd, *J* = 10.2, 3.0 Hz, 1H), 7.83 (ddd, *J* = 7.9, 1.3, 0.5 Hz, 1H), 7.59–7.50 (m, 3H); <sup>13</sup>C NMR (100 MHz, CDCl<sub>3</sub>): δ 162.4, 160.6 (d, *J*<sub>C,F</sub> = 247.1 Hz, CF), 144.3, 138.8, 136.2, 131.8, 130.8 (d, *J*<sub>C,F</sub> = 9.2 Hz, CH), 129.0, 126.7, 125.7, 125.2, 125.0 (d, *J*<sub>C,F</sub> = 10.0 Hz, C), 122.9, 120.7 (d, *J*<sub>C,F</sub> = 26.1 Hz, CH), 108.0 (d, *J*<sub>C,F</sub> = 24.9 Hz, CH) ppm; IR (ATR): 3052, 2914, 1625, 1574, 1489, 1185 (-CF), 725 cm<sup>-1</sup>; HRMS (ESI-TOF) *m/z*: [M+H]<sup>+</sup> calcd for C<sub>15</sub>H<sub>8</sub>ClFNS 288.0045; found 288.0047.

### 2,6-Dichlorobenzo[4,5]thieno[3,2-*c*]quinoline (**8f**)

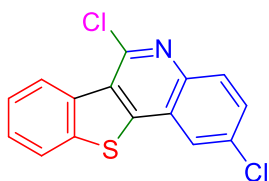

Prepared according to standard reaction conditions. Purification by column chromatography (SiO<sub>2</sub>, EtOAc/hexane, 1:4 v/v) to afford **8f** (92.0 mg, 60%) as a white solid; mp = 245.9–246.7 °C (CH<sub>2</sub>Cl<sub>2</sub>/hexane).

<sup>1</sup>H NMR (400 MHz, CDCl<sub>3</sub>): δ 8.94 (d, *J* = 8.0 Hz, 1H), 8.42 (d, *J* = 2.4 Hz, 1H), 8.04 (d, *J* = 8.8 Hz, 1H), 7.85 (dd, *J* = 7.2, 1.2 Hz, 1H), 7.71 (dd, *J* = 9.2, 2.4 Hz, 1H), 7.58 (td, *J* = 7.5, 1.3 Hz, 1H), 7.53 (td, *J* = 7.6, 1.2 Hz, 1H); <sup>13</sup>C NMR (100 MHz, CDCl<sub>3</sub>): δ 163.5, 145.7, 138.7, 132.6, 131.9, 131.3, 129.9, 129.1, 126.8, 125.9, 125.3, 124.9, 123.3 (2C), 123.0 ppm; IR (ATR): 3042, 2965, 1604, 1570, 1472, 725 cm<sup>-1</sup>; HRMS (ESI-TOF) *m/z*: [M+H]<sup>+</sup> calcd for C<sub>15</sub>H<sub>8</sub>Cl<sub>2</sub>NS 303.9749; found 303.9752.

### 2-Bromo-6-chlorobenzo[4,5]thieno[3,2-*c*]quinoline (**8g**)

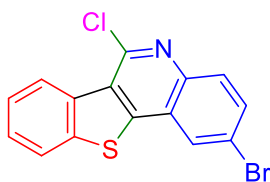

Prepared according to standard reaction conditions. Purification by column chromatography (SiO<sub>2</sub>, EtOAc/hexane, 1:4 v/v) to afford **8g** (118.3 mg, 67%) as a pale brown solid; mp = 241.6–242.8 °C (CH<sub>2</sub>Cl<sub>2</sub>/hexane).

<sup>1</sup>H NMR (400 MHz, CDCl<sub>3</sub>): δ 8.97 (dt, *J* = 8.2, 0.9 Hz, 1H), 8.62 (d, *J* = 2.0 Hz, 1H), 7.99 (d, *J* = 8.8 Hz, 1H), 7.88–7.84 (m, 2H), 7.60 (td, *J* = 7.5, 1.3 Hz, 1H), 7.55 (td, *J* = 7.7, 1.3 Hz, 1H); <sup>13</sup>C NMR (100 MHz, CDCl<sub>3</sub>): δ 163.5, 145.8, 138.7, 136.0, 133.8, 131.9, 129.9, 129.1, 129.0, 126.8, 126.6, 125.9, 125.3, 123.0, 120.7 ppm; IR (ATR): 3037, 2919, 1600, 1571, 1471, 725, 644 cm<sup>-1</sup>; HRMS (ESI-TOF) *m/z*: [M+H]<sup>+</sup> calcd for C<sub>15</sub>H<sub>8</sub>BrClNS 347.9244; found 347.9253.

### 3,6-Dichlorobenzo[4,5]thieno[3,2-*c*]quinoline (**8h**)

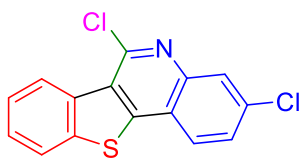

Prepared according to standard reaction conditions. Purification by column chromatography (SiO<sub>2</sub>, EtOAc/hexane, 1:4 v/v) to afford **8h** (109.9 mg, 72%) as an off white solid; mp = 219.9–221.3 °C (CH<sub>2</sub>Cl<sub>2</sub>/hexane).

<sup>1</sup>H NMR (400 MHz, CDCl<sub>3</sub>): δ 8.92 (dd, *J* = 8.0, 1.2 Hz, 1H), 8.37 (d, *J* = 9.2 Hz, 1H), 8.09 (d, *J* = 2.0 Hz, 1H), 7.84 (dd, *J* = 7.6, 1.2 Hz, 1H), 7.59–7.51 (m, 3H); <sup>13</sup>C NMR (100 MHz, CDCl<sub>3</sub>): δ 164.4, 147.4, 138.4, 137.2, 136.5, 131.9, 128.9, 127.4, 127.1, 126.5, 125.7, 125.4, 125.2, 122.9, 122.6 ppm; IR (ATR): 3078, 1601, 1573, 1476, 726 cm<sup>-1</sup>; HRMS (ESI–TOF) *m/z*: [M+H]<sup>+</sup> calcd for C<sub>15</sub>H<sub>8</sub>Cl<sub>2</sub>NS 303.9749; found 303.9756.

### 2-(2-Isocyanophenyl)-1-methyl-1*H*-indole (**9a**)<sup>5-6</sup>

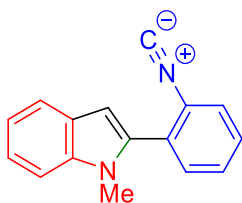

Compound **9a** was prepared according to the standard reaction conditions except for the reaction was carried out at 0 °C for 1 h. Purification by column chromatography (SiO<sub>2</sub>, CH<sub>2</sub>Cl<sub>2</sub>/hexane, 2:3 v/v) to afford **9a** (37.5 mg, 32%) as brown oil.

<sup>1</sup>H NMR (500 MHz, CDCl<sub>3</sub>): δ 7.67 (d, *J* = 8.0 Hz, 1H), 7.54–7.44 (m, 4H), 7.39 (d, *J* = 8.0 Hz, 1H), 7.29 (ddd, *J* = 7.6, 7.6, 0.8 Hz, 1H), 7.17 (t, *J* = 7.5 Hz, 1H), 6.64 (s, 1H), 3.67 (s, 3H); <sup>13</sup>C NMR (126 MHz, CDCl<sub>3</sub>): δ 167.2, 138.2, 135.7, 132.1, 130.4, 129.3, 129.3, 127.7, 127.6, 126.3, 122.3, 120.9, 120.1, 109.8, 103.7, 31.1 ppm; HRMS (ESI–TOF) *m/z*: [M+H]<sup>+</sup> calcd for C<sub>16</sub>H<sub>13</sub>N<sub>2</sub> 233.1074; found 233.1075.

## 5. Preparation of 10aa, 10ab, 10ac, 10nb, 10pb, and 11aa (Suzuki–Miyaura cross-coupling)<sup>7</sup>

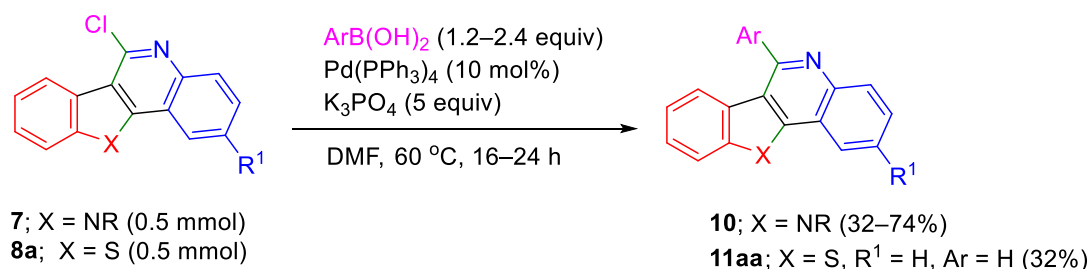

To a two-necked flask containing **7** or **8** (0.5 mmol, 1.0 equiv), arylboronic acid (0.6–1.2 mmol, 1.2–2.4 equiv), K<sub>3</sub>PO<sub>4</sub> (2.5 mmol, 5.0 equiv), and Pd(PPh<sub>3</sub>)<sub>4</sub> (0.05 mmol, 0.1 equiv) was added DMF (5.0 mL) at room temperature. Next, the reaction mixture was stirred at 60 °C under an argon atmosphere for 16–24 h. The reaction mixture was cooled to room temperature and the resulting mixture was extracted with EtOAc (3 × 10 mL). The combined organic layers were washed with brine (20 mL), dried (anh. Na<sub>2</sub>SO<sub>4</sub>), filtered and concentrated under reduced pressure (aspirator). The crude product was purified by column chromatography on silica gel using CH<sub>2</sub>Cl<sub>2</sub>/hexane or EtOAc/hexane as the eluent to obtain the corresponding product **10** or **11**.

## 6. Preparation of 12aa, 12ab, 12ac and 12na (Heck cross-coupling)<sup>8</sup>

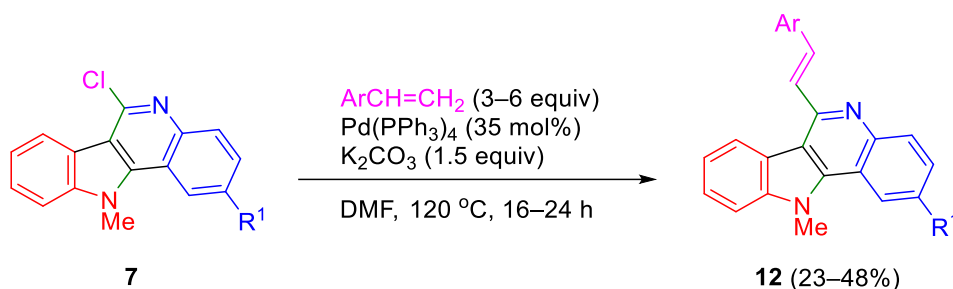

To a two-necked flask containing **7** (0.5 mmol, 1.0 equiv), K<sub>2</sub>CO<sub>3</sub> (0.75 mmol, 1.5 equiv), and Pd(PPh<sub>3</sub>)<sub>4</sub> (0.175 mmol, 0.35 equiv) was added DMF (3.0 mL) at room temperature under argon atmosphere. Next, a solution of styrene derivatives (1.5–3.0 mmol, 3.0–6.0 equiv) in DMF (2.0 mL) was added through the septum by using a syringe. The reaction mixture was heated at 120 °C under argon atmosphere for 16–24 h. After that, the reaction mixture was cooled to room temperature and the resulting mixture was extracted with EtOAc (3 × 10 mL). The combined organic layers were washed with brine (20 mL), dried (anh. Na<sub>2</sub>SO<sub>4</sub>), filtered and concentrated under reduced pressure (aspirator). The crude product was purified by column chromatography on silica gel using EtOAc/hexane as the eluent to yield the corresponding product **12**.

## 7. Preparation of 11-methyl-6-(piperidin-1-yl)-11H-indolo[3,2-c]quinoline (**13a**)<sup>9</sup>

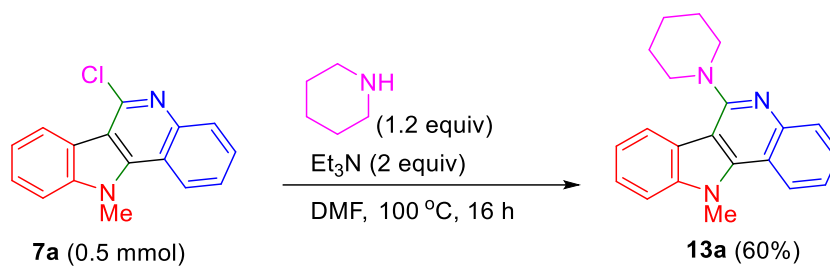

To a two-necked flask containing of **7a** (0.5 mmol, 1.0 equiv), piperidine (0.6 mmol, 1.2 equiv), and Et<sub>3</sub>N (1.0 mmol, 2.0 equiv) was added DMF (5.0 mL) at room temperature. Next, the reaction mixture was stirred at 100 °C for overnight (16 h). The reaction mixture was cooled to room temperature and the resulting mixture was extracted with EtOAc (3 × 10 mL). The combined organic layers were washed with brine (20 mL), dried (anh. Na<sub>2</sub>SO<sub>4</sub>), filtered and concentrated under reduced pressure (aspirator). The crude product was purified by column chromatography on silica gel using CH<sub>2</sub>Cl<sub>2</sub>/hexane as the eluent to give the corresponding product **13a**.

## 8. Characterization data of compounds 10, 11 and 13

### 11-Methyl-6-phenyl-11H-indolo[3,2-c]quinoline (10aa)

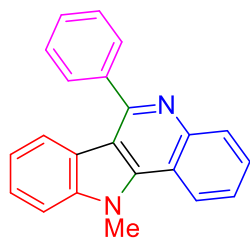

Prepared according to standard reaction conditions. Purification by column chromatography (SiO<sub>2</sub>, CH<sub>2</sub>Cl<sub>2</sub>/hexane, 2:3 v/v) to afford **10aa** (99.2 mg, 64%) as a yellow solid; mp = 175.8–177.0 °C (CH<sub>2</sub>Cl<sub>2</sub>/hexane).

<sup>1</sup>H NMR (400 MHz, CDCl<sub>3</sub>): δ 8.18 (d, *J* = 8.4 Hz, 1H), 7.74–7.62 (m, 5H), 7.52–7.45 (m, 3H), 7.37–7.32 (m, 2H), 7.06 (d, *J* = 7.6 Hz, 1H), 6.98 (t, *J* = 7.4 Hz, 1H), 4.01 (s, 3H); <sup>13</sup>C NMR (100 MHz, CDCl<sub>3</sub>): δ 152.4, 146.8, 142.3, 136.6, 130.0, 129.4 (2C), 128.9 (2C), 128.7, 128.5, 127.7, 127.5, 126.4, 123.7, 123.0, 122.7, 120.5, 119.7, 115.4, 108.4, 27.7 ppm; IR (ATR): 3056, 2920, 1626, 1605, 1473, 1389 cm<sup>-1</sup>; HRMS (ESI-TOF) *m/z*: [M+H]<sup>+</sup> calcd for C<sub>22</sub>H<sub>17</sub>N<sub>2</sub> 309.1386; found 309.1384.

### 4-(11-Methyl-11H-indolo[3,2-c]quinoline-6-yl)benzonitrile (10ab)

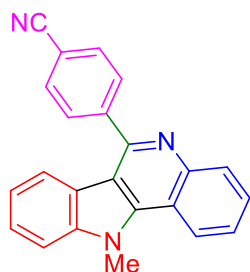

Prepared according to standard reaction conditions. Purification by column chromatography (SiO<sub>2</sub>, CH<sub>2</sub>Cl<sub>2</sub>/hexane, 3:2 v/v) to afford **10ab** (125.5 mg, 74%) as a yellow solid; mp = 154.4–155.7 °C (CH<sub>2</sub>Cl<sub>2</sub>/hexane).

<sup>1</sup>H NMR (400 MHz, CDCl<sub>3</sub>): δ 8.20 (d, *J* = 8.4 Hz, 1H), 7.97 (d, *J* = 8.4 Hz, 2H), 7.74 (td, *J* = 7.6, 1.3 Hz, 1H), 7.69 (d, *J* = 8.4 Hz, 2H), 7.59–7.52 (m, 2H), 7.44–7.37 (m, 2H), 7.04 (t, *J* = 7.2 Hz, 1H), 6.98 (d, *J* = 7.6 Hz, 1H), 4.05 (s, 3H); <sup>13</sup>C NMR (100 MHz, CDCl<sub>3</sub>): δ 152.2, 146.7, 143.1, 139.0, 138.2, 134.1, 133.0, 132.3, 130.0, 129.0, 128.3, 127.9, 125.5, 123.4, 123.0, 122.6, 120.0, 119.9, 118.4, 115.9, 113.5, 108.8, 27.8 ppm; IR (ATR): 3028, 2927, 2228 (-CN), 1626, 1596, 1472, 1394 cm<sup>-1</sup>; HRMS (ESI-TOF) *m/z*: [M+H]<sup>+</sup> calcd for C<sub>23</sub>H<sub>16</sub>N<sub>3</sub> 334.1339; found 334.1340.

### 11-Methyl-6-(naphthalen-1-yl)-11H-indolo[3,2-c]quinoline (10ac)

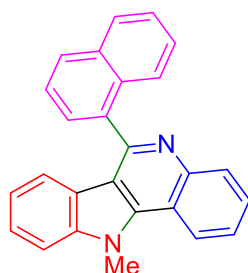

Prepared according to standard reaction conditions. Purification by column chromatography (SiO<sub>2</sub>, CH<sub>2</sub>Cl<sub>2</sub>/hexane, 3:2 v/v) to afford **10ac** (112.9 mg, 63%) as an off white solid; mp = 212.3–213.4 °C (CH<sub>2</sub>Cl<sub>2</sub>/hexane).

<sup>1</sup>H NMR (400 MHz, CDCl<sub>3</sub>): δ 8.24 (dd, *J* = 8.4, 0.4 Hz, 1H), 8.13 (d, *J* = 8.4 Hz, 1H), 8.03 (d, *J* = 8.4 Hz, 1H), 7.74–7.69 (m, 2H), 7.59 (dd, *J* = 6.8, 1.2 Hz, 1H), 7.52–7.48 (m, 2H), 7.42 (td, *J* = 7.6, 1.1 Hz, 1H), 7.37 (d, *J* = 7.6 Hz, 1H), 7.28–7.19 (m, 3H), 6.81 (td, *J* = 7.4, 1.2 Hz, 1H), 6.54 (d, *J* = 7.6 Hz, 1H), 4.07 (s, 3H); <sup>13</sup>C NMR (100 MHz, CDCl<sub>3</sub>): δ 152.5, 146.8, 142.9, 140.6, 134.2, 133.7, 131.7, 128.9, 128.8, 128.4, 127.7, 127.6, 127.3, 126.7, 126.6, 126.4, 125.8 (2C), 124.4, 123.1, 122.9, 120.4, 119.8, 117.0, 108.3, 27.8 ppm; IR (ATR): 3048, 2920, 1626, 1601, 1471, 1392 cm<sup>-1</sup>; HRMS (ESI-TOF) *m/z*: [M+H]<sup>+</sup> calcd for C<sub>26</sub>H<sub>19</sub>N<sub>2</sub> 359.1543; found 359.1540.

### 4,4'-(11-Methyl-11H-indolo[3,2-c]quinoline-2,6-diyl)dibenzonitrile (10nb)

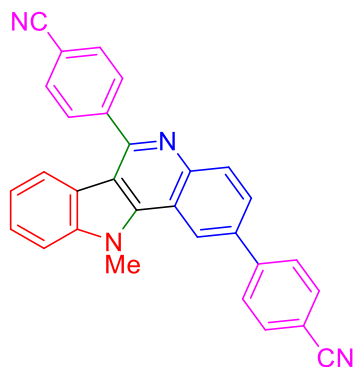

Prepared according to standard reaction conditions. Purification by column chromatography (SiO<sub>2</sub>, EtOAc/hexane, 1:4 v/v) to afford **10nb** (69.9 mg, 32%) as a yellow solid; mp = 321.2–322.7 °C (CH<sub>2</sub>Cl<sub>2</sub>/hexane).

<sup>1</sup>H NMR (400 MHz, CDCl<sub>3</sub>): δ 8.28 (dd, *J* = 8.8, 0.4 Hz, 1H), 8.02–7.99 (m, 2H), 7.96 (dd, *J* = 8.8, 2.4 Hz, 1H), 7.74–7.70 (m, 5H), 7.67–7.64 (m, 2H), 7.56 (ddd, *J* = 8.4, 7.2, 1.2 Hz, 1H), 7.44 (d, *J* = 8.0 Hz, 1H), 7.07 (td, *J* = 7.6, 0.8 Hz, 1H), 6.97 (ddd, *J* = 7.7, 1.1, 0.7 Hz, 1H), 4.04 (s, 3H); <sup>13</sup>C NMR (100 MHz, CDCl<sub>3</sub>): δ NMR (101 MHz, ) δ 152.5, 146.6, 145.2,



143.2, 141.3, 139.8, 133.9, 133.1 (2C), 132.7 (2C), 130.5 (2C), 128.8, 128.7, 128.0, 127.8 (2C), 123.9, 122.8, 122.7, 120.3, 119.7, 118.9, 118.5, 116.3, 113.1, 110.8, 109.0, 27.8 ppm; IR (ATR): 3055, 2920, 2228 (-CN), 1724, 1595, 1474, 1395  $\text{cm}^{-1}$ ; HRMS (ESI-TOF)  $m/z$ :  $[\text{M}+\text{H}]^+$  calcd for  $\text{C}_{30}\text{H}_{19}\text{N}_4$  435.1604; found 435.1605.

#### 4-(11-Ethyl-11H-indolo[3,2-c]quinoline-6-yl)benzonitrile (10pb)

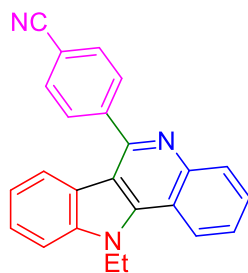

Prepared according to standard reaction conditions. Purification by column chromatography ( $\text{SiO}_2$ ,  $\text{CH}_2\text{Cl}_2$ /hexane, 3:2 v/v) to afford **10pb** (106.0 mg, 61%) as a pale yellow solid; mp = 215.5–216.8  $^\circ\text{C}$  ( $\text{CH}_2\text{Cl}_2$ /hexane).

$^1\text{H}$  NMR (400 MHz,  $\text{CDCl}_3$ ):  $\delta$  8.19 (d,  $J = 8.4$  Hz, 1H), 7.94 (d,  $J = 8.0$  Hz, 2H), 7.72 (ddd,  $J = 8.4, 6.8, 1.4$  Hz, 1H), 7.65 (d,  $J = 8.4$  Hz, 2H), 7.56 (dd,  $J = 8.4, 0.8$  Hz, 1H), 7.51 (td,  $J = 7.5, 1.4$  Hz, 1H), 7.42 (d,  $J = 8.0$  Hz, 1H), 7.36 (ddd,  $J = 8.1, 6.9, 1.1$  Hz, 1H), 7.02 (td,  $J = 7.4, 0.8$  Hz, 1H), 6.97 (d,  $J = 7.2$  Hz, 1H), 4.62 (q,  $J = 7.2$  Hz, 2H), 1.52 (t,  $J = 7.2$  Hz, 3H);  $^{13}\text{C}$  NMR (100 MHz,  $\text{CDCl}_3$ ):  $\delta$  151.5, 146.7, 142.1, 141.8, 139.5, 132.8 (2C), 130.5 (2C), 128.9, 128.2, 128.0, 125.5, 123.2, 122.8 (2C), 120.0, 119.7, 118.6, 115.5, 112.6, 108.9, 36.1, 13.6 ppm; IR (ATR): 3061, 2923, 2224 (-CN), 1626, 1595, 1466, 1398  $\text{cm}^{-1}$ ; HRMS (ESI-TOF)  $m/z$ :  $[\text{M}+\text{H}]^+$  calcd for  $\text{C}_{24}\text{H}_{18}\text{N}_3$  348.1495; found 348.1498.

#### 6-Phenylbenzo[4,5]thieno[3,2-c]quinoline (11aa)

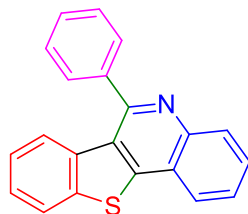

Prepared according to standard reaction conditions. Purification by column chromatography ( $\text{SiO}_2$ , EtOAc/hexane, 1:9 v/v) to afford **11aa** (50.2 mg, 32%) as an off white solid; mp = 218.1–219.4  $^\circ\text{C}$  ( $\text{CH}_2\text{Cl}_2$ /hexane).

$^1\text{H}$  NMR (400 MHz,  $\text{CDCl}_3$ ):  $\delta$  8.19 (d,  $J = 8.4$  Hz, 1H), 7.81–7.74 (m, 2H), 7.68–7.60 (m, 4H), 7.47–7.37 (m, 4H), 7.09 (t,  $J = 7.4$  Hz, 1H), 6.78 (d,  $J = 8.0$  Hz, 1H);  $^{13}\text{C}$  NMR (100

MHz, CDCl<sub>3</sub>):  $\delta$  163.2, 147.1, 143.7, 138.5, 136.3, 133.0, 130.2, 129.6, 129.4 (2C), 129.0 (2C), 128.8, 128.1, 127.8, 126.6, 125.9, 125.4, 125.3, 124.6, 122.9 ppm; IR (ATR): 3036, 2917, 1568, 1553, 1479, 1441 cm<sup>-1</sup>; HRMS (ESI-TOF)  $m/z$ : [M+H]<sup>+</sup> calcd for C<sub>21</sub>H<sub>14</sub>NS 312.0841; found 312.0842.

**(E)-11-Methyl-6-styryl-11H-indolo[3,2-c]quinoline (12aa)**

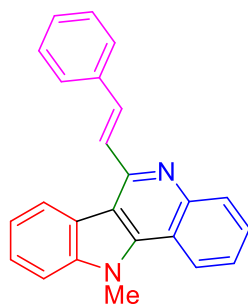

Prepared according to standard reaction conditions. Purification by column chromatography (SiO<sub>2</sub>, EtOAc/hexane, 1:19 v/v) to afford **12aa** (75.7 mg, 45%) as a yellow solid; mp = 162.9–164.2 °C (CH<sub>2</sub>Cl<sub>2</sub>/hexane).

<sup>1</sup>H NMR (400 MHz, CDCl<sub>3</sub>):  $\delta$  8.33 (d,  $J$  = 8.0 Hz, 1H), 8.24 (d,  $J$  = 7.6 Hz, 1H), 8.15 (d,  $J$  = 8.4 Hz, 1H), 7.90 (d,  $J$  = 16.8 Hz, 1H), 7.75–7.71 (m, 3H), 7.57–7.41 (m, 6H), 7.23–7.19 (m, 2H), 4.00 (s, 3H); <sup>13</sup>C NMR (100 MHz, CDCl<sub>3</sub>):  $\delta$  152.5, 146.8, 142.9, 139.1, 138.0, 136.6, 129.0 (2C), 128.8, 128.7, 127.9, 127.7, 126.9 (2C), 125.5, 123.7, 123.0, 122.8 (2C), 120.9, 119.8, 115.1, 108.5, 27.7 ppm; IR (ATR): 3057, 2922, 1635, 1589, 1470, 1389 cm<sup>-1</sup>; HRMS (ESI-TOF)  $m/z$ : [M+H]<sup>+</sup> calcd for C<sub>24</sub>H<sub>19</sub>N<sub>2</sub> 335.1543; found 335.1542.

**(E)-6-(4-Methoxystyryl)-11-methyl-11H-indolo[3,2-c]quinoline (12ab)**

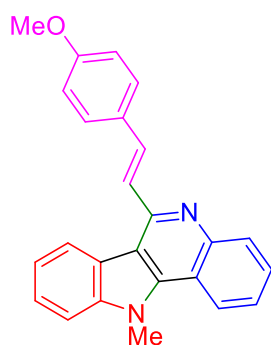

Prepared according to standard reaction conditions. Purification by column chromatography (SiO<sub>2</sub>, EtOAc/hexane, 1:19 v/v) to afford **12ab** (87.7 mg, 48%) as a yellow solid; mp = 159.4–160.6 °C (CH<sub>2</sub>Cl<sub>2</sub>/hexane).

$^1\text{H}$  NMR (400 MHz,  $\text{CDCl}_3$ ):  $\delta$  8.31 (d,  $J = 8.4$  Hz, 1H), 8.21 (d,  $J = 8.0$  Hz, 1H), 8.13 (d,  $J = 8.4$  Hz, 1H), 7.71 (td,  $J = 7.6, 1.6$  Hz, 1H), 7.70 (d,  $J = 16.4$  Hz, 1H), 7.63 (d,  $J = 8.8$  Hz, 2H), 7.53 (td,  $J = 7.6, 0.8$  Hz, 1H), 7.43 (td,  $J = 7.6, 1.2$  Hz, 1H), 7.38 (d,  $J = 8.0$  Hz, 1H), 7.21–7.14 (m, 2H), 7.01 (d,  $J = 8.8$  Hz, 2H), 3.97 (s, 3H), 3.88 (s, 3H);  $^{13}\text{C}$  NMR (100 MHz,  $\text{CDCl}_3$ ):  $\delta$  160.1, 152.5, 146.8, 142.8, 139.5, 137.5, 129.4, 128.7, 128.2 (2C), 127.8, 127.5, 125.5, 123.7, 123.0, 122.7, 121.0, 120.4, 119.8, 114.9, 114.4 (2C), 108.5, 55.4, 27.6 ppm; IR (ATR): 3063, 2929, 1635, 1591, 1474, 1395, 1252 (-C-O-C-)  $\text{cm}^{-1}$ ; HRMS (ESI-TOF)  $m/z$ :  $[\text{M}+\text{H}]^+$  calcd for  $\text{C}_{25}\text{H}_{21}\text{N}_2\text{O}$  365.1648; found 365.1645.

**(E)-11-Methyl-6-(4-nitrostyryl)-11H-indolo[3,2-c]quinoline (12ac)**

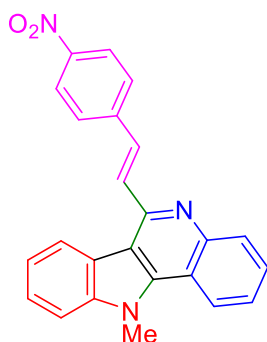

Prepared according to standard reaction conditions. Purification by column chromatography ( $\text{SiO}_2$ , EtOAc/hexane, 1:19 v/v) to afford **12ac** (77.4 mg, 38%) as a orange solid; mp = 230.9–232.4  $^\circ\text{C}$  ( $\text{CH}_2\text{Cl}_2$ /hexane).

$^1\text{H}$  NMR (400 MHz,  $\text{CDCl}_3$ ):  $\delta$  8.36 (d,  $J = 8.8$  Hz, 2H), 8.27 (d,  $J = 7.6$ , 1H), 8.18 (d,  $J = 8.0$  Hz, 1H), 8.14 (d,  $J = 7.8$  Hz, 1H), 8.08 (d,  $J = 16.8$  Hz, 1H), 7.84 (d,  $J = 8.4$  Hz, 2H), 7.76 (ddd,  $J = 8.3, 6.9, 1.3$  Hz, 1H), 7.59 (dt,  $J = 7.8, 0.8$  Hz, 1H), 7.49 (dt,  $J = 7.6, 1.2$  Hz, 1H), 7.45 (d,  $J = 8.4$  Hz, 1H), 7.30 (d,  $J = 16.8$  Hz, 1H), 7.23 (dt,  $J = 7.6, 0.8$  Hz, 1H), 4.02 (s, 3H);  $^{13}\text{C}$  NMR (100 MHz,  $\text{CDCl}_3$ ):  $\delta$  152.4, 147.6, 146.8, 143.1, 142.7, 137.5, 135.7, 129.0, 128.1 (2C), 127.6, 127.4 (2C), 125.0, 124.5 (2C), 123.4, 123.2, 122.5, 120.5, 120.0, 115.1, 108.8, 27.7 ppm; IR (ATR): 3057, 2919, 1580, 1489 (-NO), 1471, 1392, 1342 (-NO)  $\text{cm}^{-1}$ ; HRMS (ESI-TOF)  $m/z$ :  $[\text{M}+\text{H}]^+$  calcd for  $\text{C}_{24}\text{H}_{18}\text{N}_3\text{O}_2$  380.1394; found 380.1392.

### 11-Methyl-2,6-di(*E*-styryl)-11*H*-indolo[3,2-*c*]quinoline (12na)

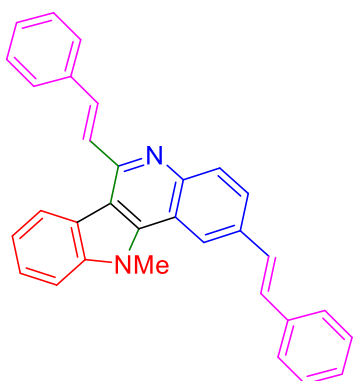

Prepared according to standard reaction conditions. Purification by column chromatography (SiO<sub>2</sub>, EtOAc/hexane, 1:19 v/v) to afford **12na** (50.1 mg, 23%) as a yellow solid; mp = 206.5–207.8 °C (CH<sub>2</sub>Cl<sub>2</sub>/hexane).

<sup>1</sup>H NMR (400 MHz, CDCl<sub>3</sub>): δ 8.25 (br dd, *J* = 9.4, 2.0 Hz, 2H), 8.12 (d, *J* = 8.8 Hz, 1H), 8.03 (dd, *J* = 9.0, 1.8 Hz, 1H), 7.90 (d, *J* = 16.8 Hz, 1H), 7.75 (d, *J* = 7.2 Hz, 2H), 7.57–7.51 (m, 5H), 7.46–7.34 (m, 4H), 7.30–7.18 (m, 5H), 4.00 (s, 3H); <sup>13</sup>C NMR (100 MHz, CDCl<sub>3</sub>): δ 152.4, 146.7, 142.8, 139.0, 138.1, 137.5, 136.6, 131.9, 129.1 (2C), 128.9, 128.8, 128.7 (2C), 128.3, 128.2, 127.7, 127.5, 127.0 (2C), 126.5 (2C), 126.0, 124.6, 123.7, 123.0, 122.7, 120.9, 120.0, 115.3, 108.6, 27.7 ppm; IR (ATR): 3024, 2919, 1586, 1472, 1391 cm<sup>-1</sup>; HRMS (ESI-TOF) *m/z*: [M+H]<sup>+</sup> calcd for C<sub>32</sub>H<sub>25</sub>N<sub>2</sub> 437.2013; found 437.2012.

### 11-Methyl-6-(piperidin-1-yl)-11*H*-indolo[3,2-*c*]quinoline (13a)

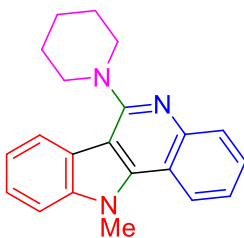

Prepared according to standard reaction conditions. Purification by column chromatography (SiO<sub>2</sub>, CH<sub>2</sub>Cl<sub>2</sub>/hexane, 3:2 v/v) to afford **13a** (93.8 mg, 60%) as a yellow solid; mp = 128.7–130.5 °C (chloroform/hexane).

<sup>1</sup>H NMR (400 MHz, CDCl<sub>3</sub>): δ 8.52 (d, *J* = 7.6 Hz, 1H), 8.46 (d, *J* = 8.4 Hz, 1H), 8.12 (d, *J* = 8.4 Hz, 1H), 7.67 (td, *J* = 7.6, 1.2 Hz, 1H), 7.55 (t, *J* = 7.6 Hz, 1H), 7.43–7.37 (m, 2H), 7.31 (t, *J* = 7.6 Hz, 1H), 3.96 (s, 3H), 3.54 (t, *J* = 5.2 Hz, 4H), 1.97–1.85 (m, 6H); <sup>13</sup>C NMR (100 MHz, CDCl<sub>3</sub>): δ 154.5, 152.2, 148.4, 142.4, 128.5, 128.1, 127.2, 125.2, 124.9, 123.9, 121.8, 120.3, 119.6, 114.5, 108.2, 51.9 (2C), 27.8, 27.1 (2C), 24.7 ppm; IR (ATR): 3051, 2929,

1620, 1587, 1475, 1392  $\text{cm}^{-1}$ ; HRMS (ESI-TOF)  $m/z$ :  $[\text{M}+\text{H}]^+$  calcd for  $\text{C}_{21}\text{H}_{22}\text{N}_3$  316.1808; found 316.1806.

### 9. Photophysical properties of 7a, 10ab, 10nb, 12aa and 12na

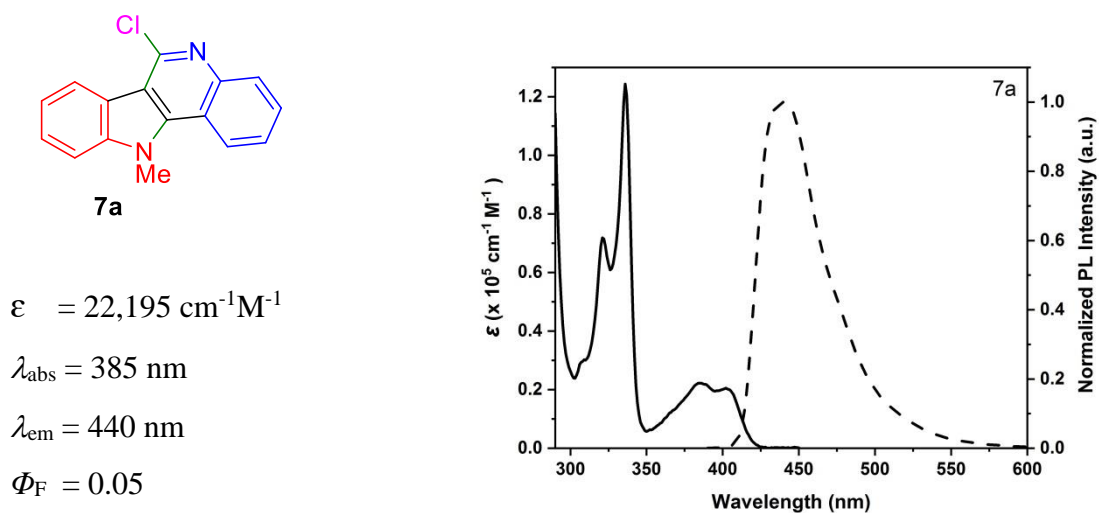

**Figure S1.** UV-vis absorption spectra (solid line) and fluorescence spectra (dashed line) observed for compound **7a** in  $\text{CHCl}_3$  solution.

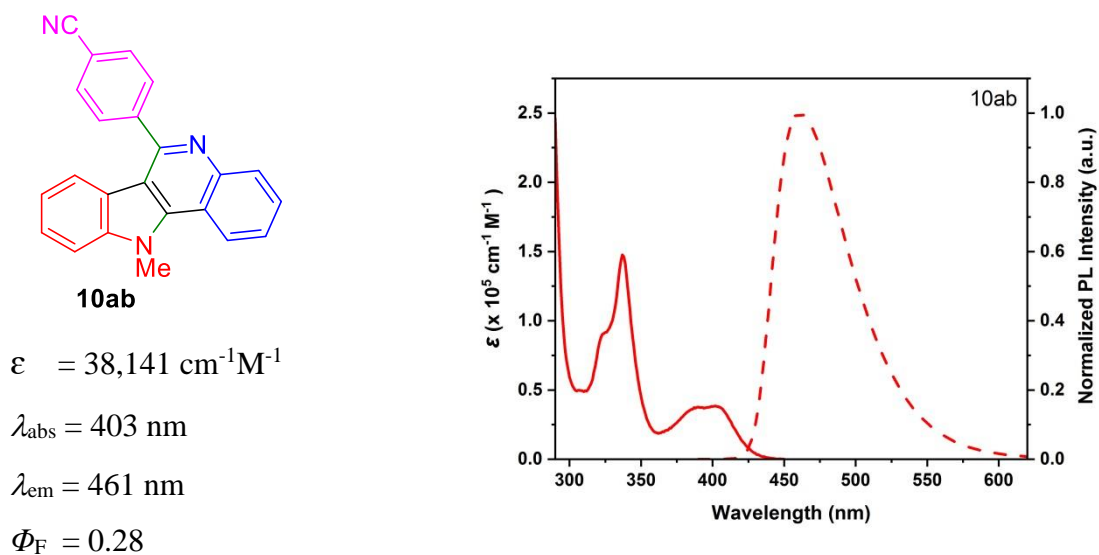

**Figure S2.** UV-vis absorption spectra (solid line) and fluorescence spectra (dashed line) observed for compound **10ab** in  $\text{CHCl}_3$  solution.

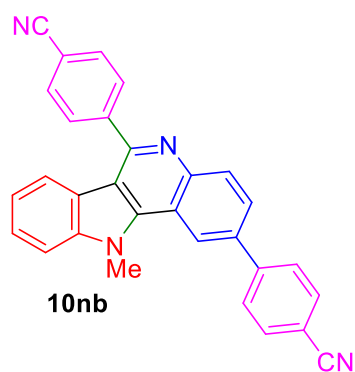

$$\varepsilon = 46,783 \text{ cm}^{-1}\text{M}^{-1}$$

$$\lambda_{\text{abs}} = 410 \text{ nm}$$

$$\lambda_{\text{em}} = 466 \text{ nm}$$

$$\Phi_{\text{F}} = 0.42$$

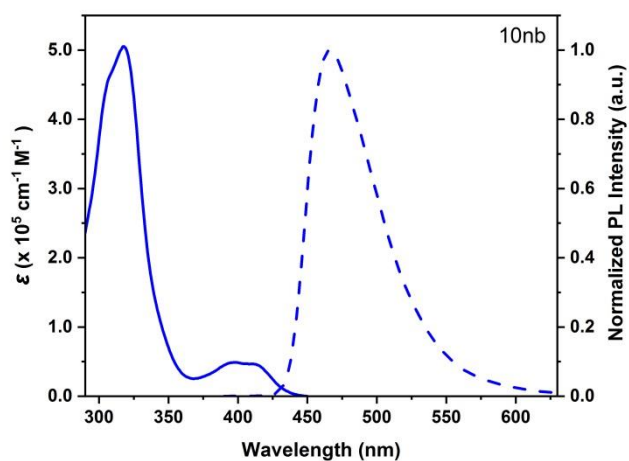

**Figure S3.** UV–vis absorption spectra (solid line) and fluorescence spectra (dashed line) observed for compound **10nb** in  $\text{CHCl}_3$  solution.

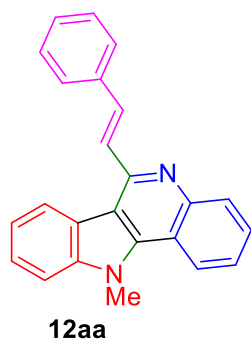

$$\varepsilon = 51,417 \text{ cm}^{-1}\text{M}^{-1}$$

$$\lambda_{\text{abs}} = 405 \text{ nm}$$

$$\lambda_{\text{em}} = 486 \text{ nm}$$

$$\Phi_{\text{F}} = 0.19$$

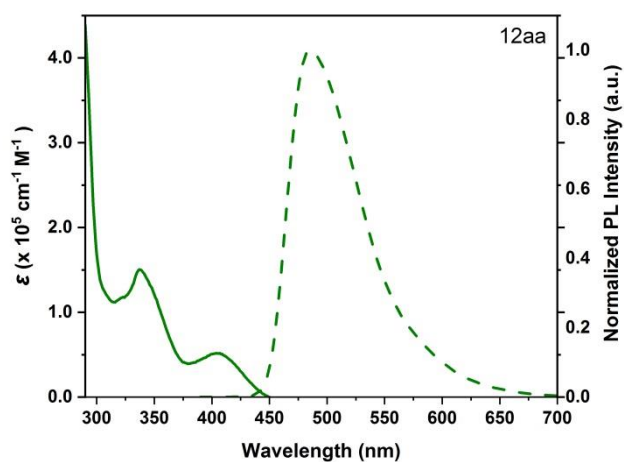

**Figure S4.** UV–vis absorption spectra (solid line) and fluorescence spectra (dashed line) observed for compound **12aa** in  $\text{CHCl}_3$  solution.

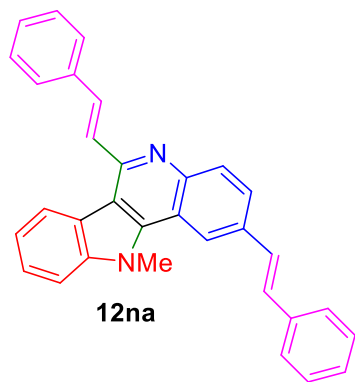

$$\varepsilon = 51,935 \text{ cm}^{-1}\text{M}^{-1}$$

$$\lambda_{\text{abs}} = 440 \text{ nm}$$

$$\lambda_{\text{em}} = 546 \text{ nm}$$

$$\Phi_{\text{F}} = 0.56$$

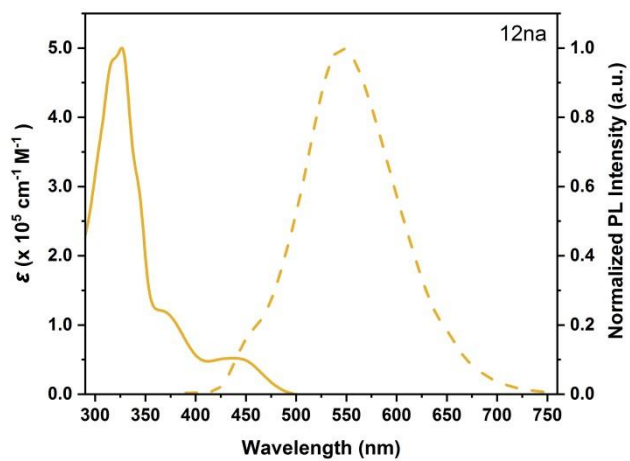

**Figure S5.** UV-vis absorption spectra (solid line) and fluorescence spectra (dashed line) observed for compound **12na** in  $\text{CHCl}_3$  solution.

## 10. Computation details

Density functional theory (DFT) and time-dependent density functional theory (TD-DFT) calculations were carried out to elucidate electronic structures and electronic transition energies of **10ab**, **10nb**, **12aa**, and **12na** using Gaussian 16 package.<sup>10</sup> Ground-state geometry optimizations were calculated in gas phase with B3LYP functional<sup>11-13</sup> and 6-31++G(d,p)<sup>14-19</sup> basis set. The true minima nature of each stationary point was verified with the frequency calculations (no presence of imaginary-frequency mode). The TD-DFT was performed for ten singlet excited states using CPCM solvation model<sup>20</sup> using B3LYP/6-311++G(d,p)<sup>14-19</sup> in CHCl<sub>3</sub>. Molecular orbitals were plotted and visualized using Multiwfn<sup>21</sup> program and VMD<sup>22</sup> program, respectively. In general, the calculated absorption wavelengths shift slightly from the experimental absorption wavelength (~ 20–40 nm), similar to what found in other works.<sup>23-26</sup>

**Table S1.** Calculated electronic transition energies (in eV and nm) and oscillator strength ( $f$ ) of **12ab**, **12n**, **14aa**, and **14n** using B3LYP/6-311++G(d,p).

|             | Calculation                    |                 |             |                                          |       | Experiment                  |              |
|-------------|--------------------------------|-----------------|-------------|------------------------------------------|-------|-----------------------------|--------------|
|             | Band assignment                |                 | Energy (eV) | $\lambda_{\text{abs}}$ (nm) <sup>a</sup> | $f^b$ | $\lambda_{\text{abs}}$ (nm) | $\epsilon^c$ |
| <b>10ab</b> | H-1 $\rightarrow$ L+0 (90.26%) | CT              | 3.57        | 347.2                                    | 0.088 | 389                         | 37545        |
|             | H-0 $\rightarrow$ L+0 (94.28%) | CT              | 3.38        | 366.5                                    | 0.078 |                             |              |
| <b>10nb</b> | H-1 $\rightarrow$ L+0 (88.73%) | CT              | 3.42        | 362.3                                    | 0.184 | 397                         | 49045        |
|             | H-0 $\rightarrow$ L+0 (96.31%) | CT              | 3.20        | 386.8                                    | 0.377 |                             |              |
| <b>12aa</b> | H-1 $\rightarrow$ L+0 (86.68%) | CT              | 3.32        | 373.4                                    | 0.351 | 405                         | 51417        |
|             | H-0 $\rightarrow$ L+0 (92.04%) | $\pi$ - $\pi^*$ | 3.23        | 383.8                                    | 0.410 |                             |              |
| <b>12na</b> | H-1 $\rightarrow$ L+0 (82.69%) | CT              | 3.15        | 393.7                                    | 0.209 | 440                         | 51935        |
|             | H-0 $\rightarrow$ L+0 (88.73%) | $\pi$ - $\pi^*$ | 2.78        | 446.2                                    | 1.350 |                             |              |

<sup>a</sup>Absorption wavelength. <sup>b</sup>Oscillation strength. <sup>c</sup>Molar extinction coefficient



## Cartesian coordinates

### 10ab

Total atom = 41

|   |             |             |             |
|---|-------------|-------------|-------------|
| C | 0.80669408  | 2.59061652  | -0.26524393 |
| C | -0.33535087 | 1.78816954  | -0.09421106 |
| C | -1.60698785 | 2.41508151  | -0.01841159 |
| C | 0.66704620  | 3.97355853  | -0.32609323 |
| C | -0.59955548 | 4.57641327  | -0.21890664 |
| C | -1.75032869 | 3.80738354  | -0.06763545 |
| C | -0.58405579 | 0.36221660  | -0.01442212 |
| N | -2.59340575 | 1.43350671  | 0.08319229  |
| C | -1.98532186 | 0.18986298  | 0.06796277  |
| C | -4.01776927 | 1.72138832  | 0.12836782  |
| C | 0.24406905  | -0.79774758 | -0.05583407 |
| N | -0.26251731 | -2.01659651 | -0.10493719 |
| C | -1.61714083 | -2.19399193 | -0.04322089 |
| C | -2.56264008 | -1.11882635 | 0.08309490  |
| C | -3.94157380 | -1.44776863 | 0.19157283  |
| C | -4.36634143 | -2.76223759 | 0.15646951  |
| C | -3.43593730 | -3.81461211 | 0.01164432  |
| C | -2.08976028 | -3.53142884 | -0.08253720 |
| H | 1.78812415  | 2.14274624  | -0.35983930 |
| H | 1.54686151  | 4.59533345  | -0.45960189 |
| H | -0.68569994 | 5.65794367  | -0.26176480 |
| H | -2.71967902 | 4.28890889  | 0.00239120  |
| H | -4.46249040 | 1.37956943  | 1.06796810  |
| H | -4.53896192 | 1.25580271  | -0.71309064 |
| H | -4.16183379 | 2.79828023  | 0.05859532  |
| H | -4.68406894 | -0.67139896 | 0.30990345  |
| H | -5.42582240 | -2.98424366 | 0.24301786  |
| H | -3.78166469 | -4.84360513 | -0.01693044 |
| H | -1.34699626 | -4.31646996 | -0.17961353 |
| C | 4.54349794  | -0.75144304 | 0.09171538  |

|   |            |             |             |
|---|------------|-------------|-------------|
| C | 3.87329241 | -1.49668541 | -0.89491482 |
| C | 2.48284781 | -1.49396038 | -0.94017536 |
| C | 3.80268588 | -0.00863316 | 1.02718045  |
| C | 2.41192122 | -0.00118506 | 0.96095625  |
| C | 1.73486177 | -0.73687545 | -0.02437972 |
| C | 5.97723891 | -0.75344100 | 0.14750597  |
| N | 7.14063805 | -0.75344048 | 0.19178169  |
| H | 4.44590698 | -2.07446037 | -1.61280963 |
| H | 1.96006144 | -2.08509420 | -1.68412149 |
| H | 4.31907316 | 0.55151279  | 1.79967659  |
| H | 1.84583453 | 0.56576110  | 1.69305692  |

### 10nb

Total atom = 52

|   |             |             |             |
|---|-------------|-------------|-------------|
| C | 3.63903028  | 2.35634977  | -0.27510493 |
| C | 2.29335683  | 1.96799923  | -0.14809471 |
| C | 1.29074100  | 2.97239509  | -0.12313292 |
| C | 3.95528612  | 3.70928248  | -0.34283892 |
| C | 2.94804700  | 4.68995292  | -0.28595228 |
| C | 1.60596064  | 4.33576427  | -0.17922475 |
| C | 1.59477662  | 0.69974379  | -0.07644942 |
| N | 0.03641165  | 2.36314007  | -0.05923716 |
| C | 0.21060263  | 0.99073612  | -0.04711410 |
| C | -1.21867634 | 3.09712949  | -0.08499750 |
| C | 2.00602188  | -0.66522680 | -0.08730682 |
| N | 1.13444510  | -1.65667257 | -0.16164593 |
| C | -0.20332620 | -1.38526161 | -0.14950015 |
| C | -0.75705814 | -0.06385946 | -0.04666823 |
| C | -2.16725938 | 0.07206559  | 0.02278047  |
| C | -3.01700997 | -1.02668674 | -0.03527613 |
| C | -2.45203375 | -2.32371577 | -0.16808442 |
| C | -1.08730041 | -2.49285930 | -0.21558001 |
| C | 6.07993110  | -2.00649786 | 0.23340080  |
| C | 5.24302564  | -2.50956194 | -0.77868704 |

|   |             |             |             |
|---|-------------|-------------|-------------|
| C | 3.93062855  | -2.05928242 | -0.88003583 |
| C | 5.58418409  | -1.05100498 | 1.13720266  |
| C | 4.27411227  | -0.59562440 | 1.01464059  |
| C | 3.43373769  | -1.08791732 | 0.00369444  |
| C | 7.43316104  | -2.46991607 | 0.34697794  |
| N | 8.53173666  | -2.84415569 | 0.43825064  |
| H | 4.42612126  | 1.61468658  | -0.33024977 |
| H | 4.99289004  | 4.01234385  | -0.44223335 |
| H | 3.21756660  | 5.74066260  | -0.33271129 |
| H | 0.84231962  | 5.10522181  | -0.14648743 |
| H | -1.78062132 | 2.95846593  | 0.84386875  |
| H | -1.83455787 | 2.79012644  | -0.93499204 |
| H | -1.00363613 | 4.15876581  | -0.19372418 |
| H | -2.61278049 | 1.05324150  | 0.10081307  |
| H | -3.10359083 | -3.19161572 | -0.19370592 |
| H | -0.64256504 | -3.48005134 | -0.28551524 |
| H | 5.62512759  | -3.25127805 | -1.47212522 |
| H | 3.27380757  | -2.46073335 | -1.64395108 |
| H | 6.22423170  | -0.67673329 | 1.92925186  |
| H | 3.89450339  | 0.13397160  | 1.72273937  |
| C | -5.34704881 | -1.62134275 | -0.77137179 |
| C | -6.72748799 | -1.45707198 | -0.71911678 |
| C | -7.28986974 | -0.50731626 | 0.15133679  |
| C | -4.48903285 | -0.84949373 | 0.03458414  |
| C | -5.06818484 | 0.09248952  | 0.90568947  |
| C | -6.44681656 | 0.26768992  | 0.96661263  |
| C | -8.71200417 | -0.33120206 | 0.20931435  |
| N | -9.86615960 | -0.18582113 | 0.25600173  |
| H | -4.92652815 | -2.34180416 | -1.46569154 |
| H | -7.37455075 | -2.05286532 | -1.35427418 |
| H | -4.43160071 | 0.67434887  | 1.56480505  |
| H | -6.87813857 | 0.99127118  | 1.65041276  |

**12aa**

Total atom = 44

|   |             |             |             |
|---|-------------|-------------|-------------|
| C | -0.13241034 | 2.92472723  | -0.14437051 |
| C | -1.05268132 | 1.86489848  | -0.04825430 |
| C | -2.43979324 | 2.17449539  | -0.01816789 |
| C | -0.59402996 | 4.23723297  | -0.18347731 |
| C | -1.97060694 | 4.51913074  | -0.13589333 |
| C | -2.90885338 | 3.49307174  | -0.05811470 |
| C | -0.96112578 | 0.41911111  | 0.00672986  |
| N | -3.16898505 | 0.98837868  | 0.03975641  |
| C | -2.28326021 | -0.07773229 | 0.03460714  |
| C | -4.61835487 | 0.93540899  | 0.12987667  |
| C | 0.12796850  | -0.50865509 | 0.04206124  |
| N | -0.08601591 | -1.81748487 | 0.04981281  |
| C | -1.35649204 | -2.30597457 | 0.03100094  |
| C | -2.53842469 | -1.48445637 | 0.03183111  |
| C | -3.80588962 | -2.12767749 | 0.00768975  |
| C | -3.90850341 | -3.50563439 | -0.00690224 |
| C | -2.74761896 | -4.31073505 | 0.00259656  |
| C | -1.50261673 | -3.71994930 | 0.02084664  |
| C | 2.58507951  | -0.86432955 | -0.07353904 |
| C | 1.52272135  | -0.04859937 | 0.09550324  |
| H | 0.93260096  | 2.73893605  | -0.20753646 |
| H | 0.11831536  | 5.05294617  | -0.25966529 |
| H | -2.31090727 | 5.54967152  | -0.17050010 |
| H | -3.96804554 | 3.72623892  | -0.04092756 |
| H | -4.93192723 | 0.34399748  | 0.99420585  |
| H | -5.06303609 | 0.51702633  | -0.77911116 |
| H | -5.00044359 | 1.94664147  | 0.26190247  |
| H | -4.71677843 | -1.54607075 | -0.01068856 |
| H | -4.89021326 | -3.96946258 | -0.02835748 |
| H | -2.83887947 | -5.39294954 | -0.00673771 |
| H | -0.59214694 | -4.31030901 | 0.02673256  |
| H | 1.67688543  | 1.00474691  | 0.29313758  |

|   |            |             |             |
|---|------------|-------------|-------------|
| H | 2.37397482 | -1.91005265 | -0.28517993 |
| C | 4.96534688 | -1.46621381 | -0.35382156 |
| C | 4.00220947 | -0.49643651 | -0.01225505 |
| C | 4.46203635 | 0.77914800  | 0.37638930  |
| C | 6.32978880 | -1.17591217 | -0.32122796 |
| C | 6.76579990 | 0.09515469  | 0.05985766  |
| C | 5.82333797 | 1.07001825  | 0.41018290  |
| H | 4.63173531 | -2.45724746 | -0.65039576 |
| H | 3.75055592 | 1.54673605  | 0.66461253  |
| H | 7.05097246 | -1.94185747 | -0.59184916 |
| H | 7.82676631 | 0.32529492  | 0.08902018  |
| H | 6.15381429 | 2.05890736  | 0.71545869  |

### 12na

Total atom = 58

|   |             |             |             |
|---|-------------|-------------|-------------|
| C | 3.26005096  | 2.99105389  | -0.19628804 |
| C | 1.99735535  | 2.37887733  | -0.09509875 |
| C | 0.84366308  | 3.20887331  | -0.07326502 |
| C | 3.35093114  | 4.37897084  | -0.24851585 |
| C | 2.19574330  | 5.17947371  | -0.20950702 |
| C | 0.92984065  | 4.60524445  | -0.12716297 |
| C | 1.51334447  | 1.01394475  | -0.02862921 |
| N | -0.29300354 | 2.40526210  | -0.00866855 |
| C | 0.10260959  | 1.07699224  | -0.00471307 |
| C | -1.64445968 | 2.92901825  | 0.09573165  |
| C | 2.15199541  | -0.26609608 | 0.02356063  |
| N | 1.44005021  | -1.38656694 | 0.03745194  |
| C | 0.08291390  | -1.33618123 | 0.00939194  |
| C | -0.68598425 | -0.11793023 | -0.00264373 |
| C | -2.09771408 | -0.20507011 | -0.04603615 |
| C | -2.76643769 | -1.42836749 | -0.05638674 |
| C | -1.98766438 | -2.62008457 | -0.04428706 |
| C | -0.61446520 | -2.57388954 | -0.00927265 |
| C | 8.49043105  | -2.32048266 | 0.14679487  |

|   |              |             |             |
|---|--------------|-------------|-------------|
| C | 7.59152691   | -3.33044848 | -0.20380091 |
| C | 6.22339512   | -3.06139211 | -0.25566484 |
| C | 8.00595197   | -1.04120628 | 0.44712019  |
| C | 6.64051136   | -0.77393707 | 0.39436256  |
| C | 5.71778896   | -1.77908086 | 0.03624447  |
| C | -7.26490617  | -1.84808956 | -0.37511397 |
| C | -8.65618931  | -1.90865630 | -0.39104509 |
| C | -9.42057531  | -0.81529475 | 0.03413379  |
| C | -6.59400520  | -0.69110754 | 0.07305160  |
| C | -7.38010600  | 0.40158223  | 0.48948646  |
| C | -8.77398618  | 0.34239083  | 0.47304157  |
| H | 4.16664524   | 2.40154029  | -0.25386299 |
| H | 4.32646194   | 4.84853373  | -0.32890924 |
| H | 2.28766888   | 6.26041134  | -0.25526946 |
| H | 0.04706123   | 5.23547559  | -0.11887710 |
| H | -2.16385240  | 2.48767127  | 0.95030479  |
| H | -2.22117601  | 2.74559629  | -0.81711808 |
| H | -1.59361586  | 4.00493062  | 0.25736965  |
| H | -2.68806983  | 0.69754492  | -0.10188202 |
| H | -2.49589379  | -3.58083374 | -0.05904470 |
| H | -0.01751676  | -3.47992906 | 0.00122858  |
| H | 7.95446202   | -4.32767318 | -0.43577368 |
| H | 5.52837542   | -3.85129396 | -0.52841076 |
| H | 8.69732051   | -0.25163697 | 0.72797211  |
| H | 6.28740684   | 0.22199066  | 0.64311043  |
| H | -6.69579721  | -2.70399962 | -0.72398583 |
| H | -9.14899758  | -2.81088295 | -0.74236641 |
| H | -6.88572257  | 1.30642895  | 0.83478240  |
| H | -9.35384120  | 1.19977330  | 0.80285246  |
| H | 9.55603765   | -2.52545249 | 0.19059483  |
| H | -10.50518436 | -0.86600302 | 0.01765310  |
| C | 3.61334616   | -0.39005818 | 0.09054854  |
| C | 4.27114655   | -1.56214343 | -0.04236286 |
| C | -4.22699549  | -1.54885585 | -0.09062530 |

|   |             |             |             |
|---|-------------|-------------|-------------|
| C | -5.13303739 | -0.56957005 | 0.12256200  |
| H | 4.16790833  | 0.52248067  | 0.26918002  |
| H | 3.66745798  | -2.44617119 | -0.23435642 |
| H | -4.58709012 | -2.55635147 | -0.29182658 |
| H | -4.77549262 | 0.42610718  | 0.38148494  |

## 11. References

- 1 O. Khaikate, J. Meesin, M. Pohmakotr, V. Reutrakul, P. Leowanawat, D. Soorukram, C. Kuhakarn, Sulfinates and Thiocyanates Triggered *6-endo* Cyclization of *o*-Alkynylisocyanobenzenes, *Org. Biomol. Chem.*, 2018, **16**, 8553.
- 2 O. Khaikate, N. Inthalaeng, J. Meesin, K. Kantarod, M. Pohmakotr, V. Reutrakul, D. Soorukram, P. Leowanawat, C. Kuhakarn, Synthesis of Indolo- and Benzothieno[2,3-*b*]quinolines by a Cascade Cyclization of *o*-Alkynylisocyanobenzene Derivatives, *J. Org. Chem.*, 2019, **84**, 15131.
- 3 N. Wang, K. Imai, C. Q. Pang, M. q. Wang, M. Yonezawa, Y. Zhang, J. Nokami, T. Inokuchi, Regioselective *N*-Methylation of 6-Chloroindolo[3,2-*c*]quinolines and Their Amination Reactivity at the C-6 Position, *Bull. Chem. Soc. Jpn.*, 2013, **86**, 864.
- 4 Y. L. Chen, C. H. Chung, I. L. Chen, P. H. Chen, H. Y. Jeng, Synthesis and Cytotoxic Activity Evaluation of Indolo-, Pyrrolo-, and Benzofuro-quinolin-2(1*H*)-ones and 6-Anilinoindoloquinoline Derivatives, *Bioorg. Med. Chem.*, 2002, **10**, 2705.
- 5 K. Kobayashi, Y. Izumi, K. Hayashi, O. Morikawa, H. Konishi, Synthesis of 11*H*-Indolo[3,2-*c*]quinoline Derivatives Carrying a Substituent at the 6-Position, *Bull. Chem. Soc. Jpn.*, 2005, **78**, 2171.
- 6 S. Wu, X. Lei, E. Fan, Z. Sun, Thermolysis-Induced Two- or Multicomponent Tandem Reactions Involving Isocyanides and Sulfenic-Acid-Generating Sulfoxides: Access to Diverse Sulfur-Containing Functional Scaffolds, *Org. Lett.*, 2018, **20**, 522.
- 7 C. Cai, J. Y. L. Chung, J. C. McWilliams, Y. Sun, C. S. Shultz, M. Palucki, From High-Throughput Catalyst Screening to Reaction Optimization: Detailed Investigation of Regioselective Suzuki Coupling of 1,6-Naphthyridone Dichloride, *Org. Process Res. Dev.*, 2007, **11**, 328.
- 8 N. Surapanich, C. Kuhakarn, M. Pohmakotr, V. Reutrakul, Palladium-Mediated Heck-Type Reactions of [(Bromodifluoromethyl)sulfonyl]benzene: Synthesis of  $\alpha$ -Alkenyl- and  $\alpha$ -Heteroaryl-Substituted  $\alpha,\alpha$ -Difluoromethyl Phenyl Sulfones, *Eur. J. Org. Chem.*, 2012, **2012**, 5943.
- 9 R. Rzasa, M. Frohn, K. Andrews, S. Chmait, N. Chen, J. Clarine, C. Davis, H. Eastwood, D. Horne, E. Hu, A. Jones, M. Kaller, R. Kunz, S. Miller, H. Monenschein, T. Nguyen, A. Pickrell, A. Porter, A. Reichelt, J. Allen, Synthesis and Preliminary Biological Evaluation of Potent and Selective 2-(3-Alkoxy-1-azetidynyl) Quinolines



- as Novel PDE10A Inhibitors with Improved Solubility, *Bioorg. Med. Chem.*, 2014, **22**, 6570.
- 10 M. J. Frisch, G. W. Trucks, H. B. Schlegel, G. E. Scuseria, M. A. Robb, J. R. Cheeseman, G. Scalmani, V. Barone, G. A. Petersson, H. Nakatsuji, X. Li, M. Caricato, A. V. Marenich, J. Bloino, B. G. Janesko, R. Gomperts, B. Mennucci, H. P. Hratchian, J. V. Ortiz, A. F. Izmaylov, J. L. Sonnenberg, Williams, F. Ding, F. Lipparini, F. Egidi, J. Goings, B. Peng, A. Petrone, T. Henderson, D. Ranasinghe, V. G. Zakrzewski, J. Gao, N. Rega, G. Zheng, W. Liang, M. Hada, M. Ehara, K. Toyota, R. Fukuda, J. Hasegawa, M. Ishida, T. Nakajima, Y. Honda, O. Kitao, H. Nakai, T. Vreven, K. Throssell, J. A. Montgomery Jr., J. E. Peralta, F. Ogliaro, M. J. Bearpark, J. J. Heyd, E. N. Brothers, K. N. Kudin, V. N. Staroverov, T. A. Keith, R. Kobayashi, J. Normand, K. Raghavachari, A. P. Rendell, J. C. Burant, S. S. Iyengar, J. Tomasi, M. Cossi, J. M. Millam, M. Klene, C. Adamo, R. Cammi, J. W. Ochterski, R. L. Martin, K. Morokuma, O. Farkas, J. B. Foresman, D. J. Fox, *Gaussian 16 Rev. C.01*, Wallingford, CT, 2016.
- 11 A. D. Becke, Density-Functional Thermochemistry. III. The Role of Exact Exchange, *J. Chem. Phys.*, 1993, **98**, 5648.
- 12 C. Lee, W. Yang, R. G. Parr, Development of the Colle-Salvetti Correlation-Energy Formula Into a Functional of the Electron Density, *Phys. Rev. B.*, 1988, **37**, 785.
- 13 P. J. Stephens, F. J. Devlin, C. F. Chabalowski, M. J. Frisch, Ab Initio Calculation of Vibrational Absorption and Circular Dichroism Spectra Using Density Functional Force Fields, *J. Phys. Chem.*, 1994, **98**, 11623.
- 14 V. A. Rassolov, J. A. Pople, M. A. Ratner, T. L. Windus, 6-31G\* Basis Set for Atoms K Through Zn, *J. Chem. Phys.*, 1998, **109**, 1223.
- 15 K. B. Wiberg, W. J. Hehre, L. Radom, P. V. R. Schleyer, J. A. Pople, Ab Initio Molecular Orbital Theory, *J. Comput. Chem.*, 1986, **7**, 379.
- 16 T. Clark, J. Chandrasekhar, G. W. Spitznagel, P. V. R. Schleyer, Efficient Diffuse Function-Augmented Basis Sets for Anion Calculations. III. The 3-21+G Basis Set for First-Row Elements, Li-F, *J. Comput. Chem.*, 1983, **4**, 294.
- 17 R. Ditchfield, W. J. Hehre, J. A. Pople, Self-Consistent Molecular-Orbital Methods. IX. An Extended Gaussian-Type Basis for Molecular-Orbital Studies of Organic Molecules, *J. Chem. Phys.*, 1971, **54**, 724.

- 18 W. J. Hehre, R. Ditchfield, J. A. Pople, Self-Consistent Molecular Orbital Methods. XII. Further Extensions of Gaussian-Type Basis Sets for Use in Molecular Orbital Studies of Organic Molecules, *J. Chem. Phys.*, 1972, **56**, 2257.
- 19 P. C. Hariharan, J. A. Pople, The Influence of Polarization Functions on Molecular Orbital Hydrogenation Energies, *Theor. Chim. Acta.*, 1973, **28**, 213.
- 20 V. Barone, M. Cossi, Quantum Calculation of Molecular Energies and Energy Gradients in Solution by a Conductor Solvent Model, *J. Phys. Chem. A.*, 1998, **102**, 1995.
- 21 T. Lu, F. Chen, Multiwfn: a Multifunctional Wavefunction Analyzer, *J. Comput. Chem.*, 2012, **33**, 580.
- 22 W. Humphrey, A. Dalke, K. Schulten, VMD: Visual Molecular Dynamics, *J. Mol. Graph.*, 1996, **14**, 33.
- 23 K. Kantarod, T. Worakul, D. Soorukram, C. Kuhakarn, V. Reutrakul, P. Surawatanawong, W. Wattanathana, P. Leowanawat, Dibenzopleiadiene-Embedded Polyaromatics via [4+3] Annulative Decarbonylation/Decarboxylation, *Org. Chem. Front.*, 2021, **8**, 522.
- 24 S. Wanwong, P. Surawatanawong, S. Khumsubdee, S. Kanchanakungwankul, J. Wootthikanokkhan, Synthesis, Optical, and Electrochemical Properties, and Theoretical Calculations of BODIPY Containing Triphenylamine, *Heteroat. Chem.*, 2016, **27**, 306.
- 25 M. R. Momeni, A. Brown, Why Do TD-DFT Excitation Energies of BODIPY/Aza-BODIPY Families Largely Deviate from Experiment? Answers from Electron Correlated and Multireference Methods, *J. Chem. Theory Comput.*, 2015, **11**, 2619.
- 26 H. Lu, Q. Wang, L. Gai, Z. Li, Y. Deng, X. Xiao, G. Lai, Z. Shen, Tuning the Solid-State Luminescence of BODIPY Derivatives with Bulky Arylsilyl Groups: Synthesis and Spectroscopic Properties, *Chem. Eur. J.*, 2012, **18**, 7852.

## 12. NMR spectra

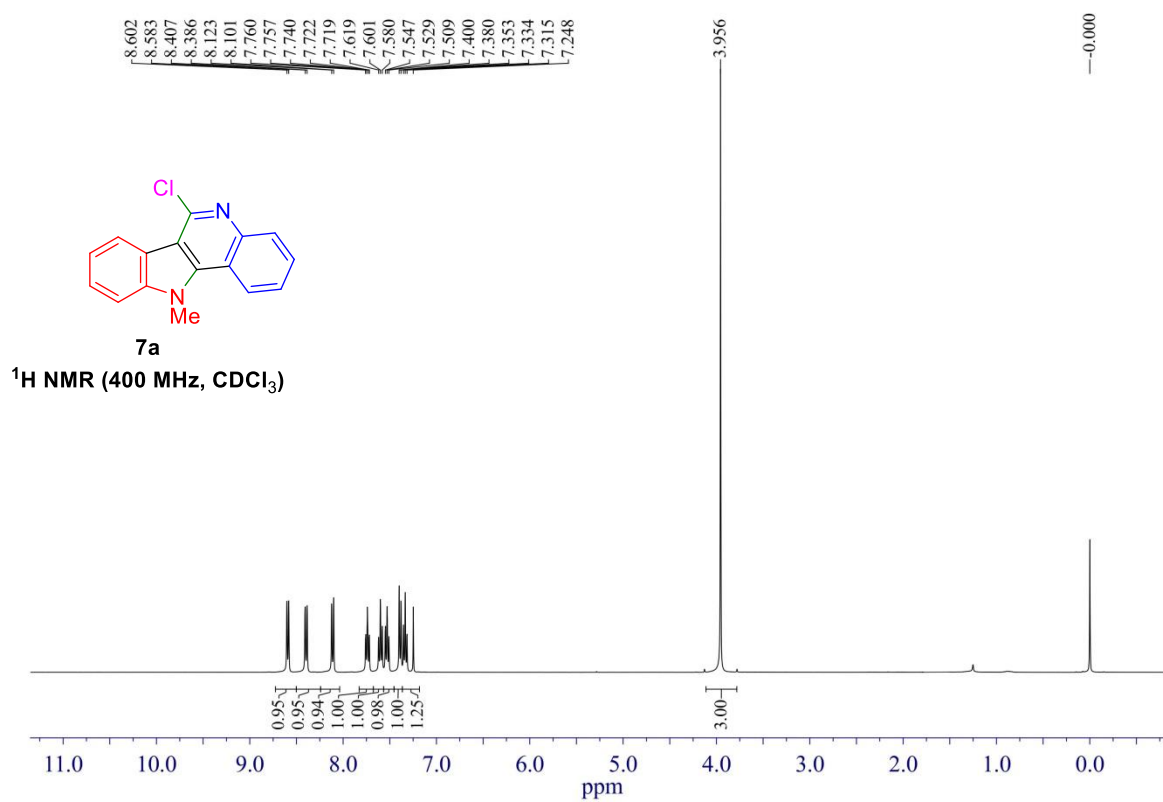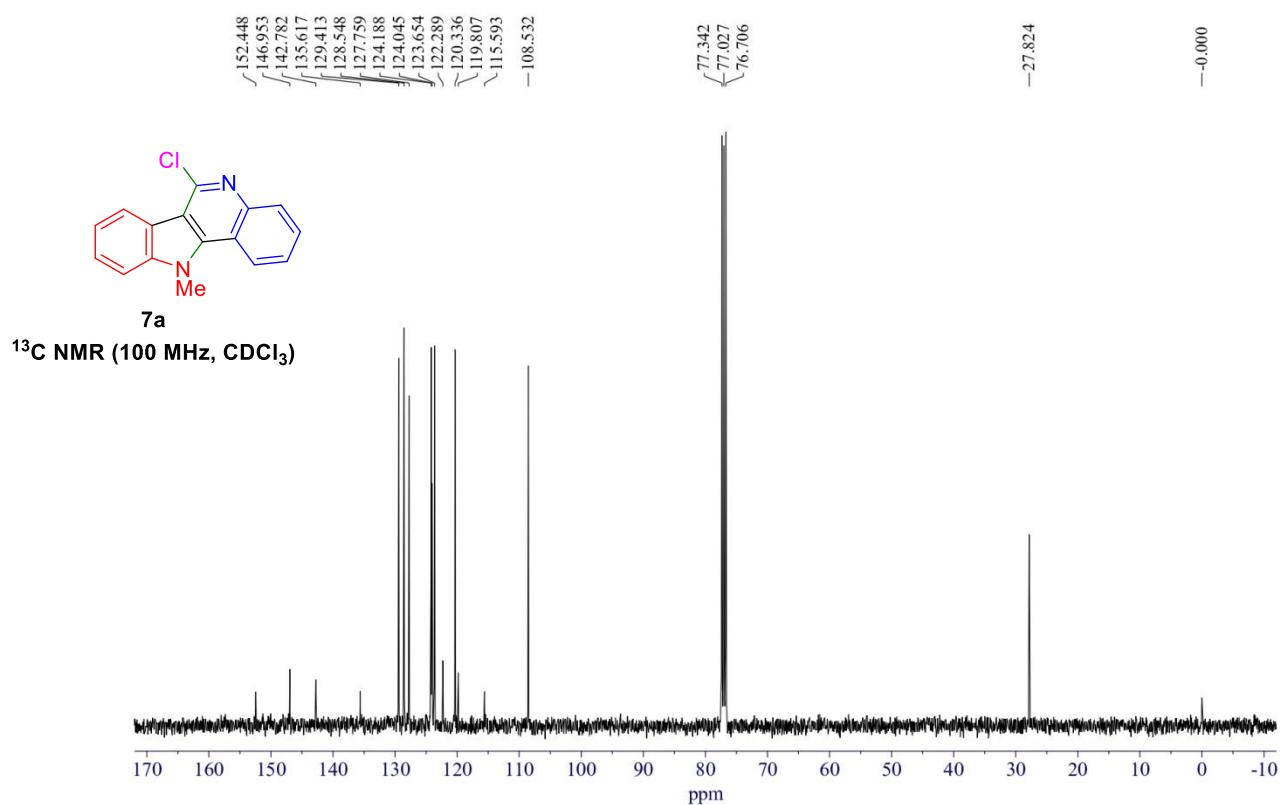

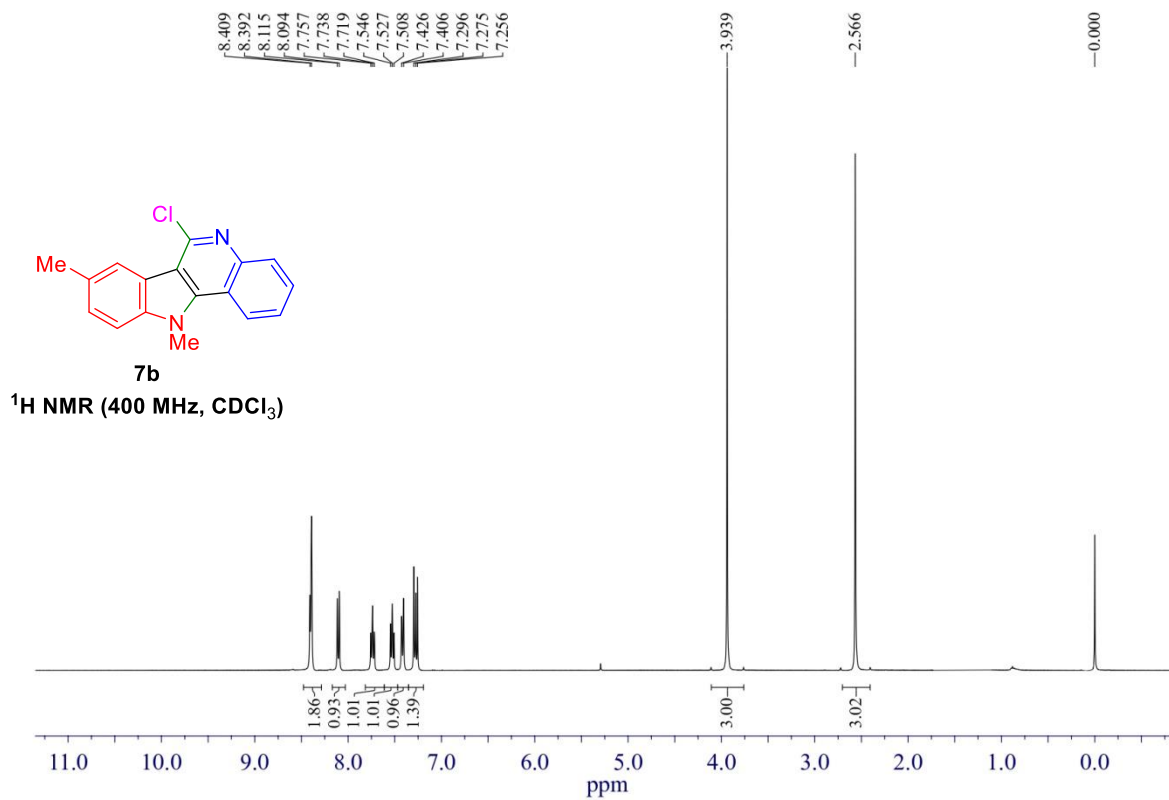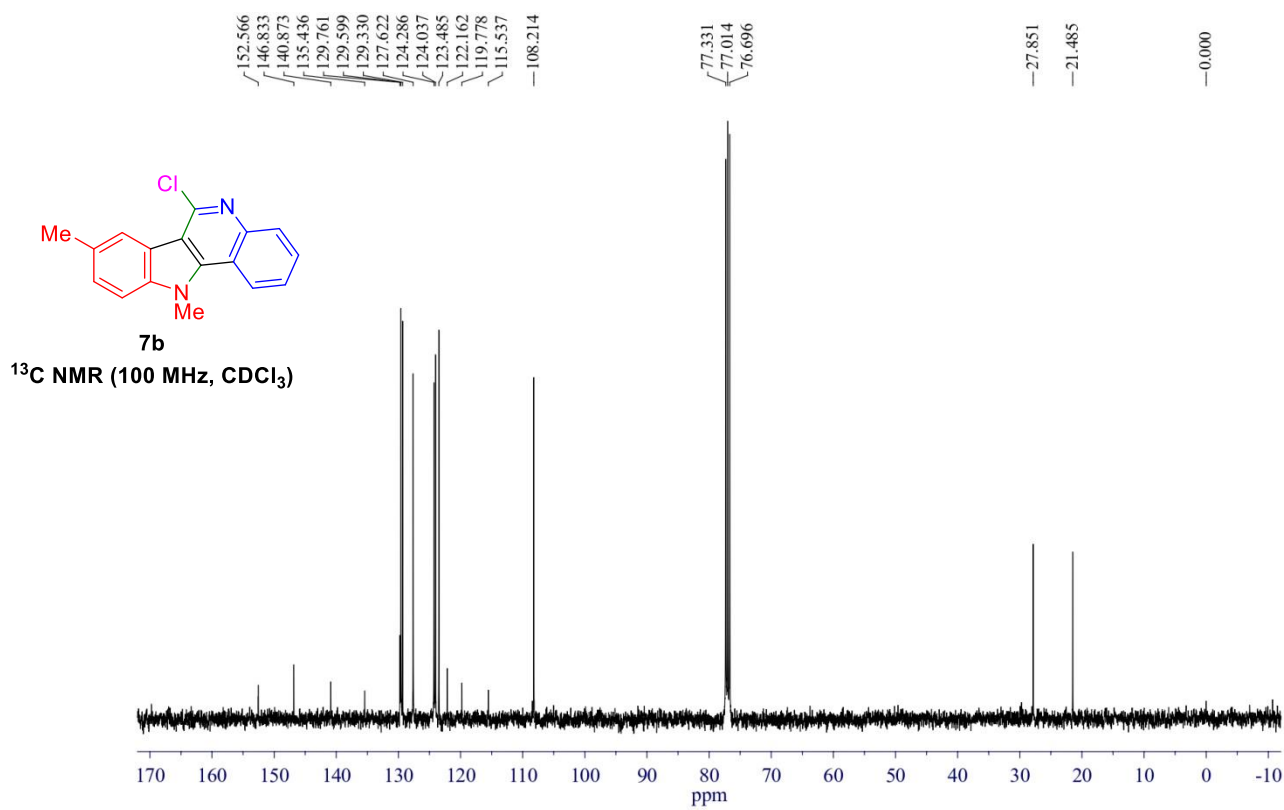

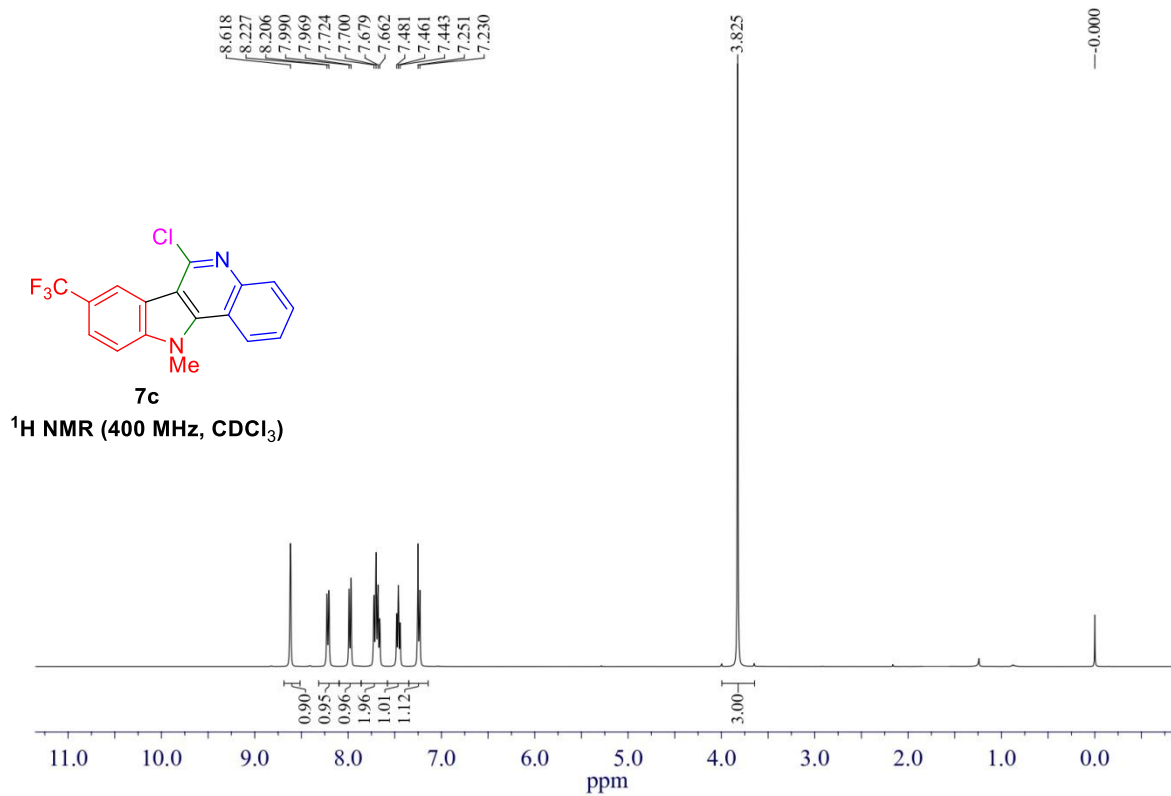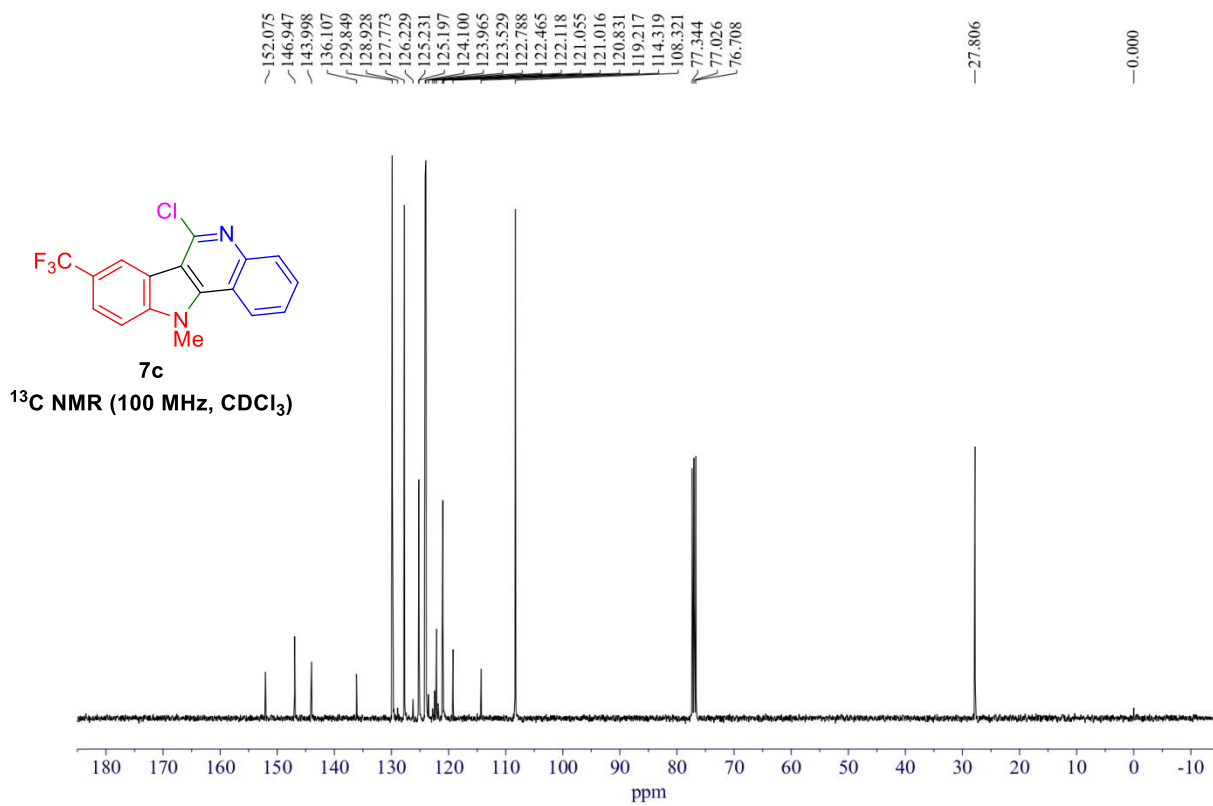

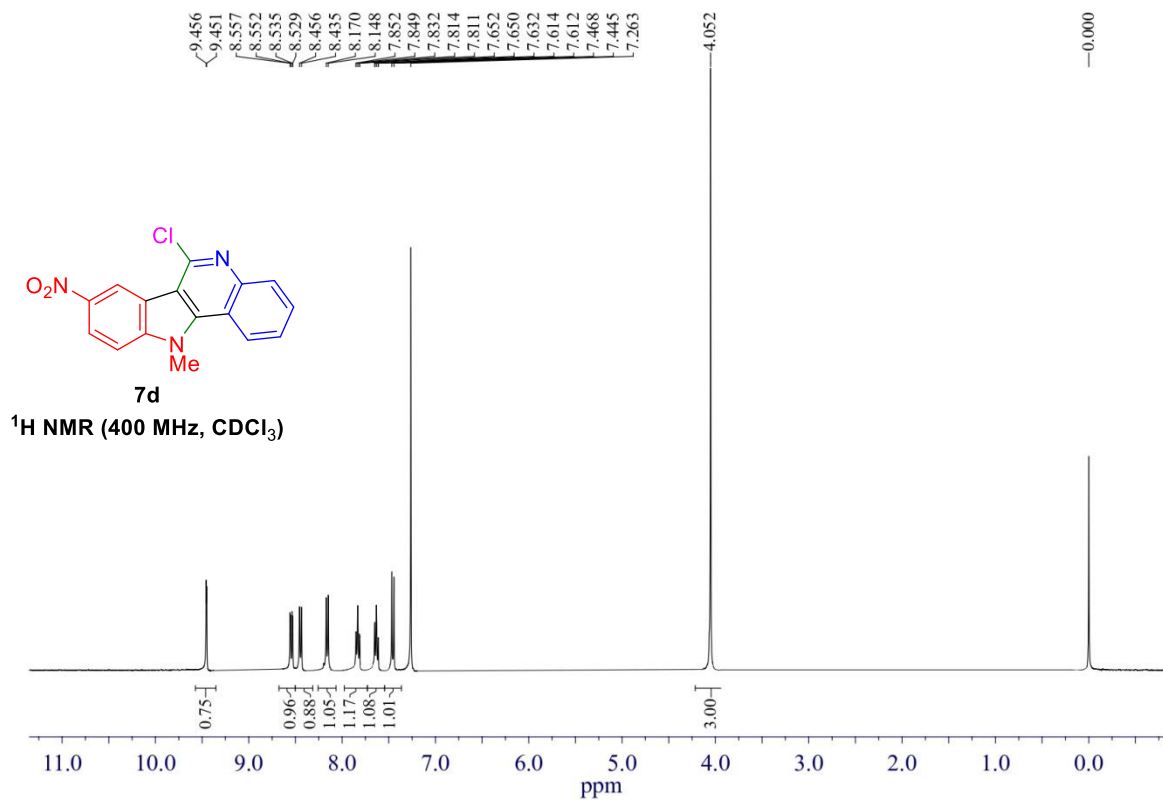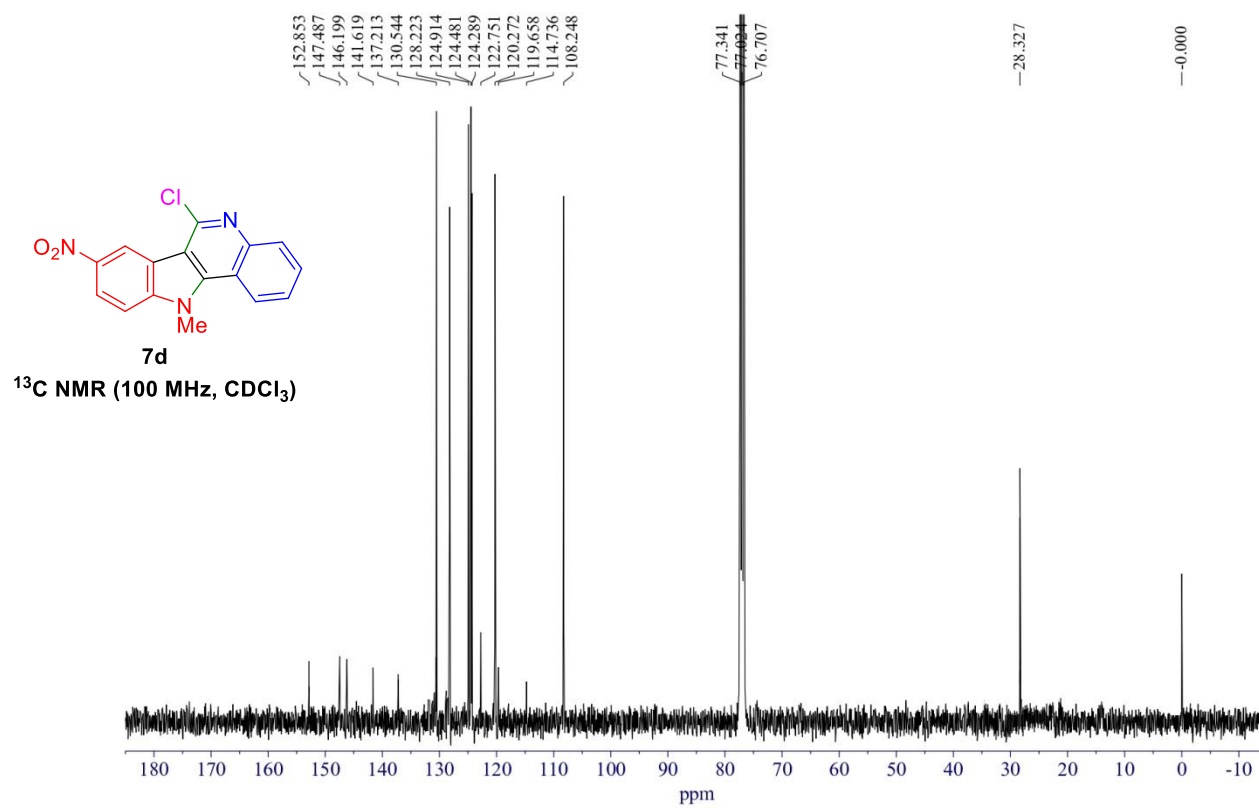

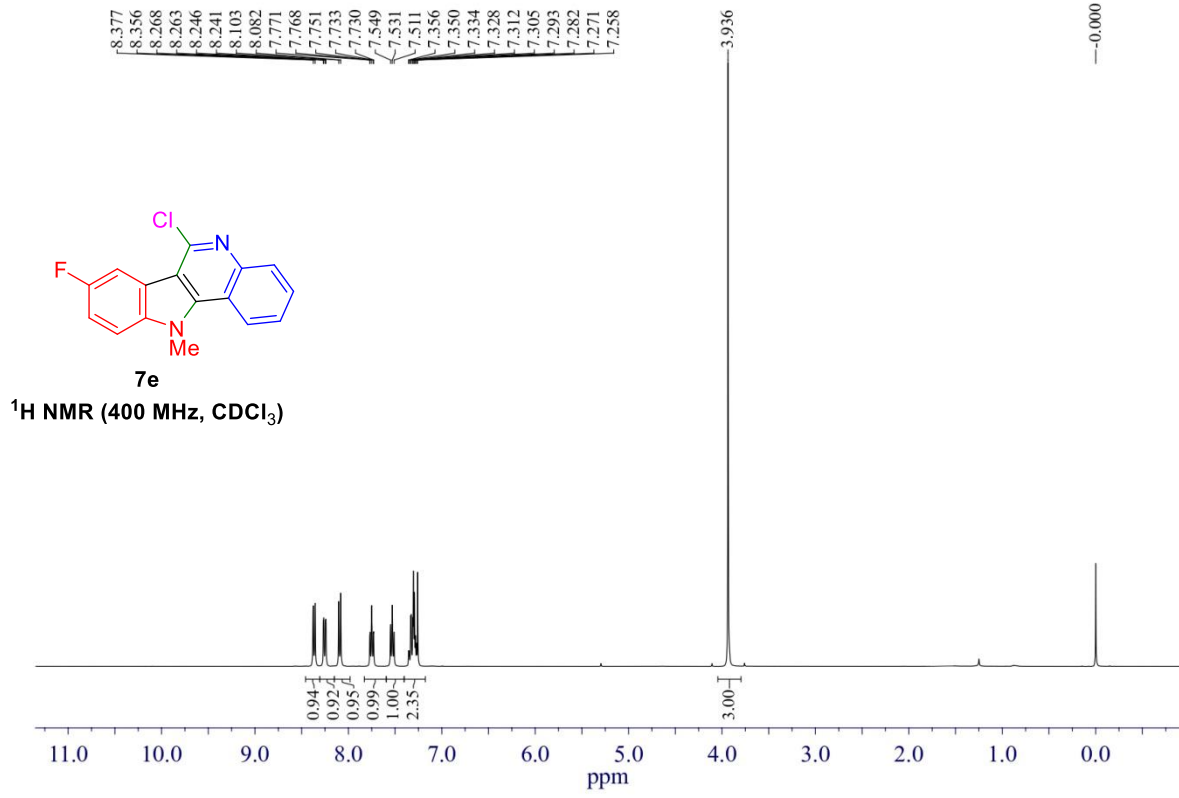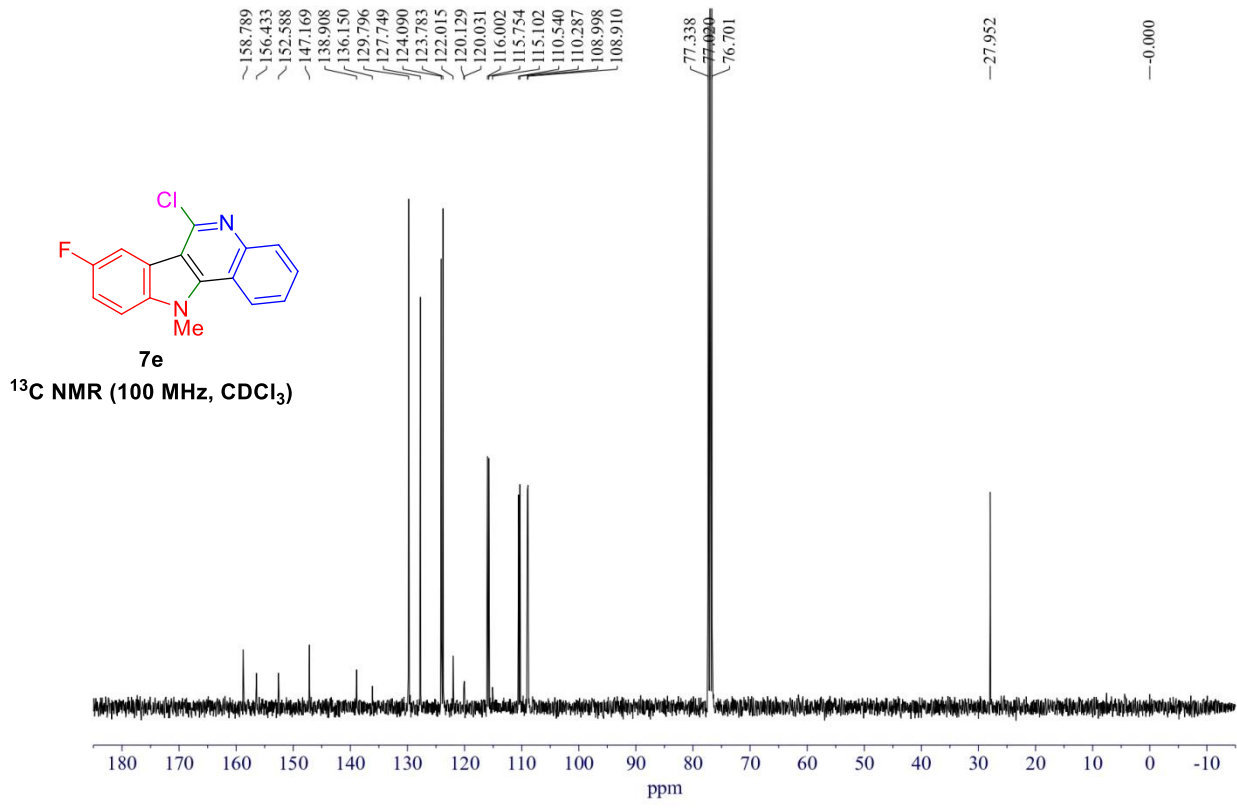

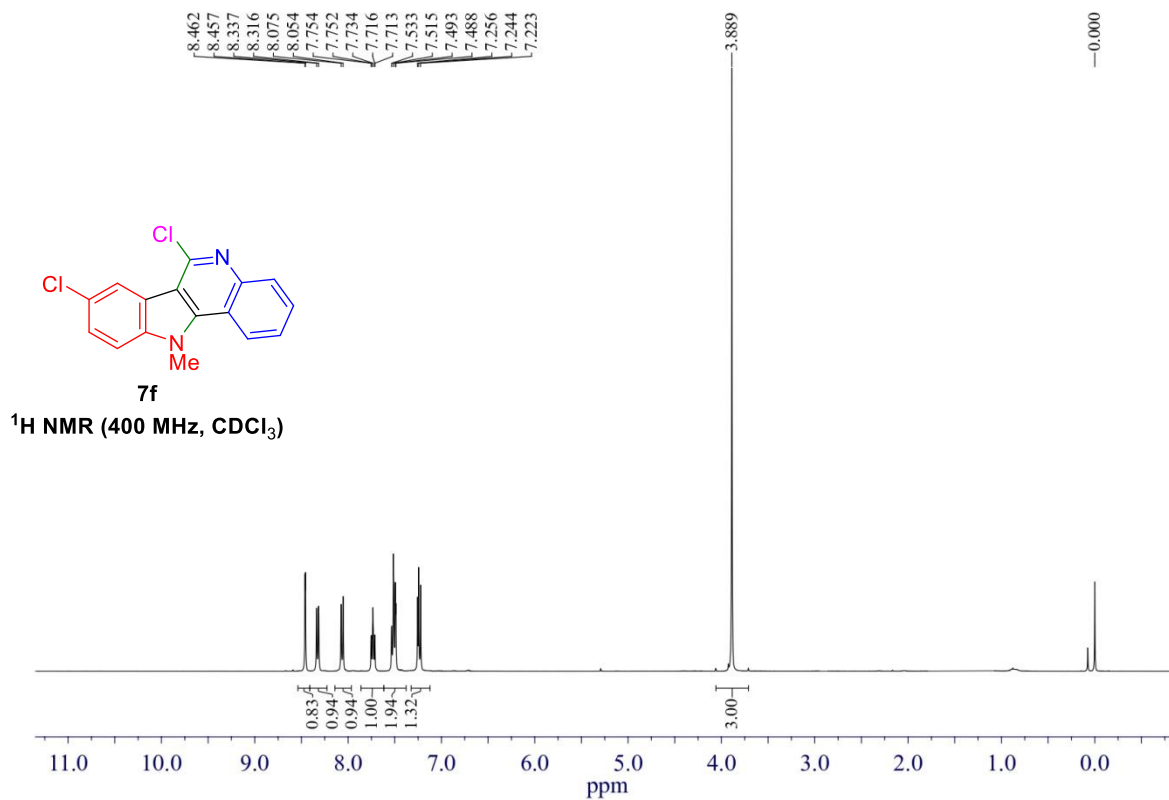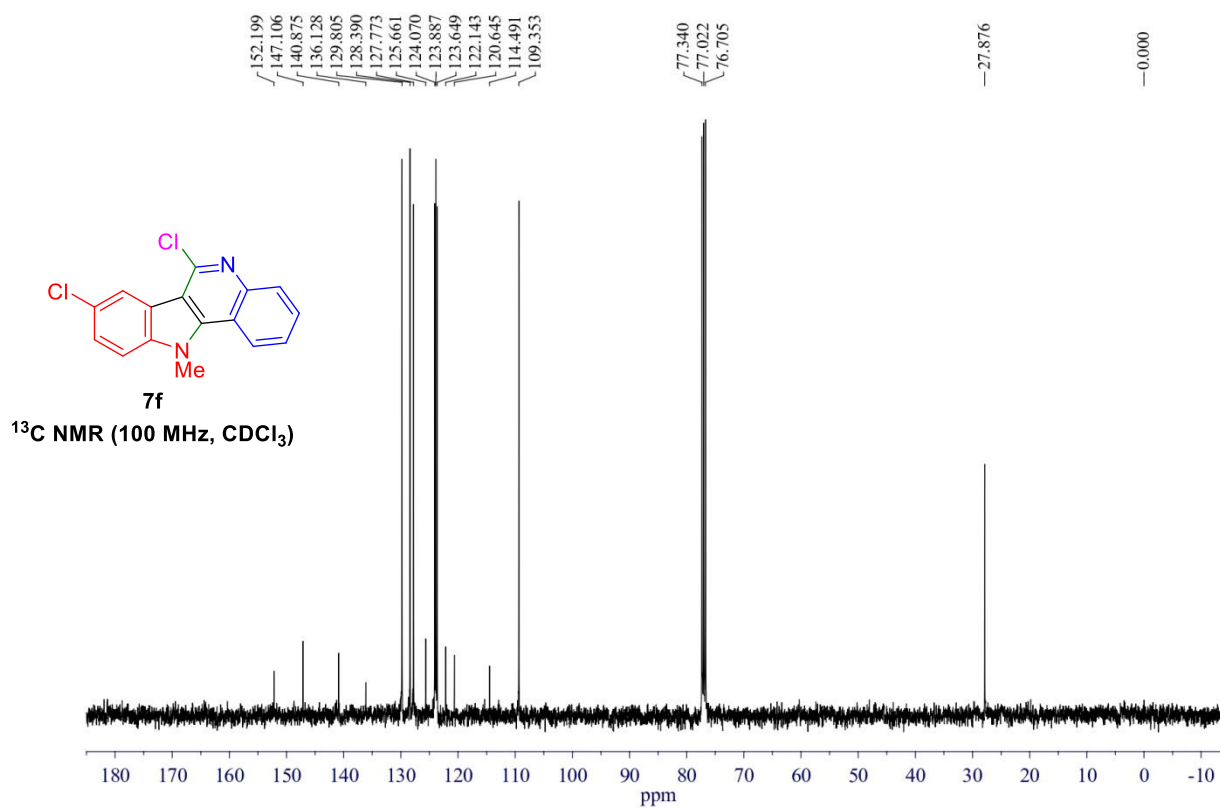



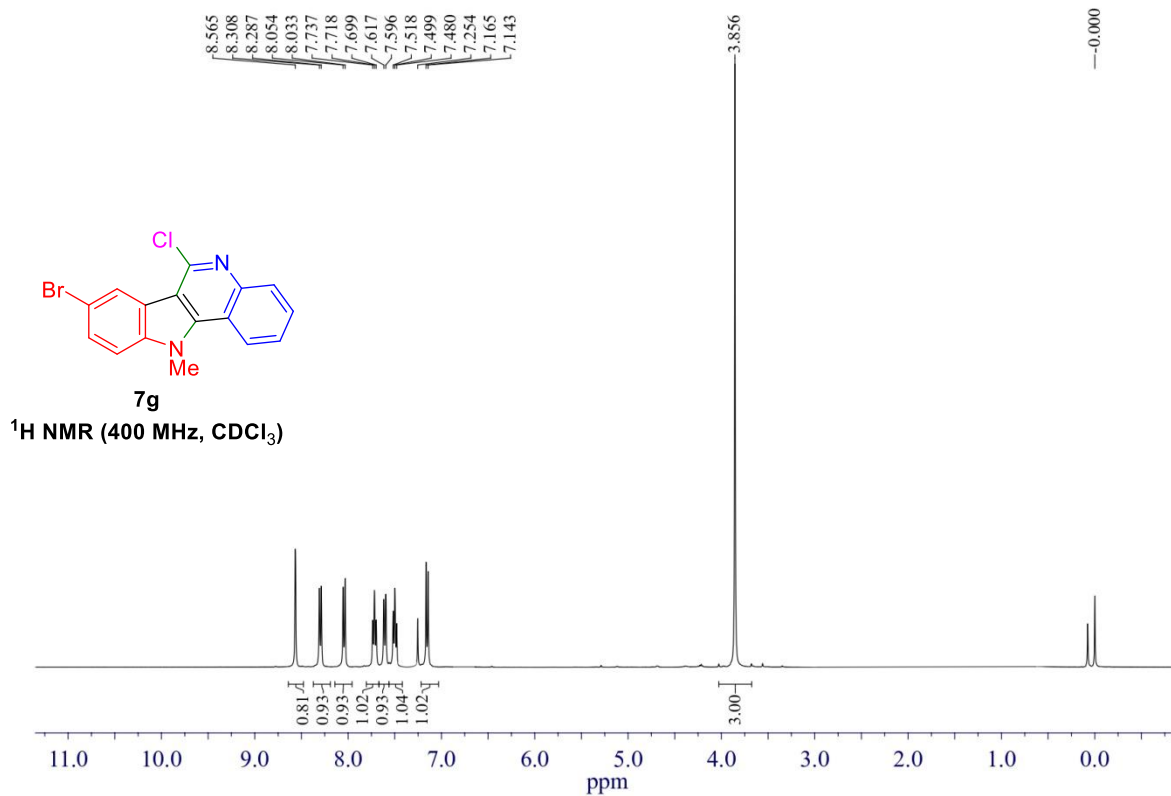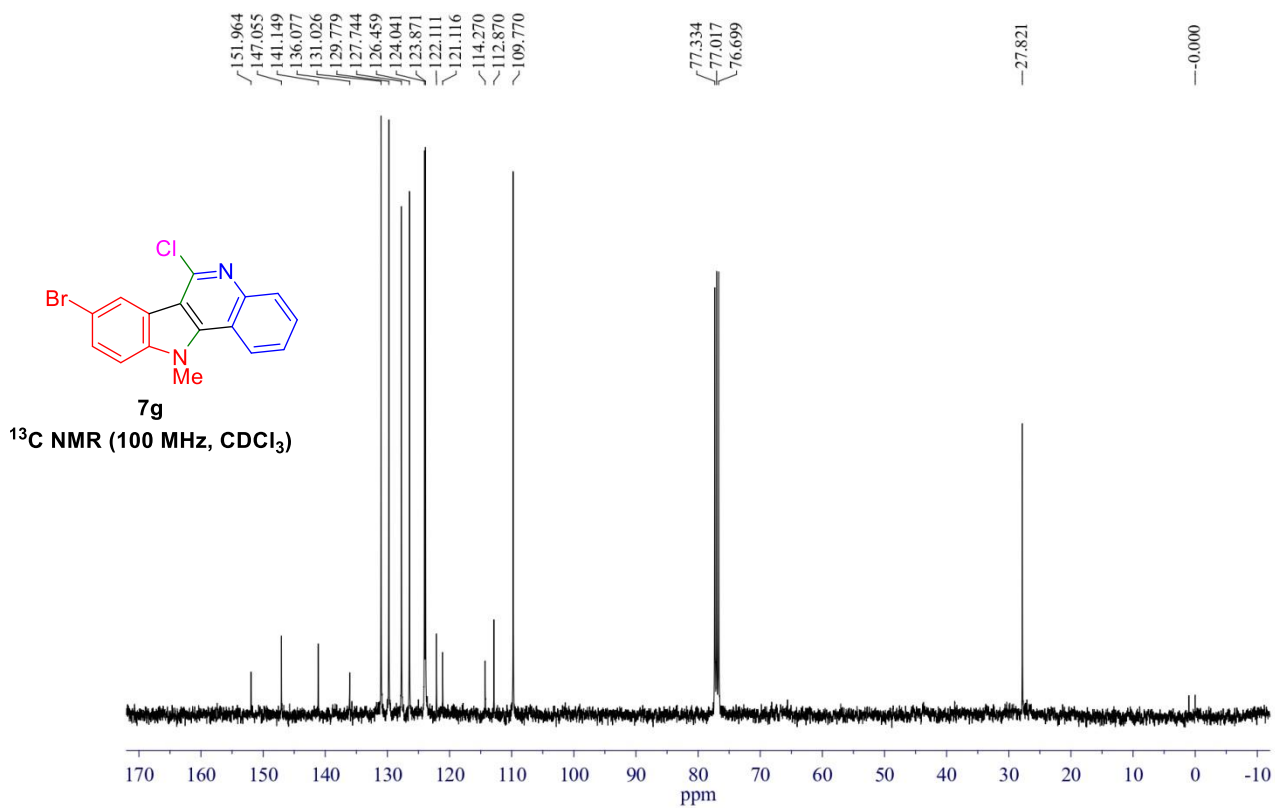

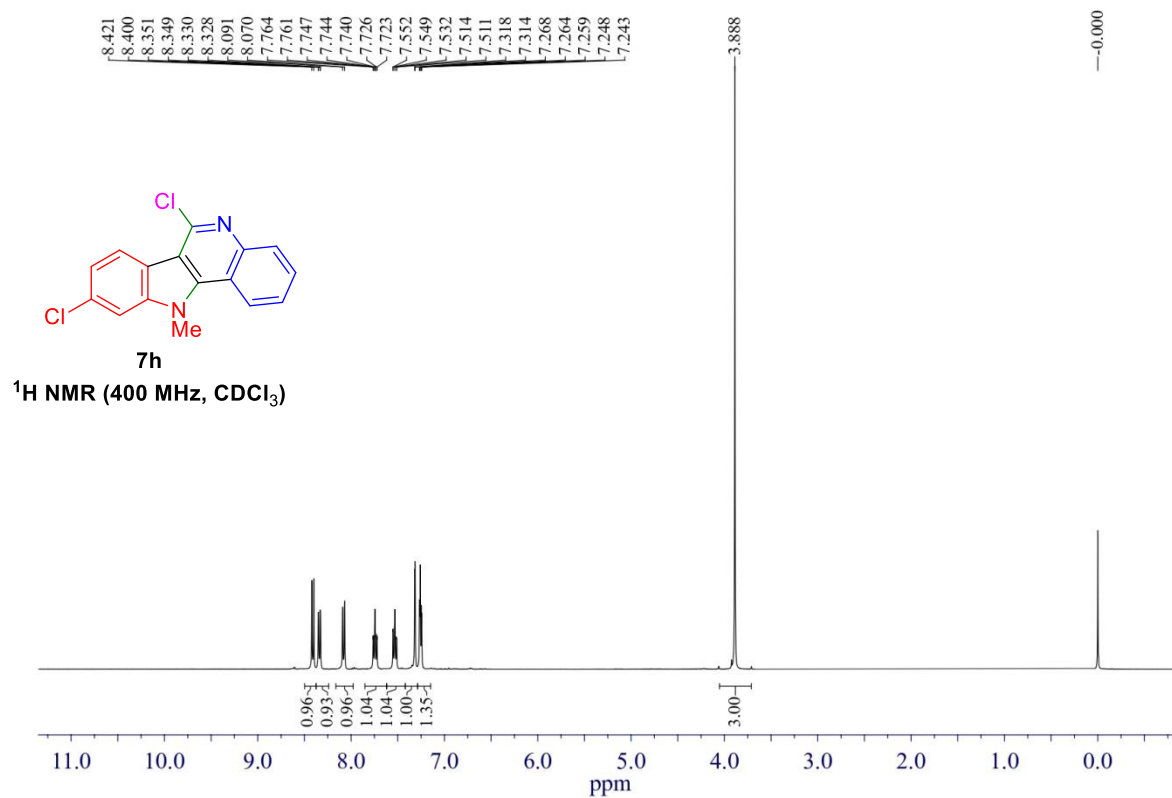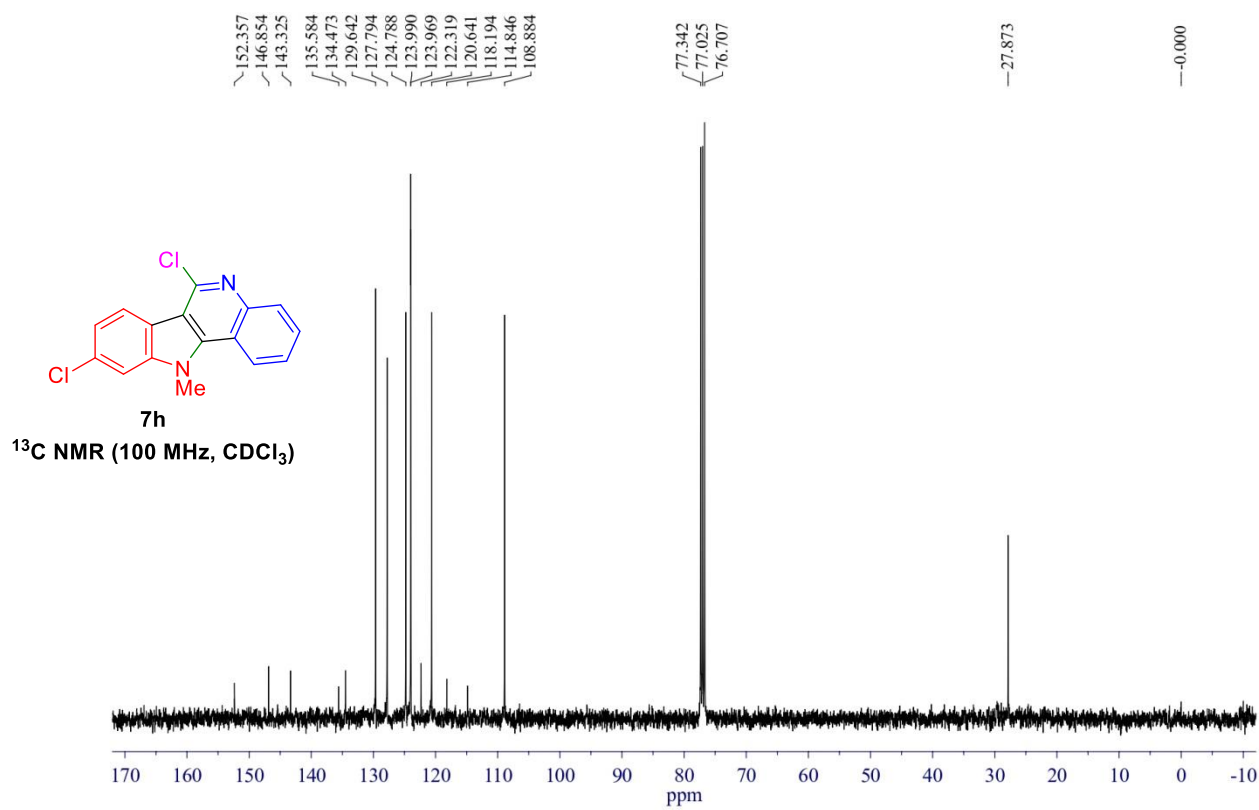

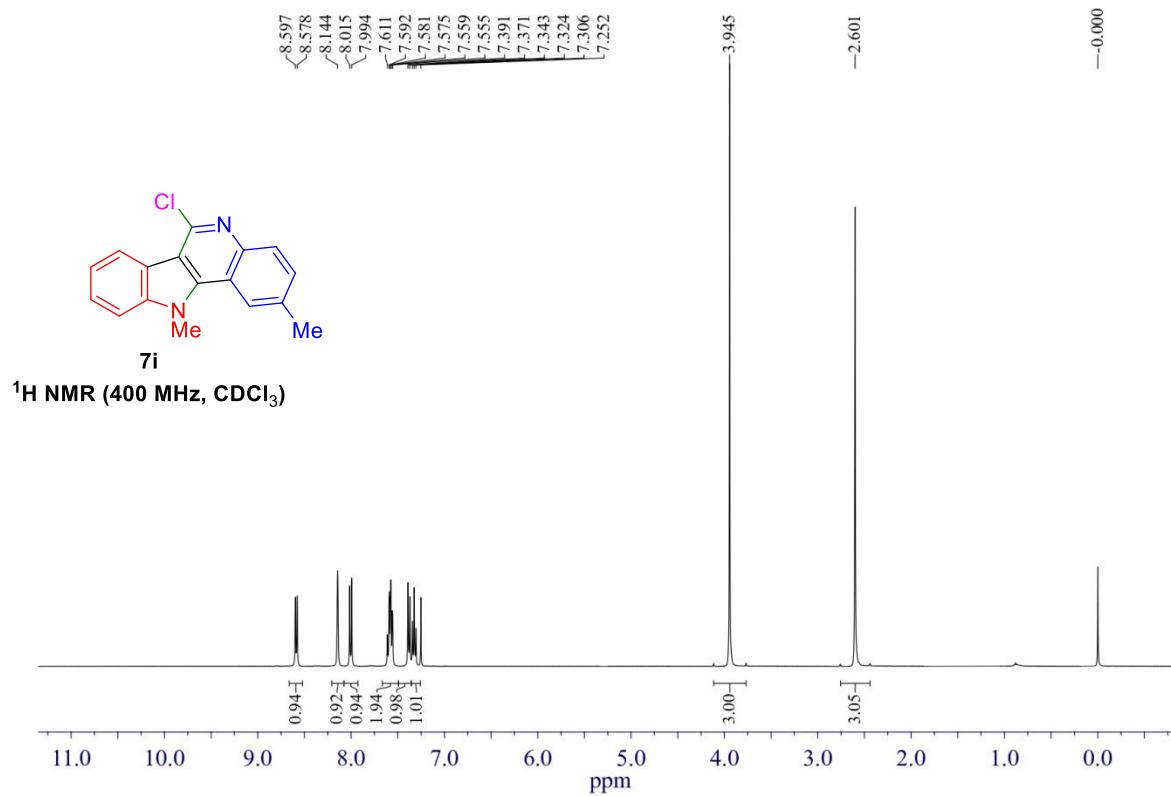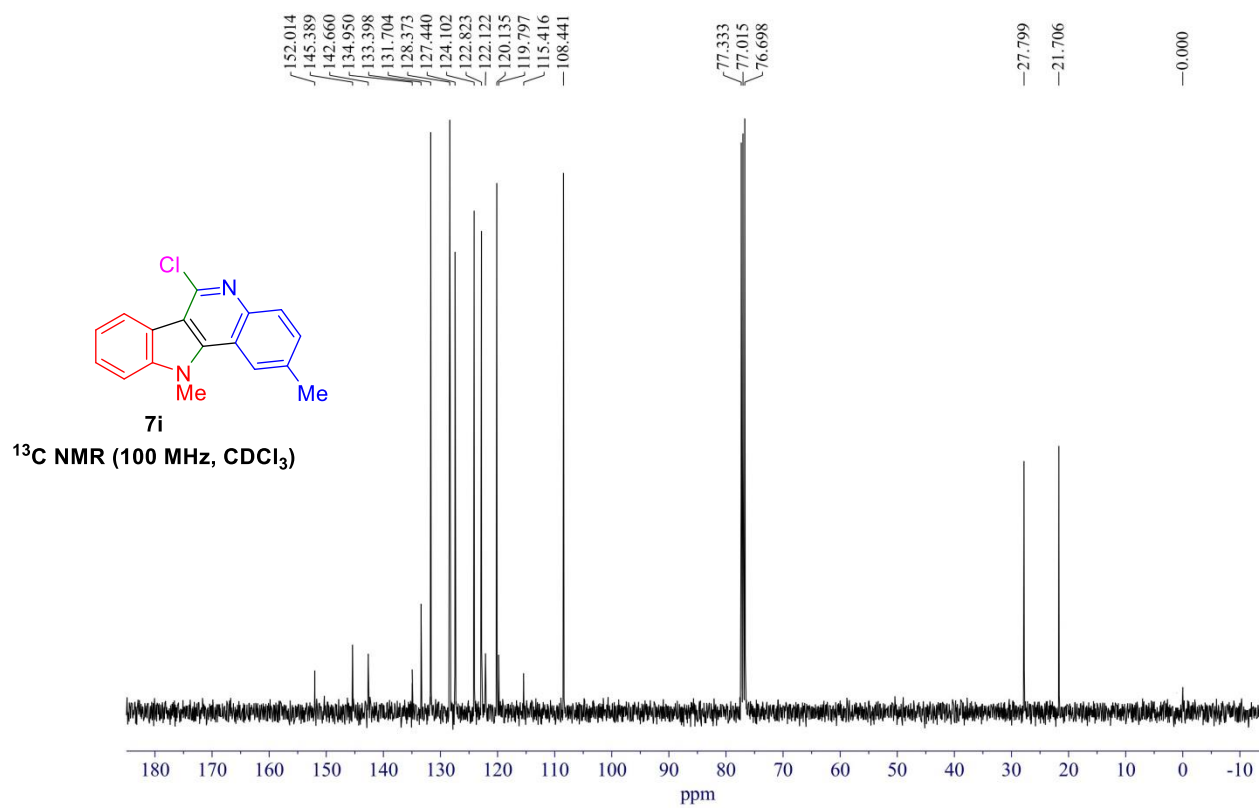

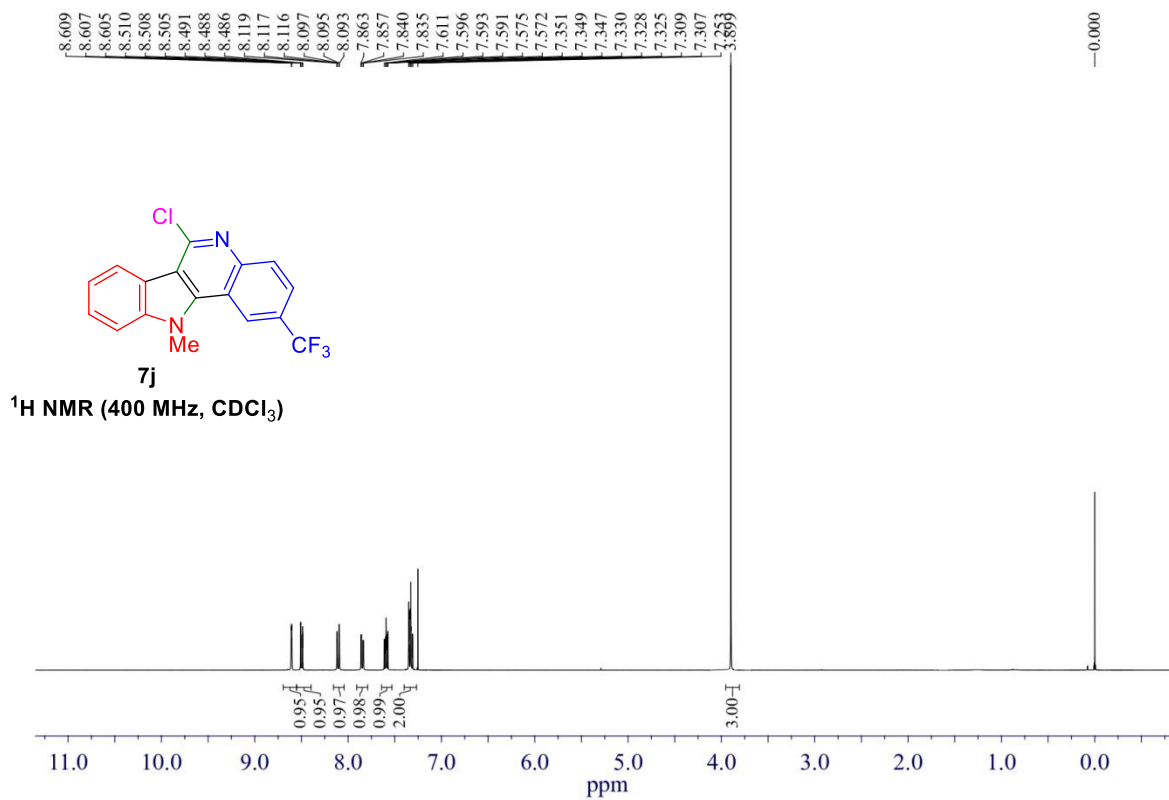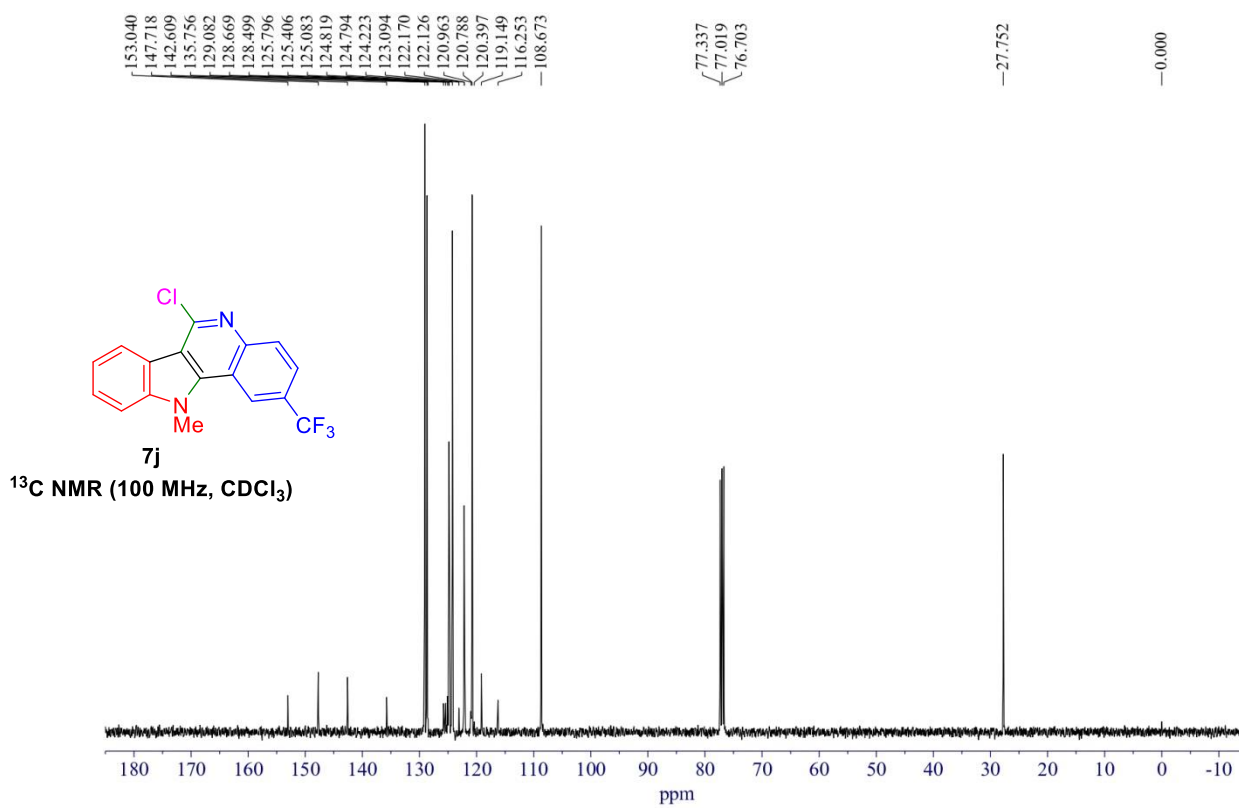

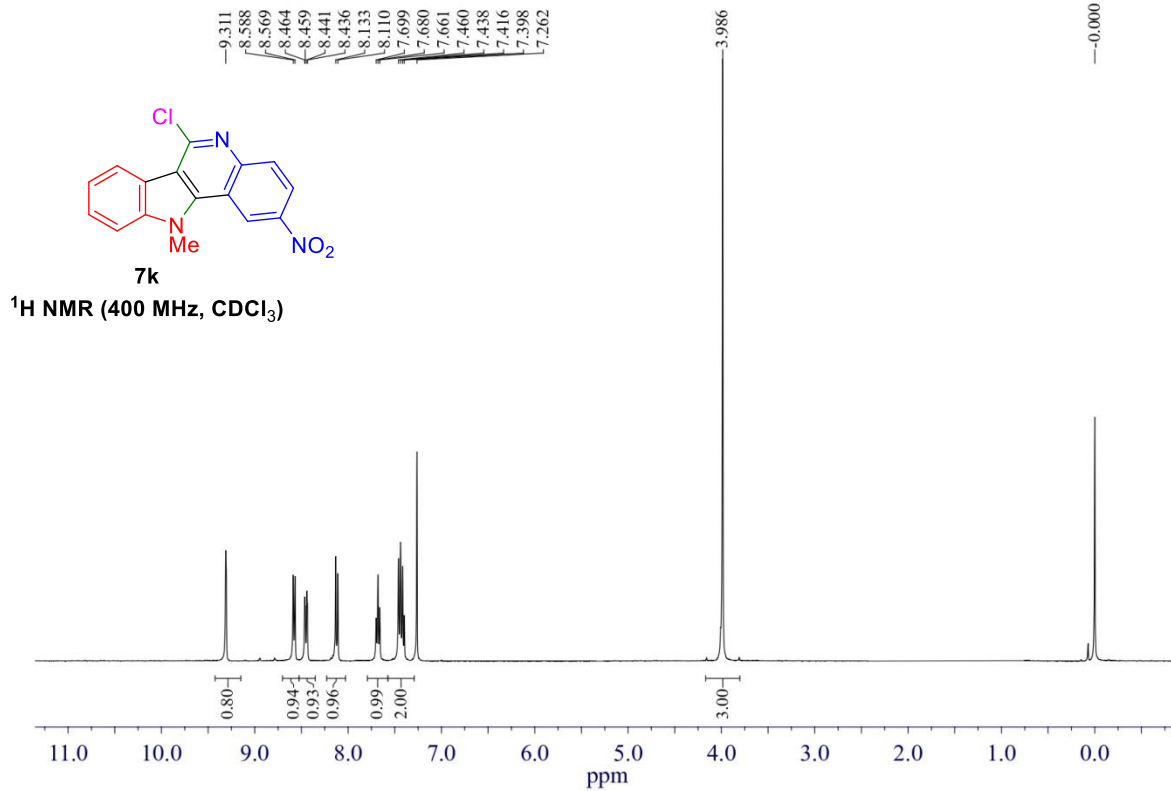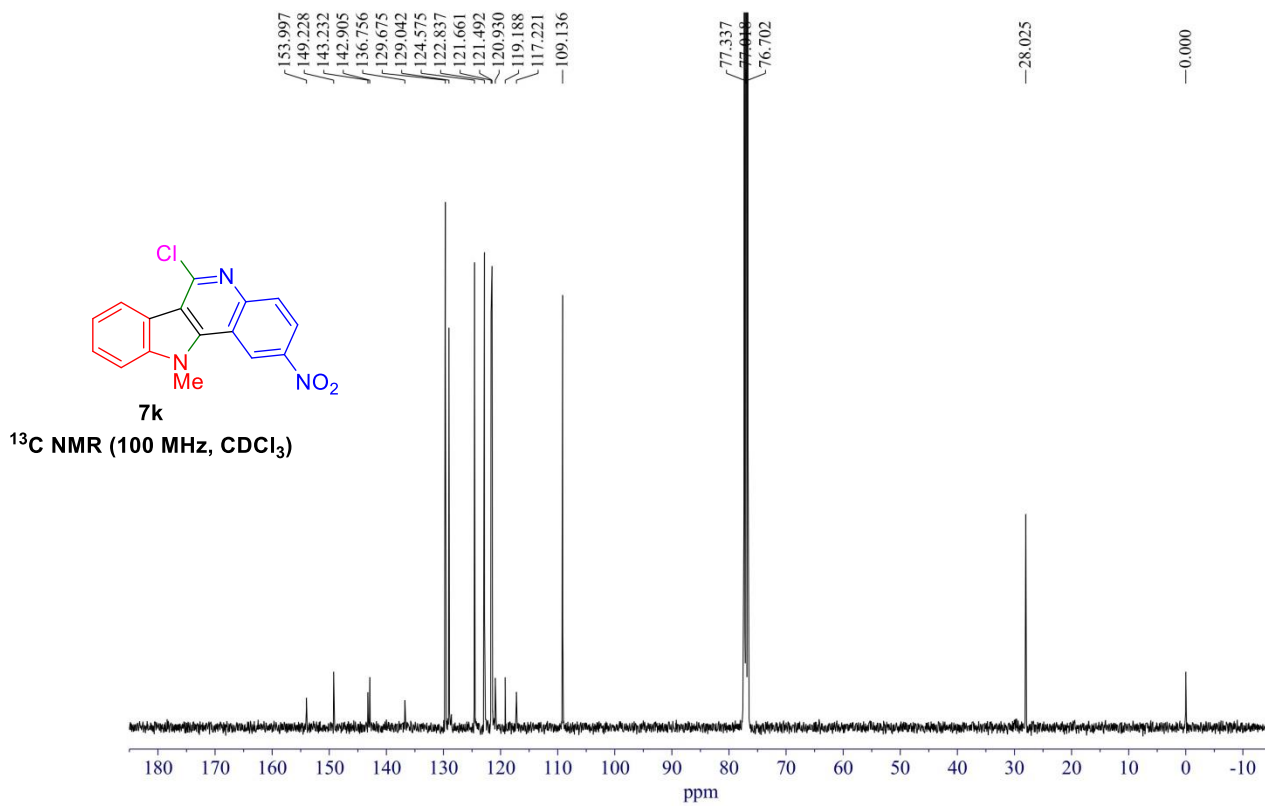

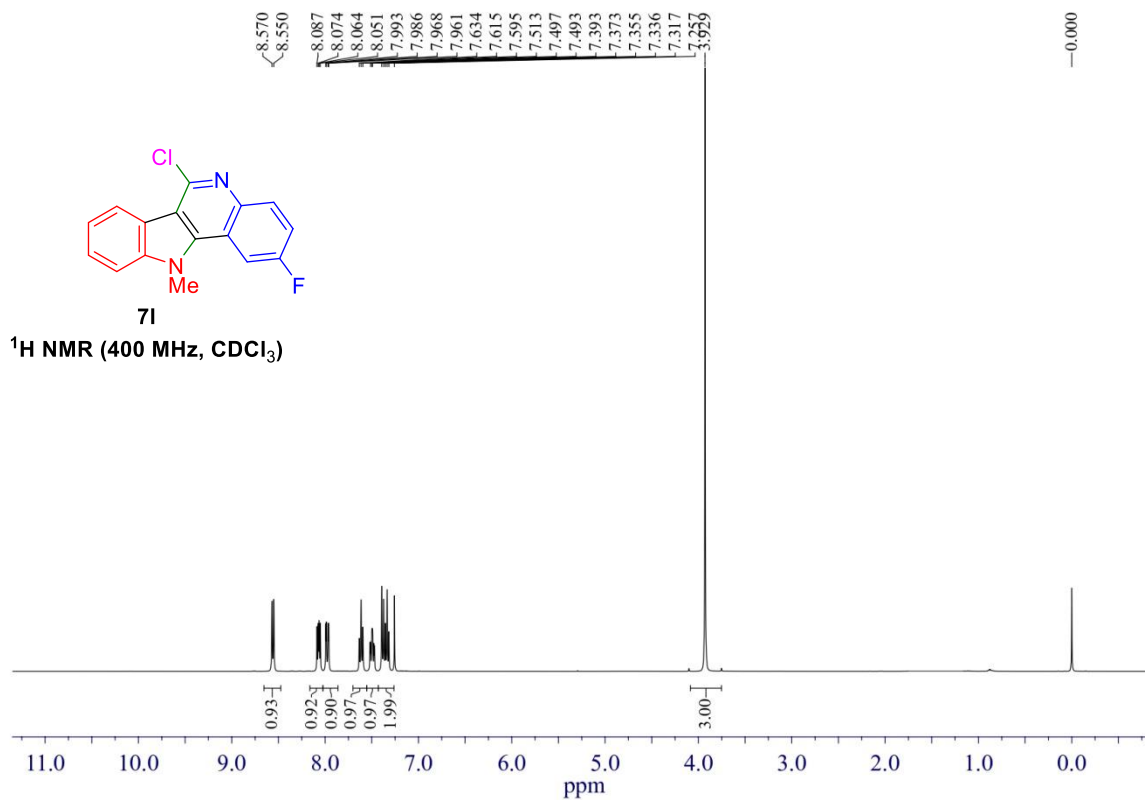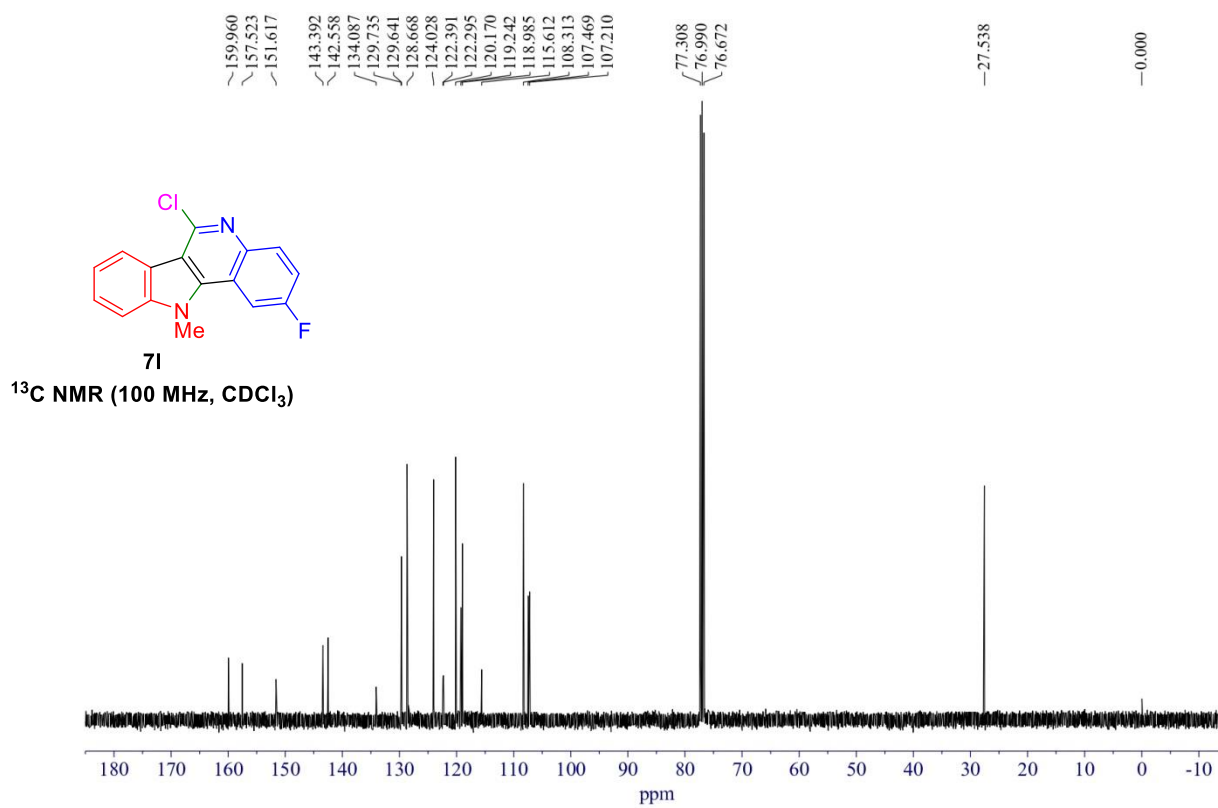

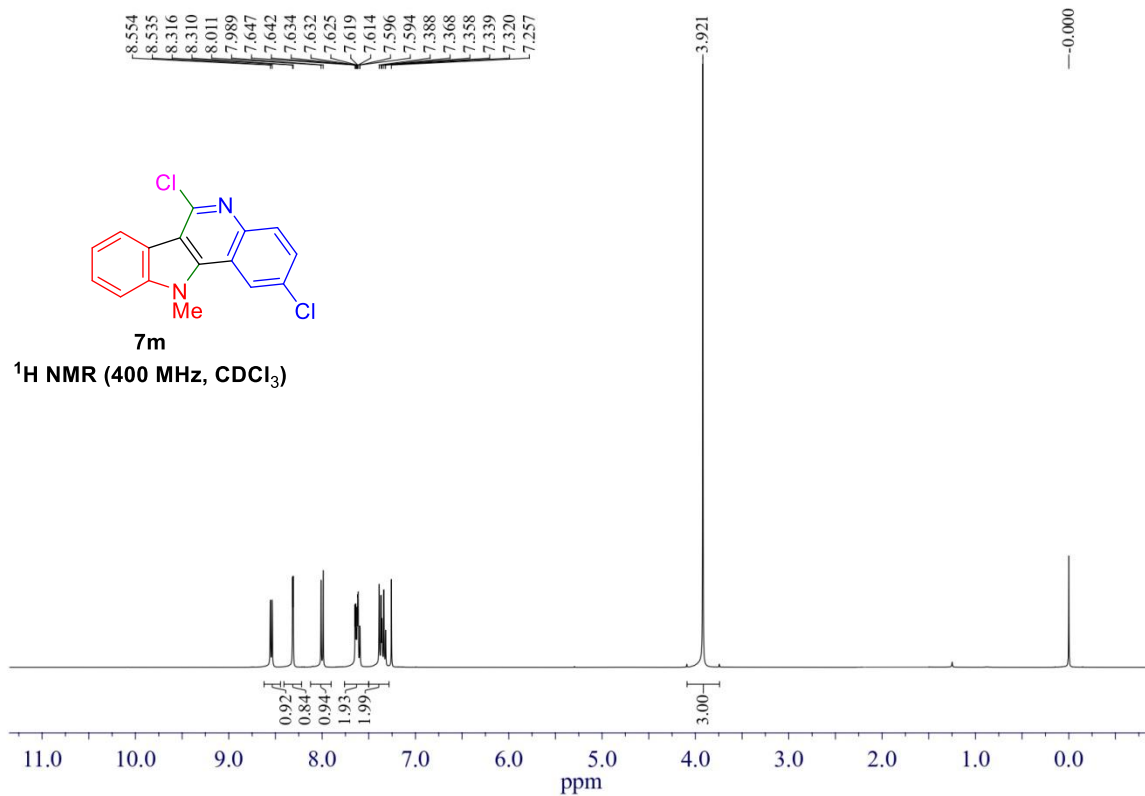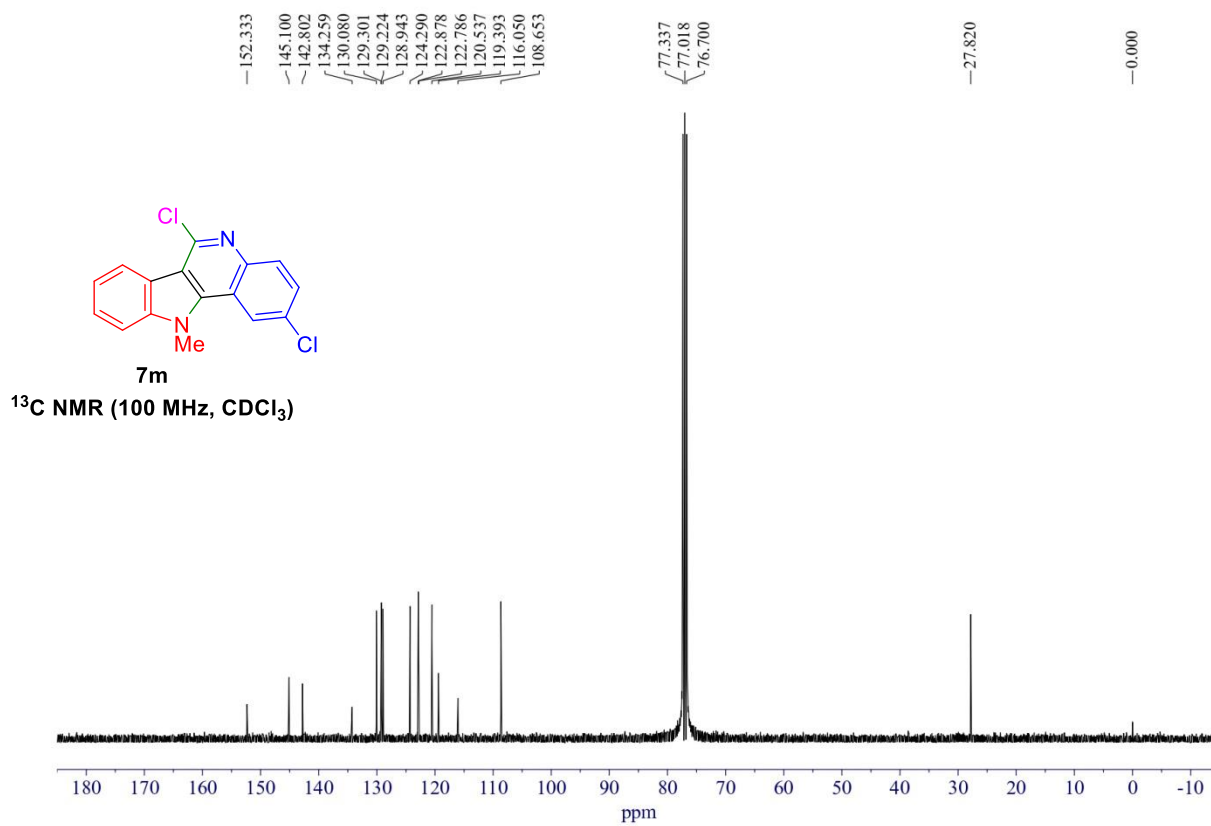

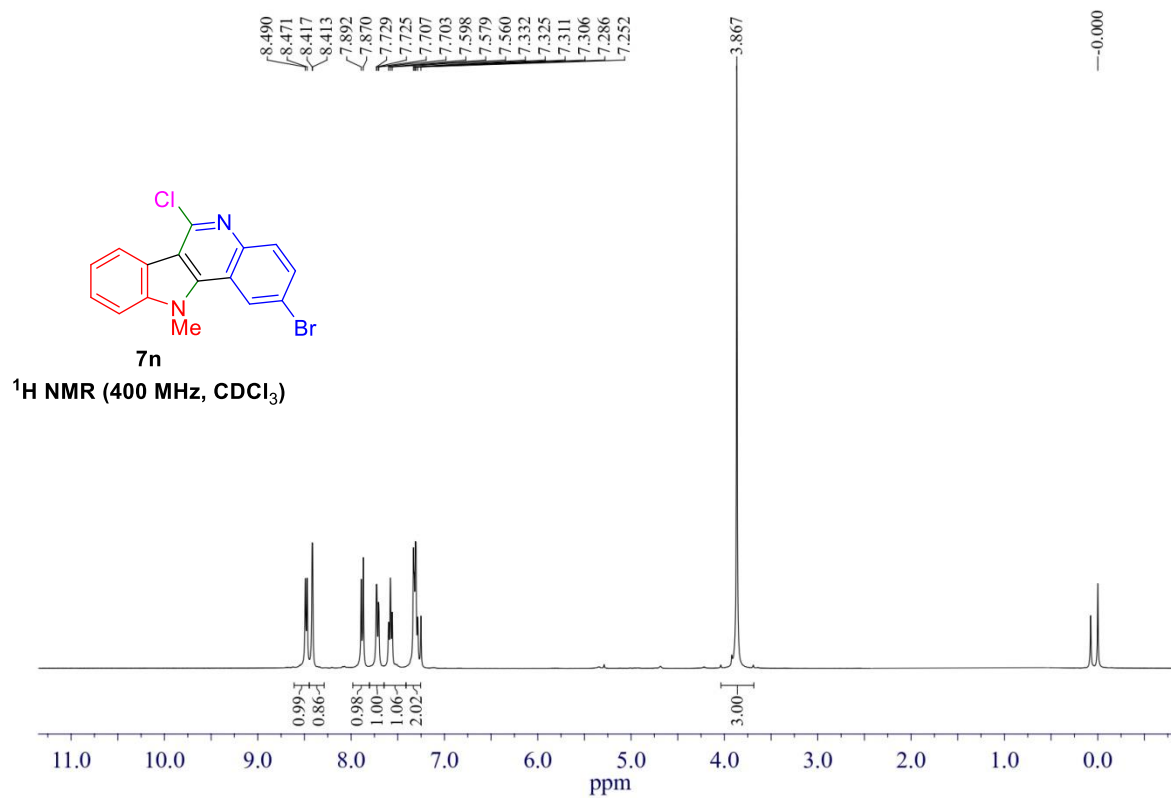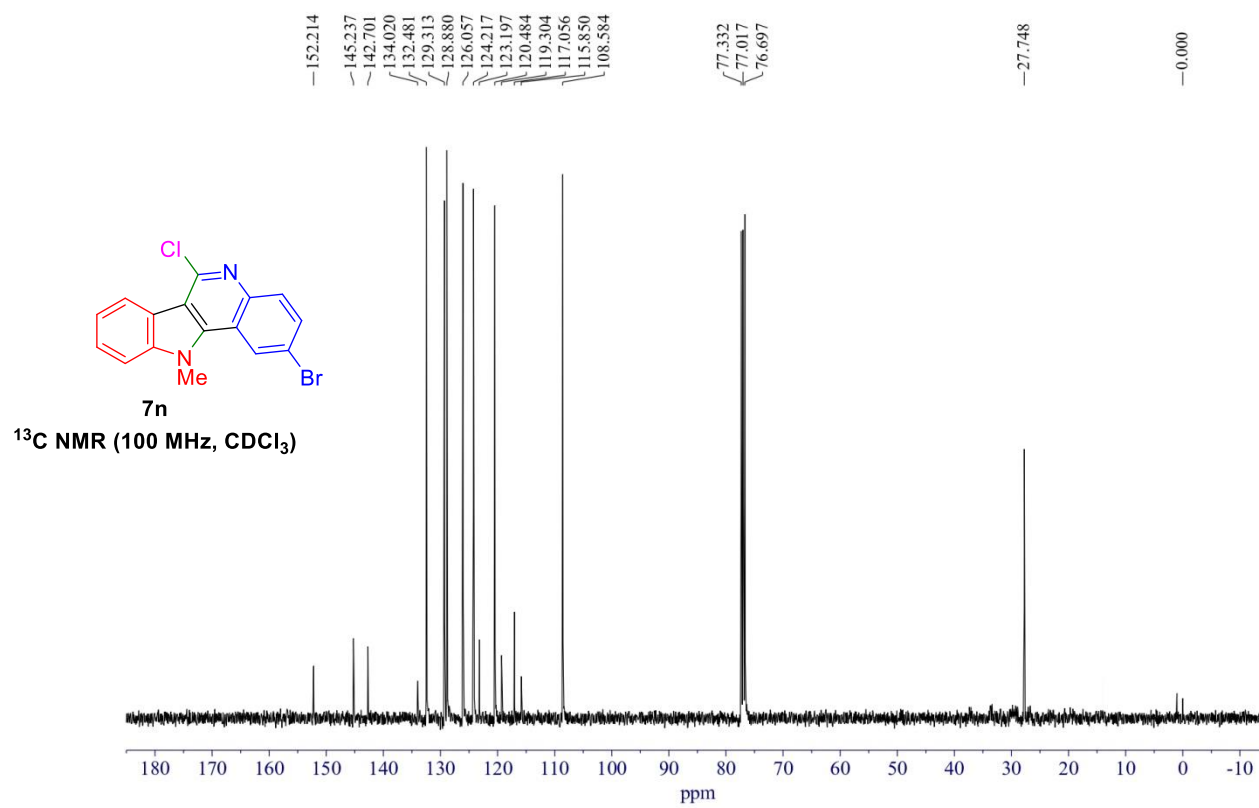



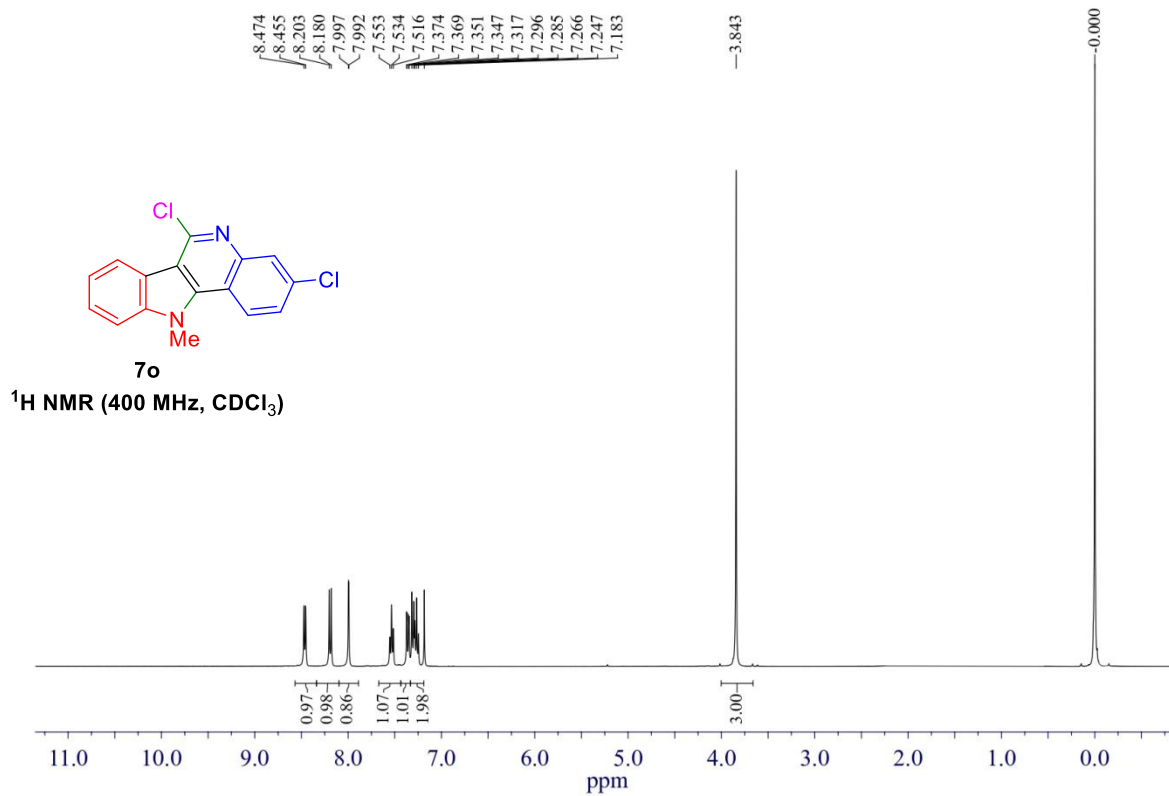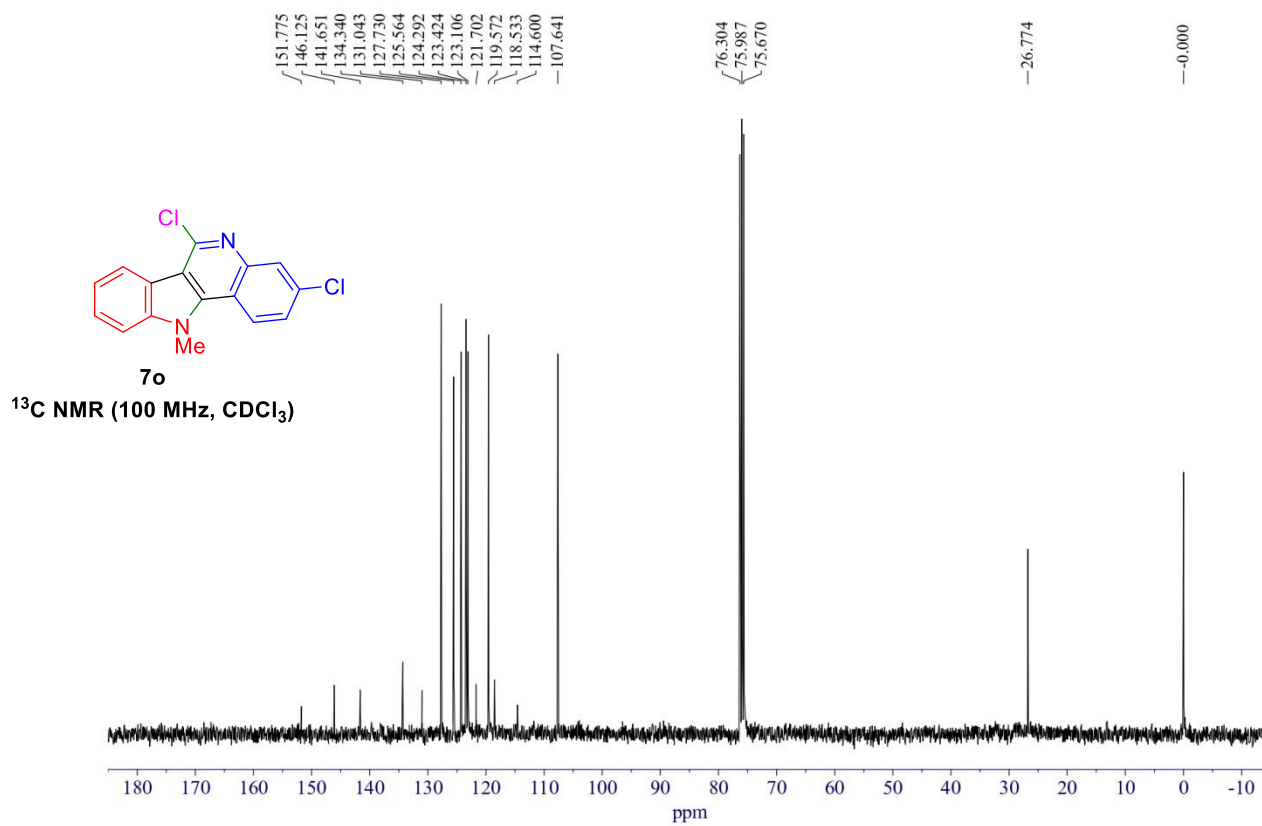

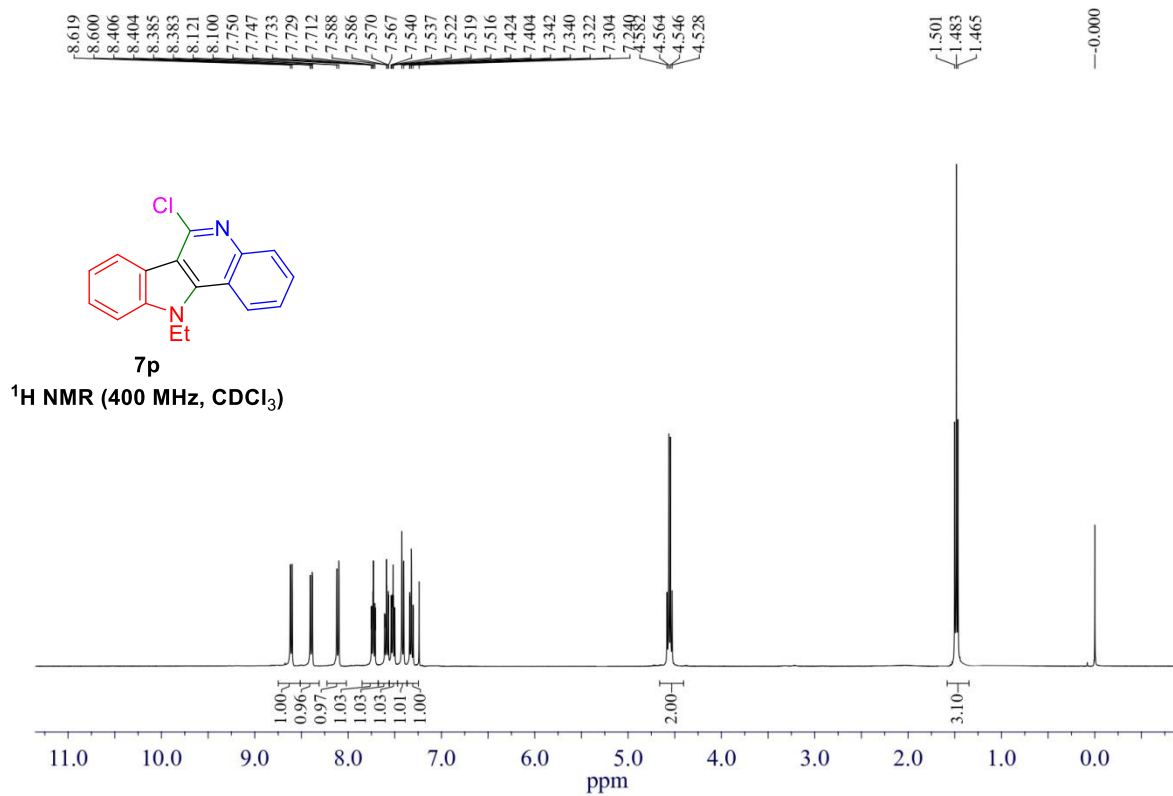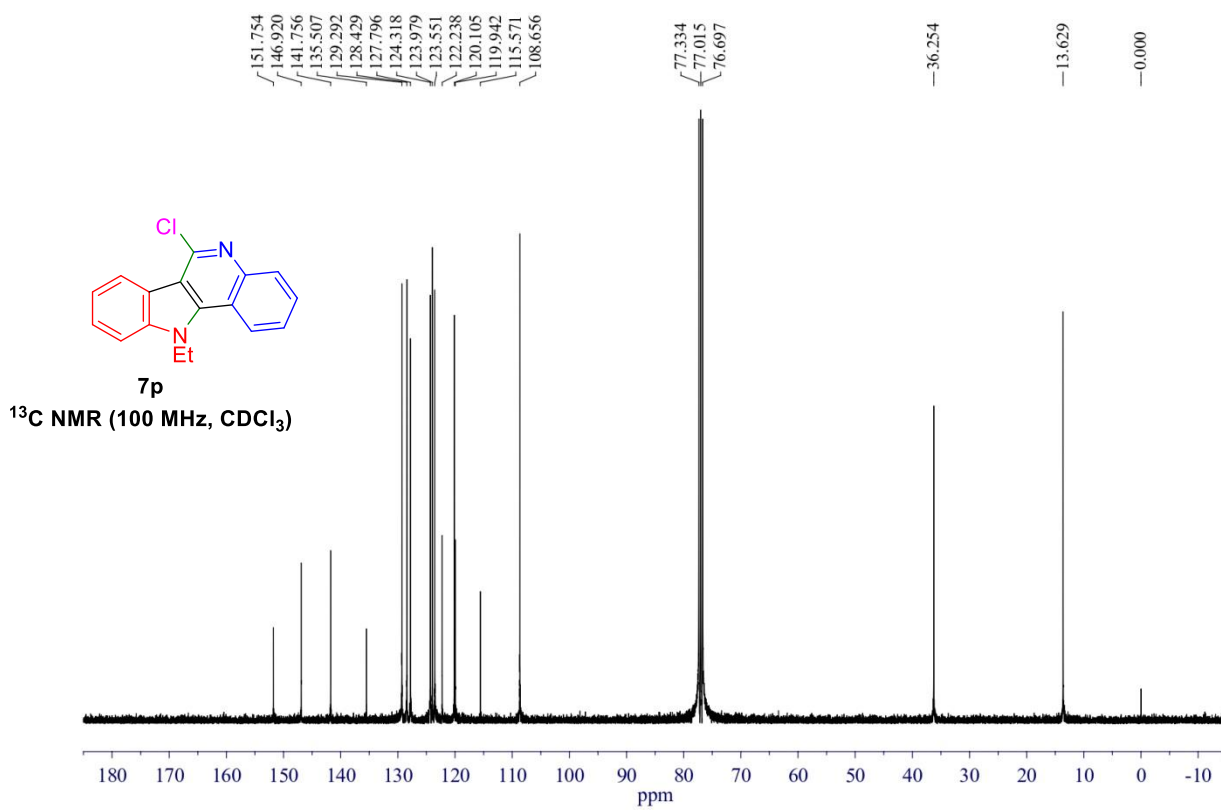

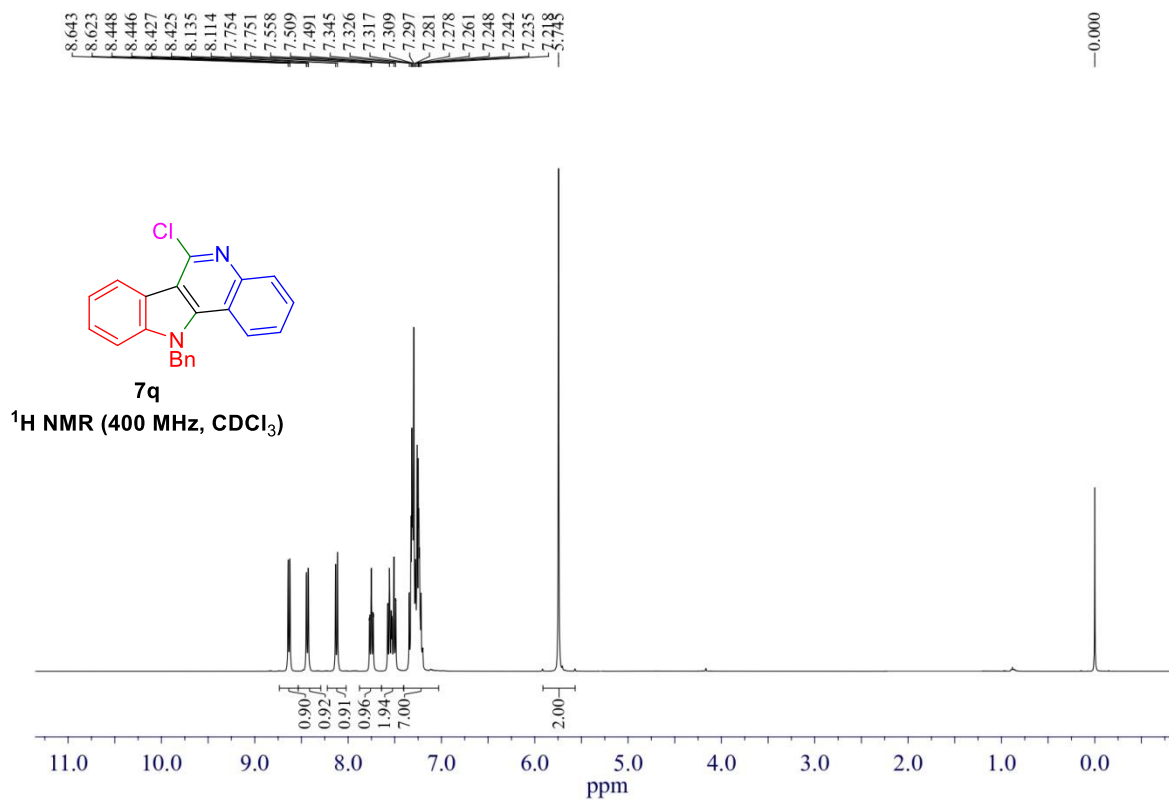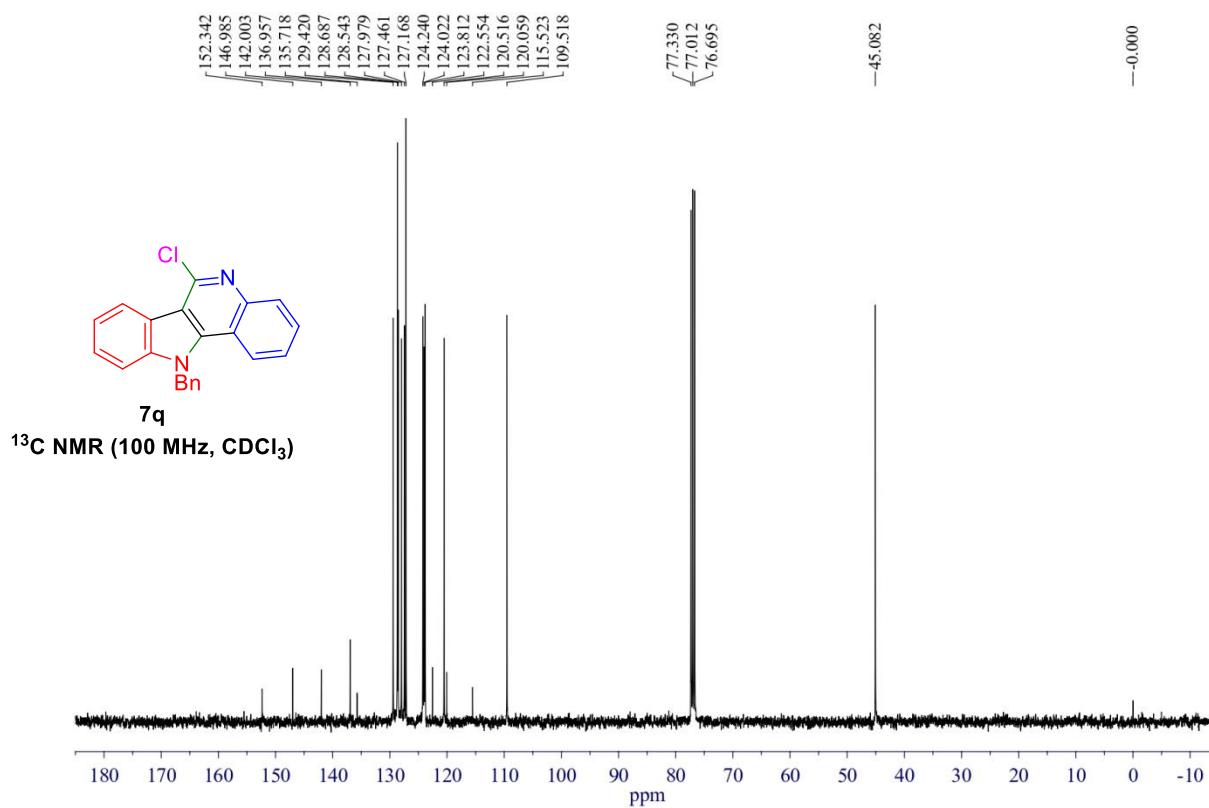

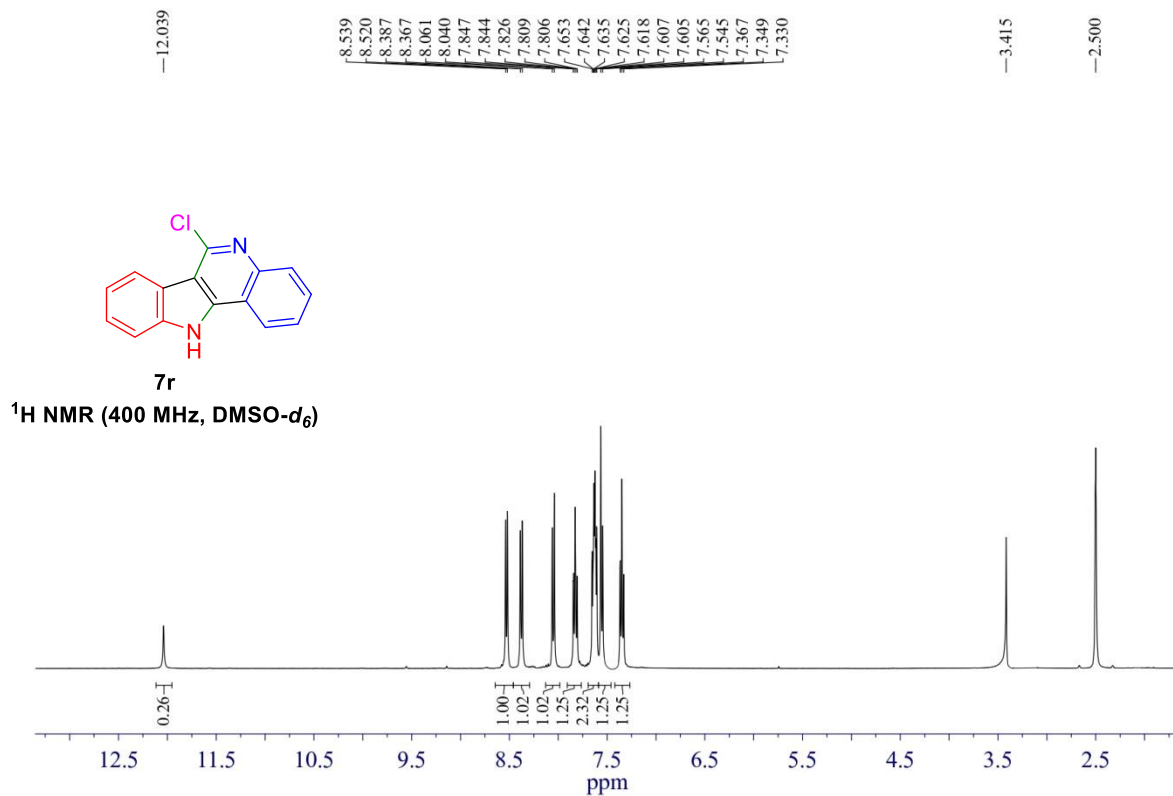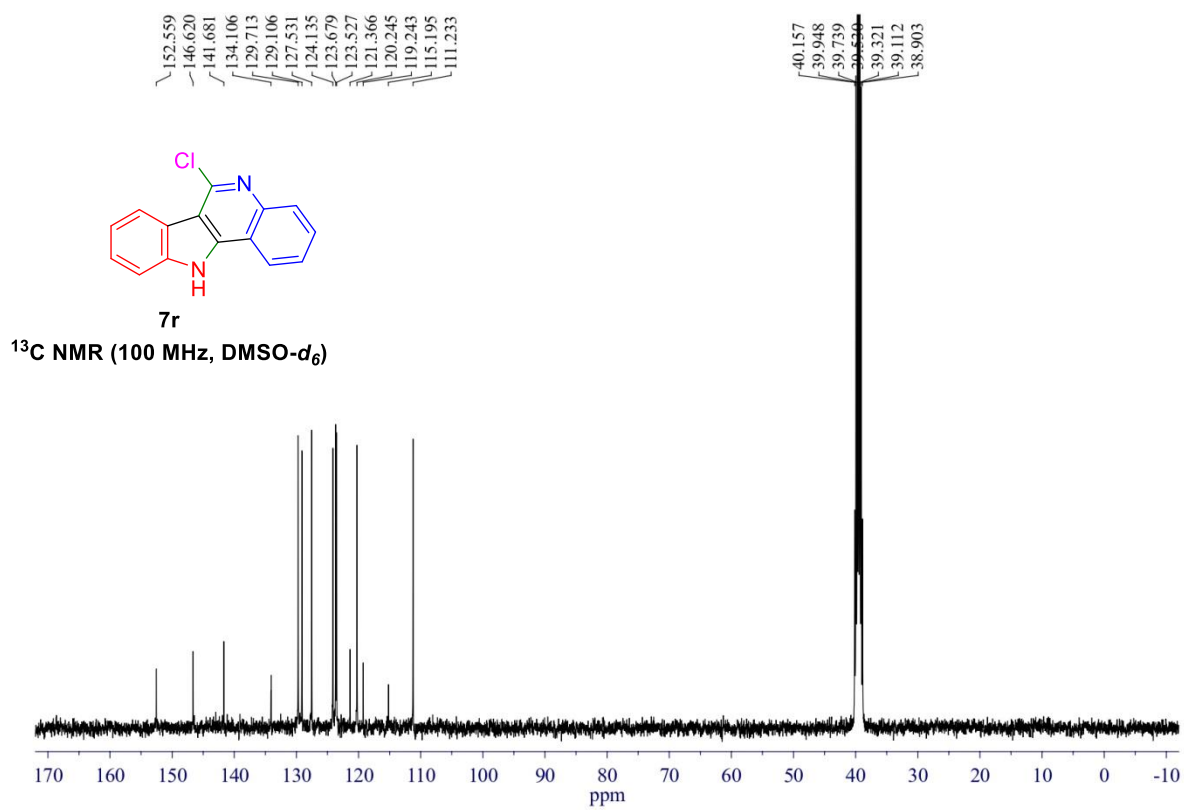

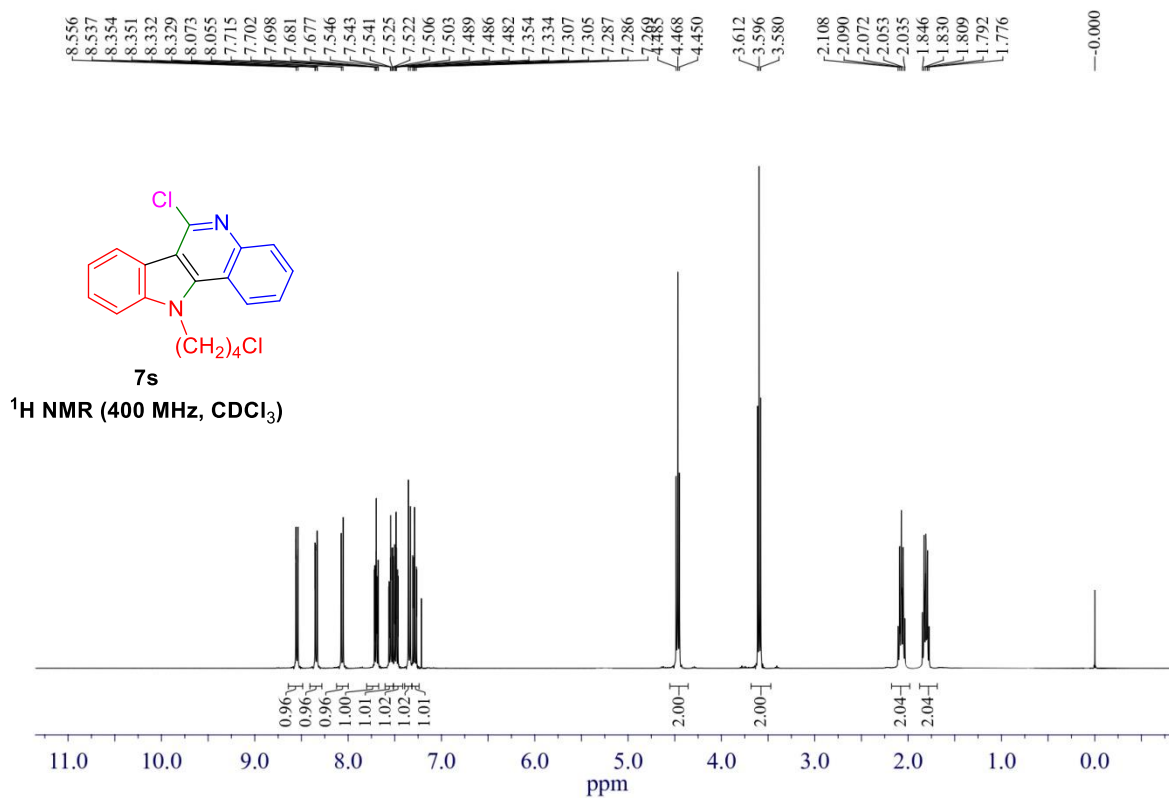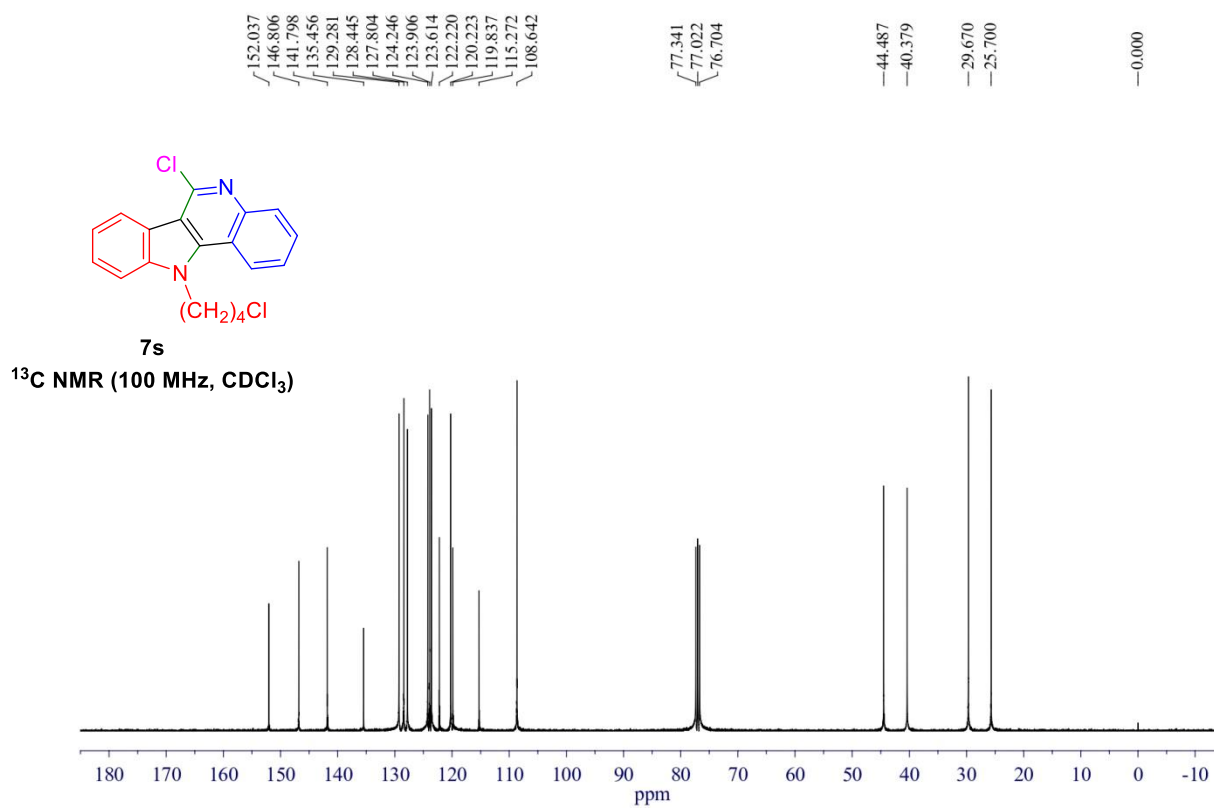

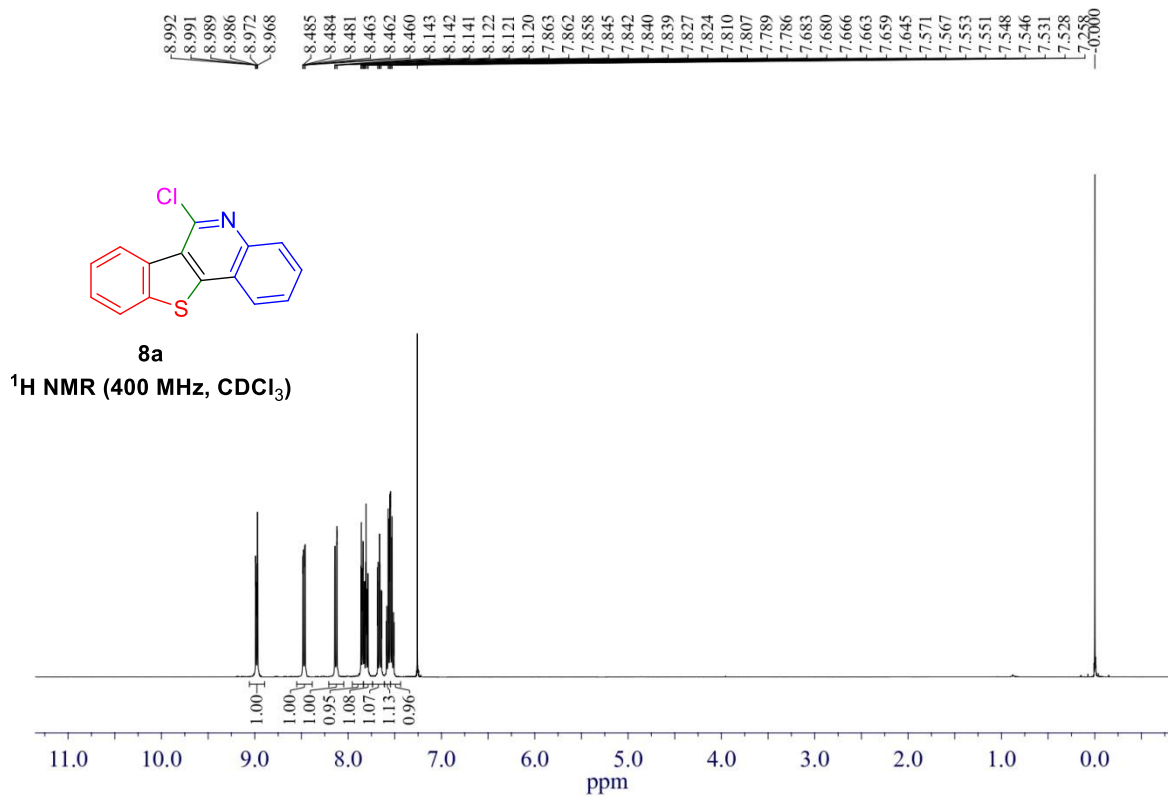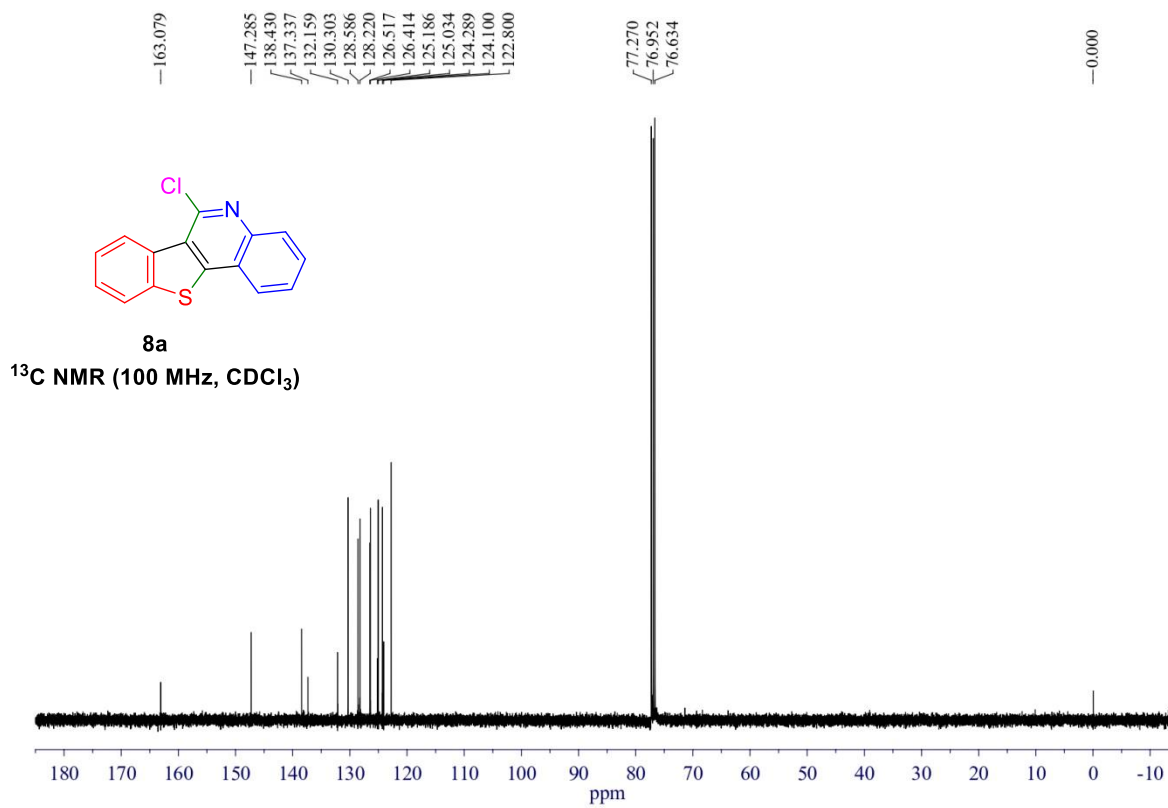

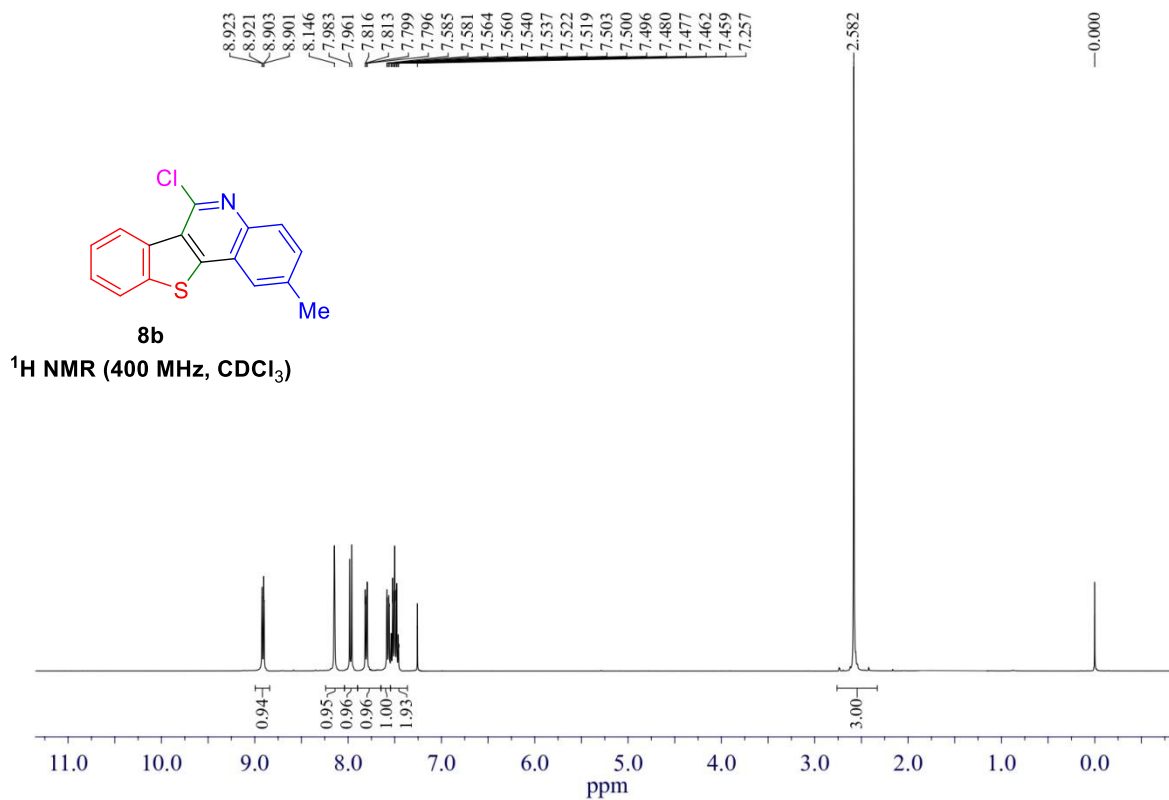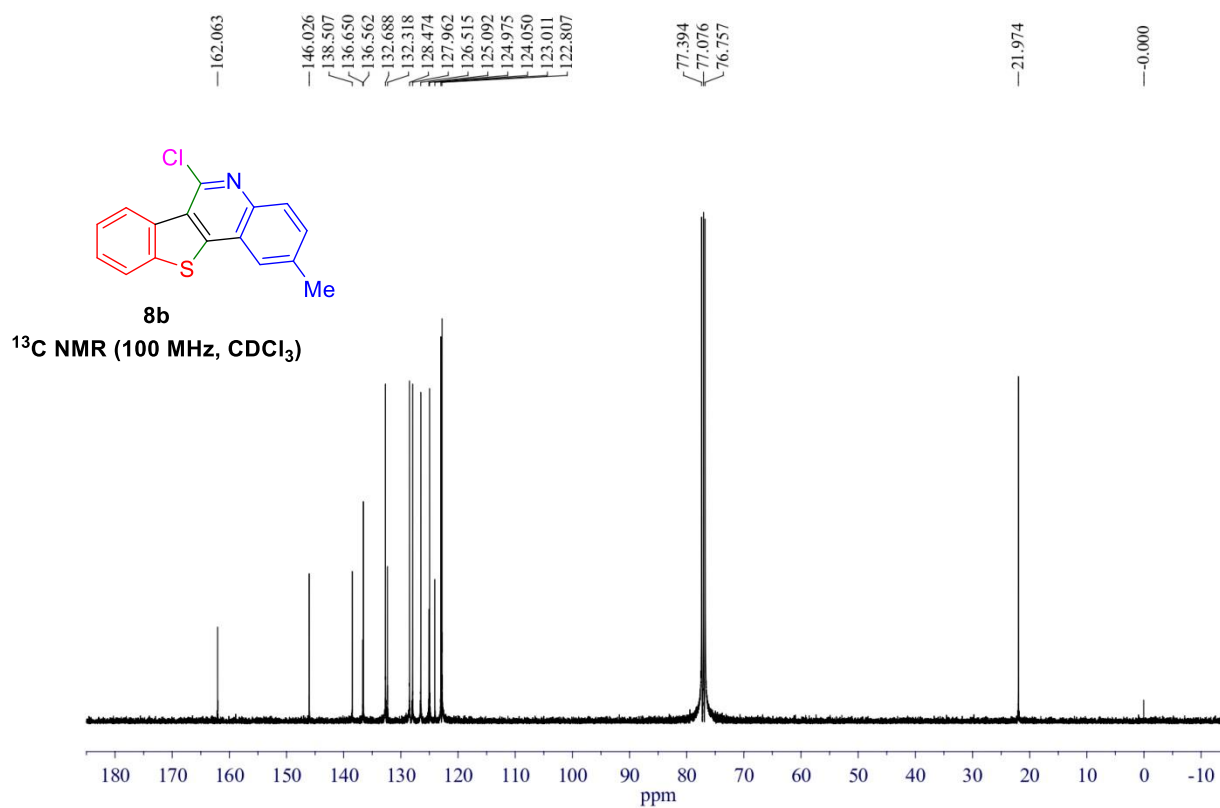

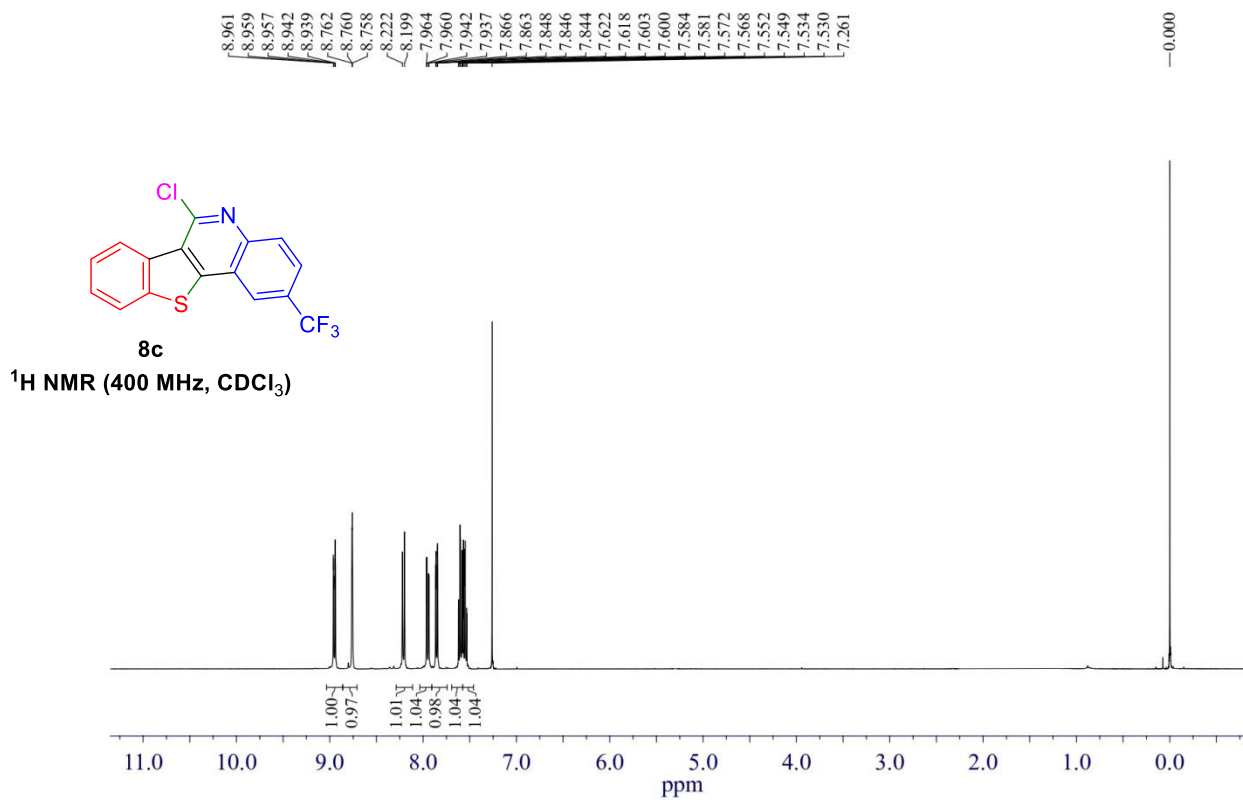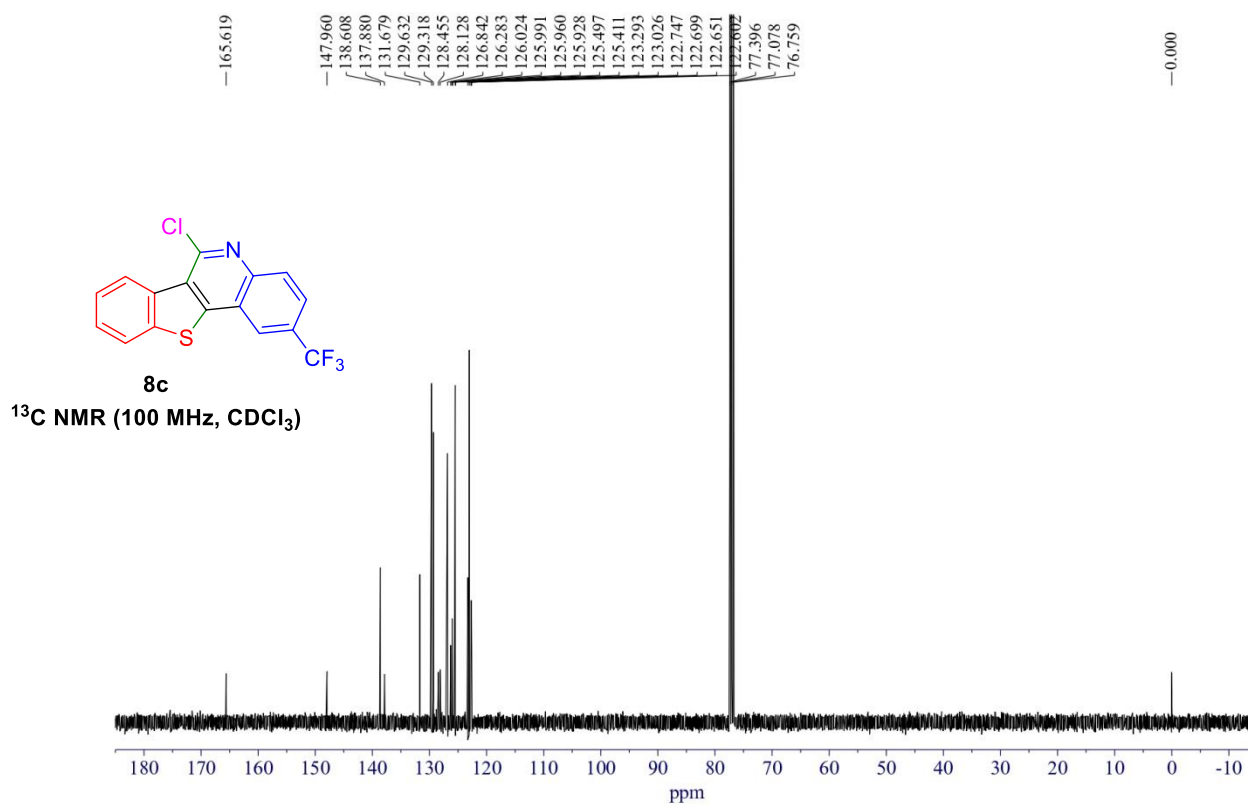



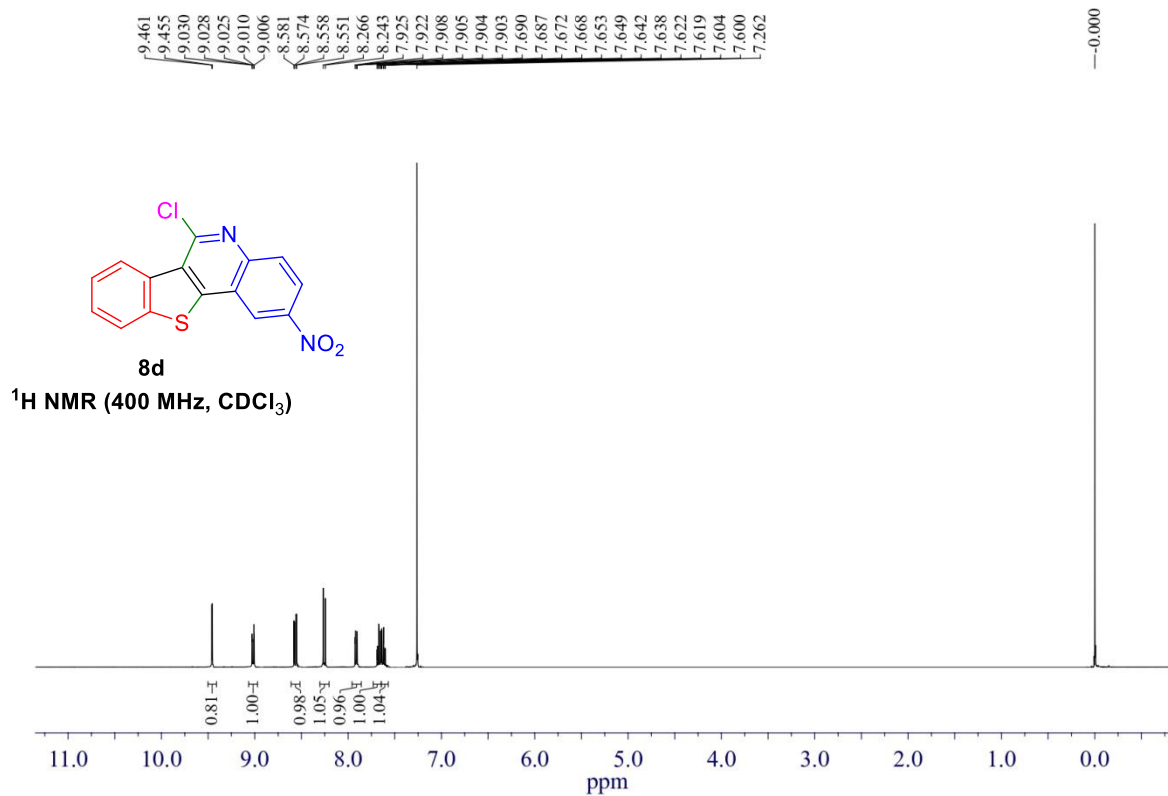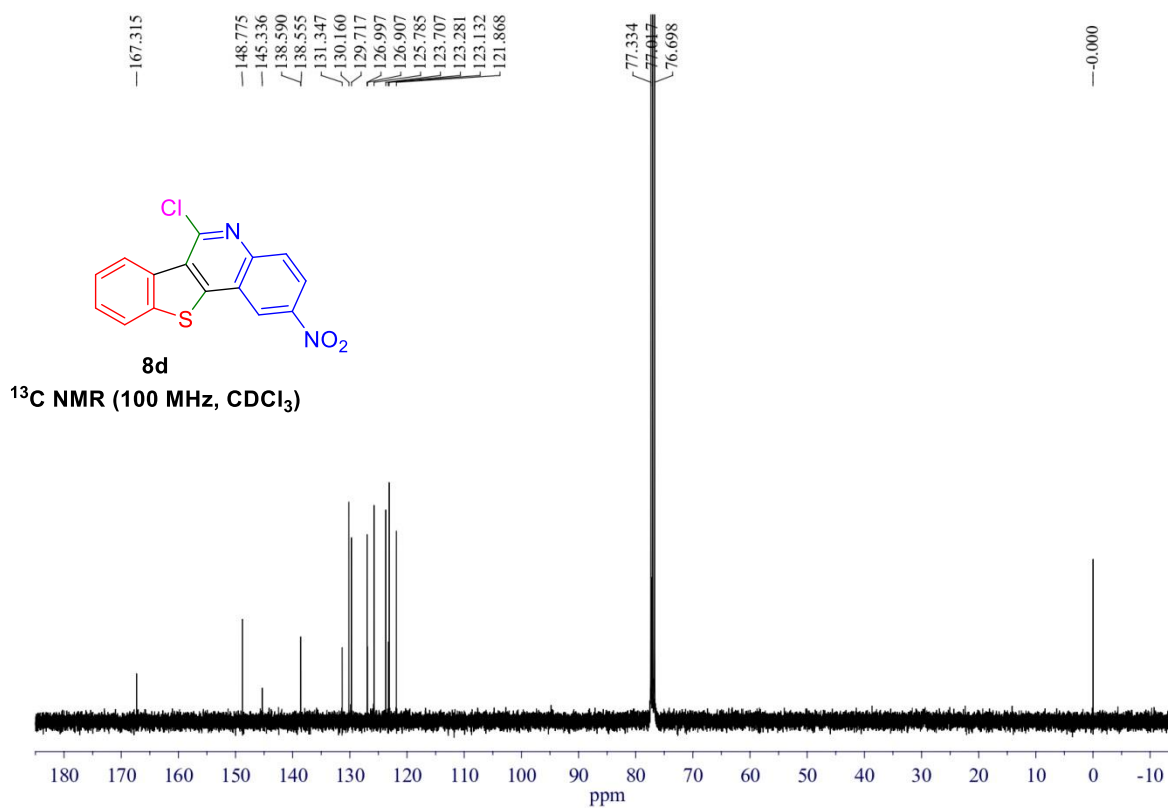

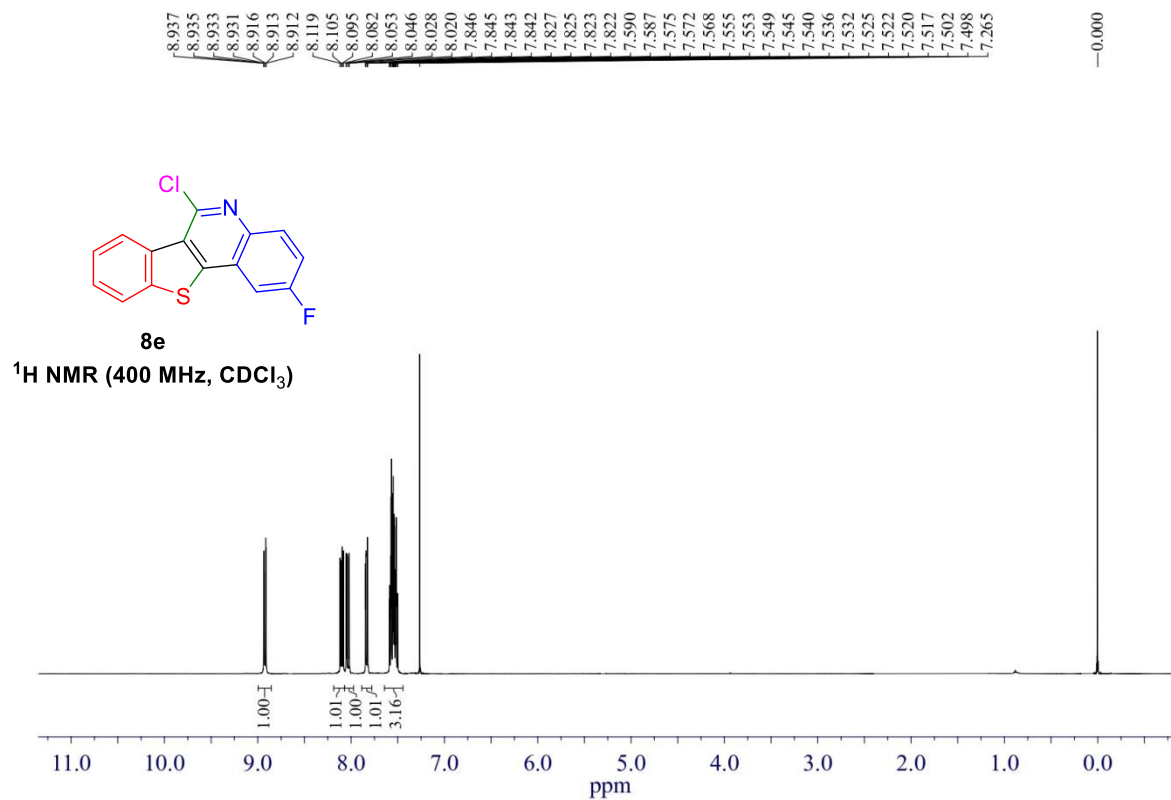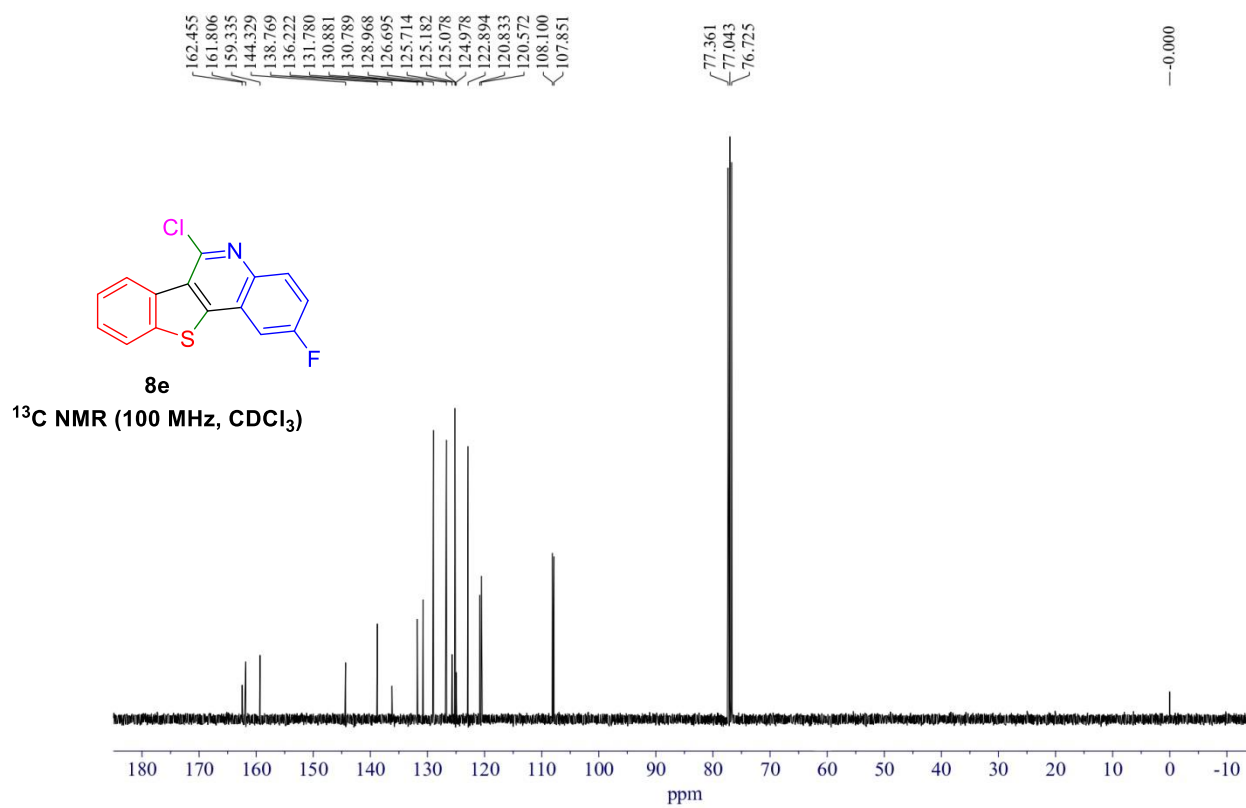

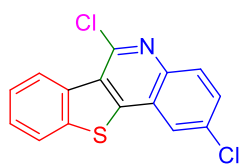

**8f**

$^1\text{H NMR}$  (400 MHz,  $\text{CDCl}_3$ )

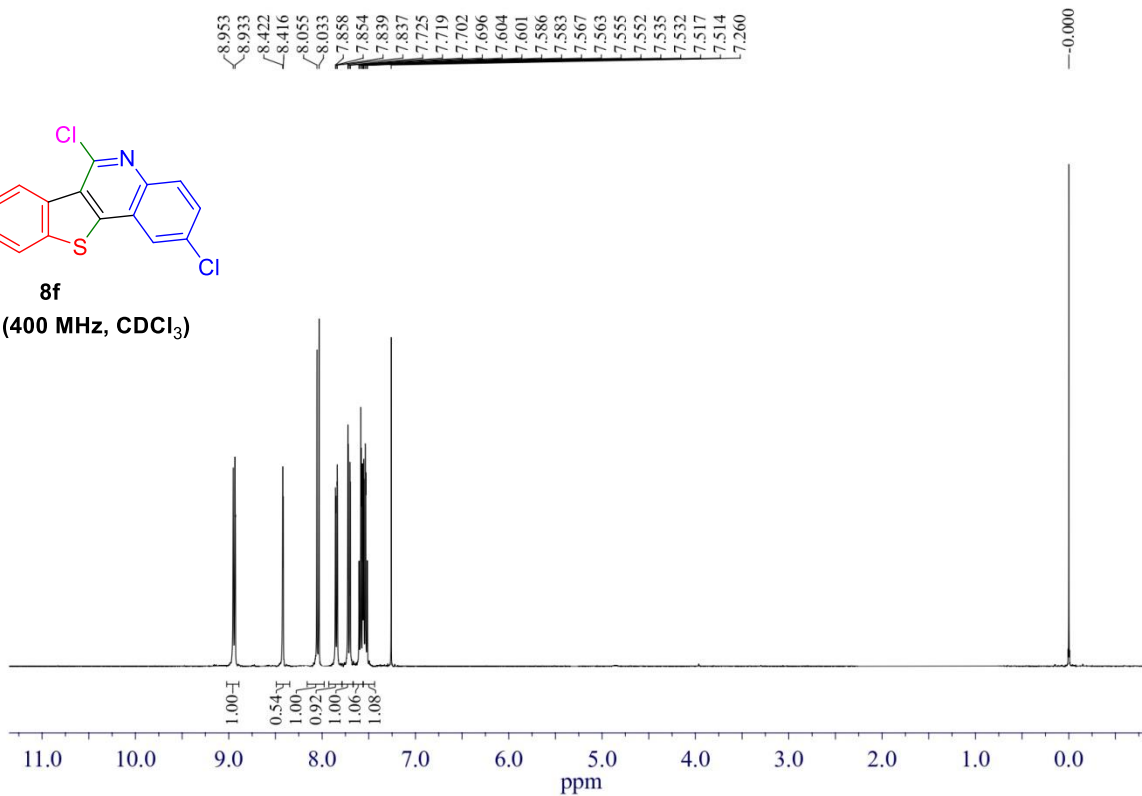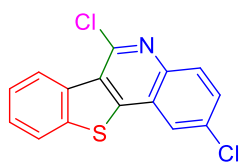

**8f**

$^{13}\text{C NMR}$  (100 MHz,  $\text{CDCl}_3$ )

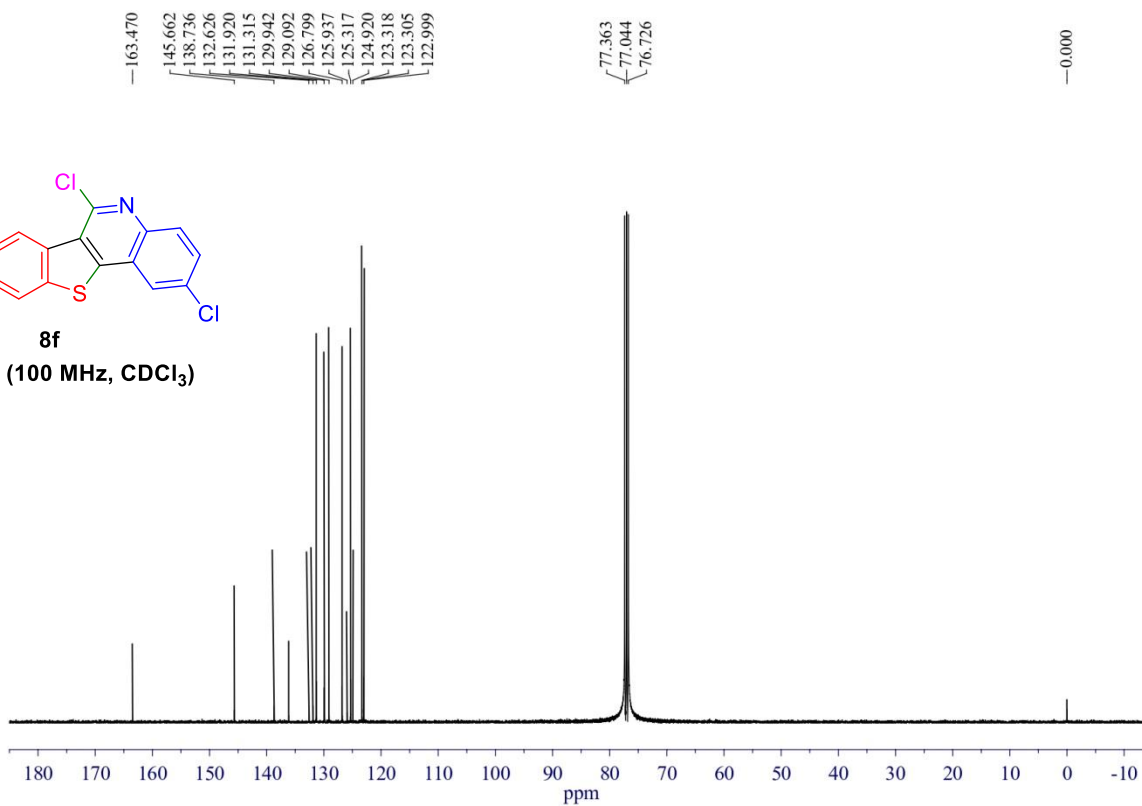

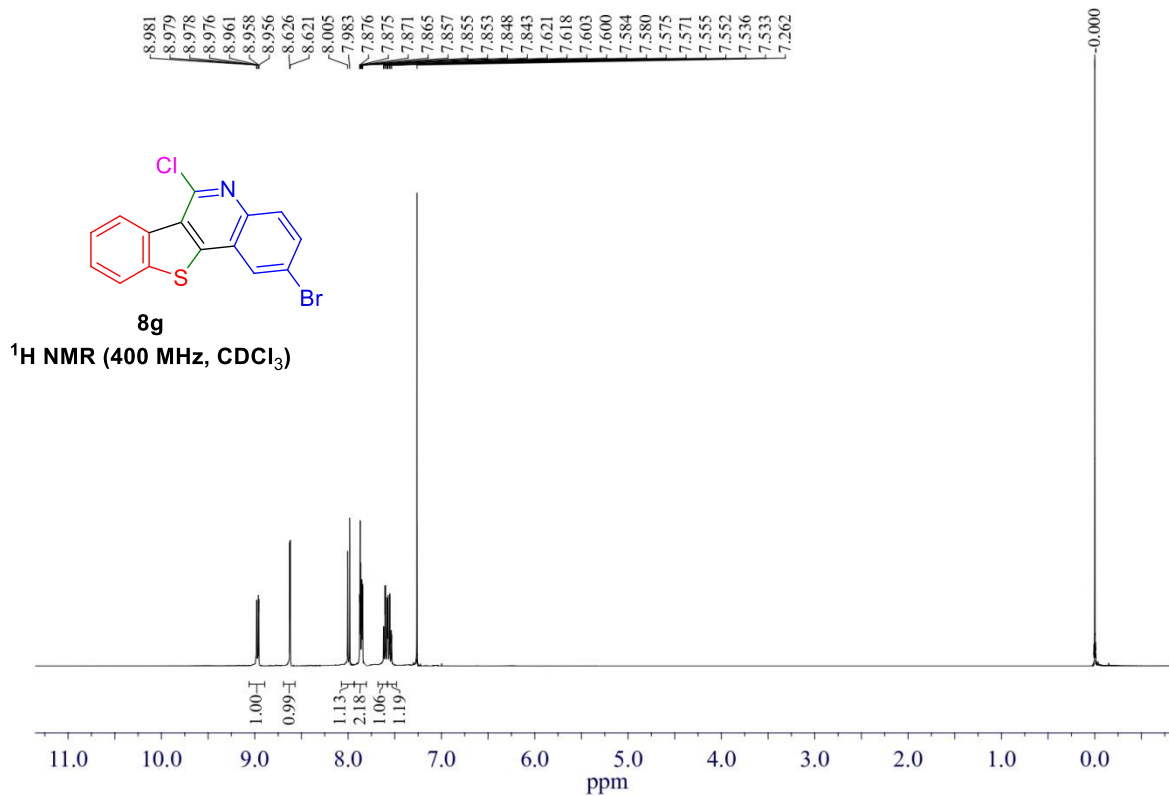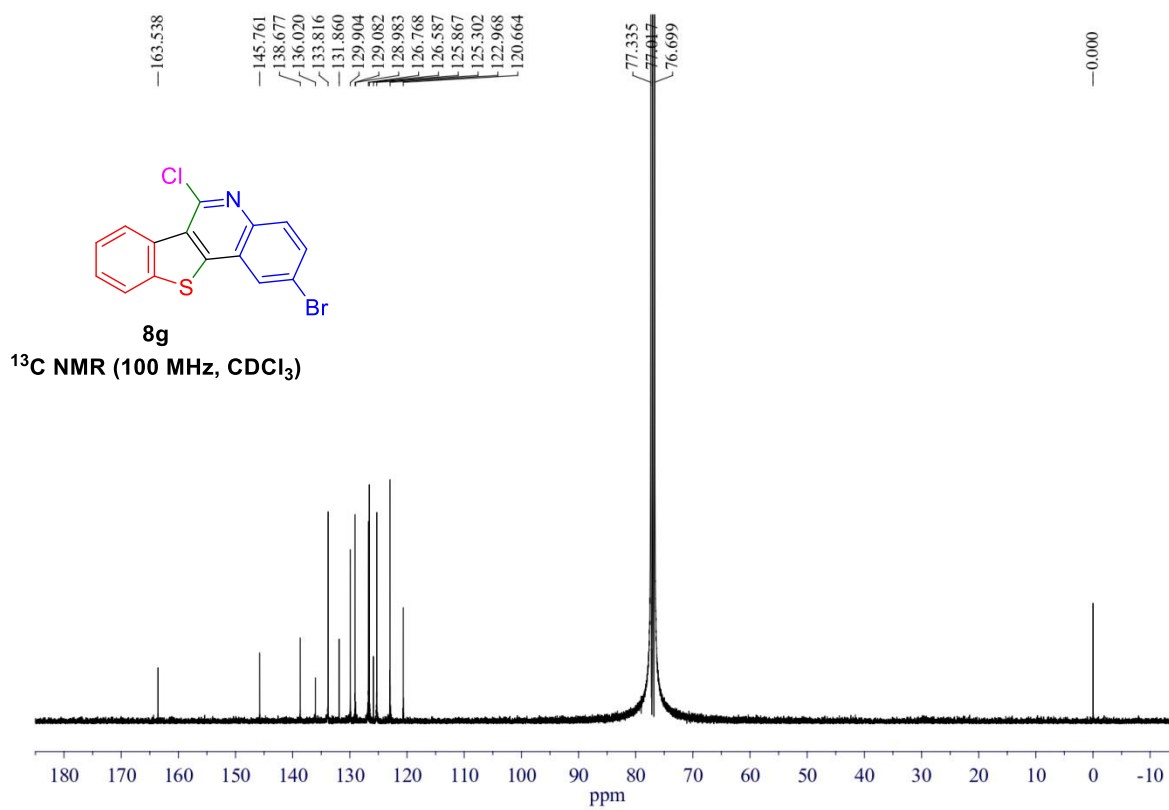

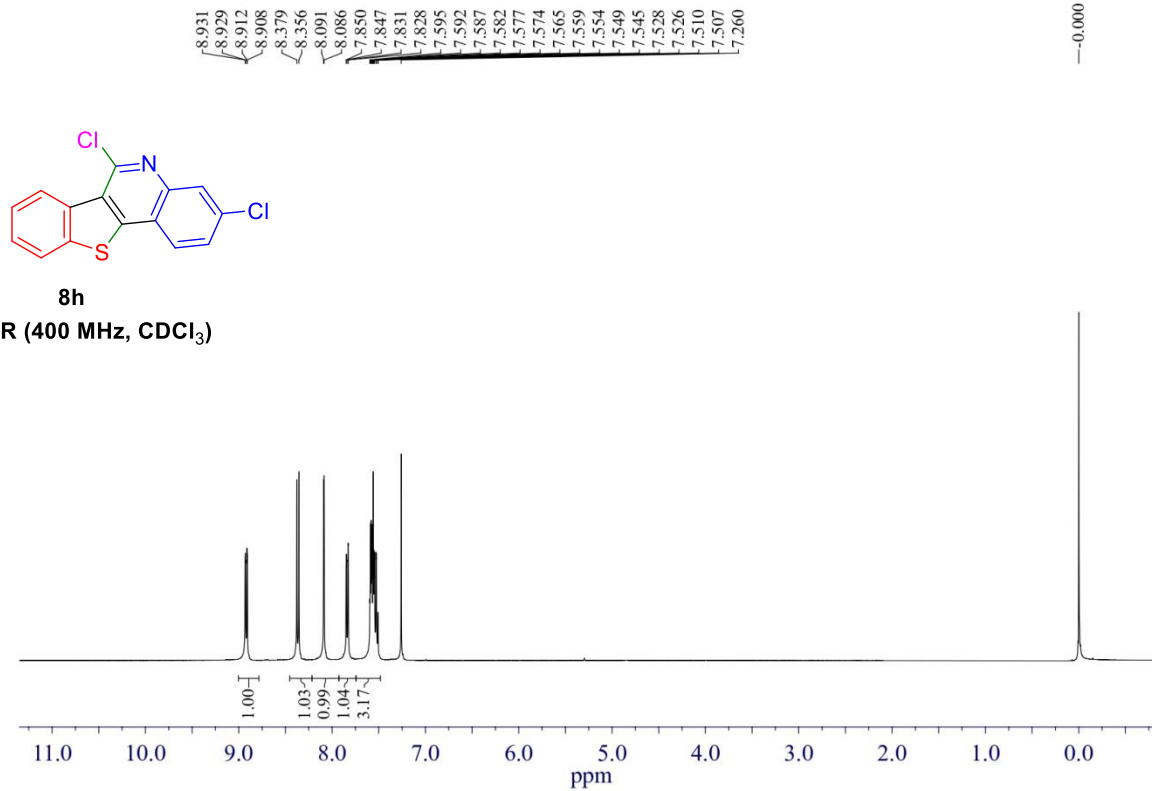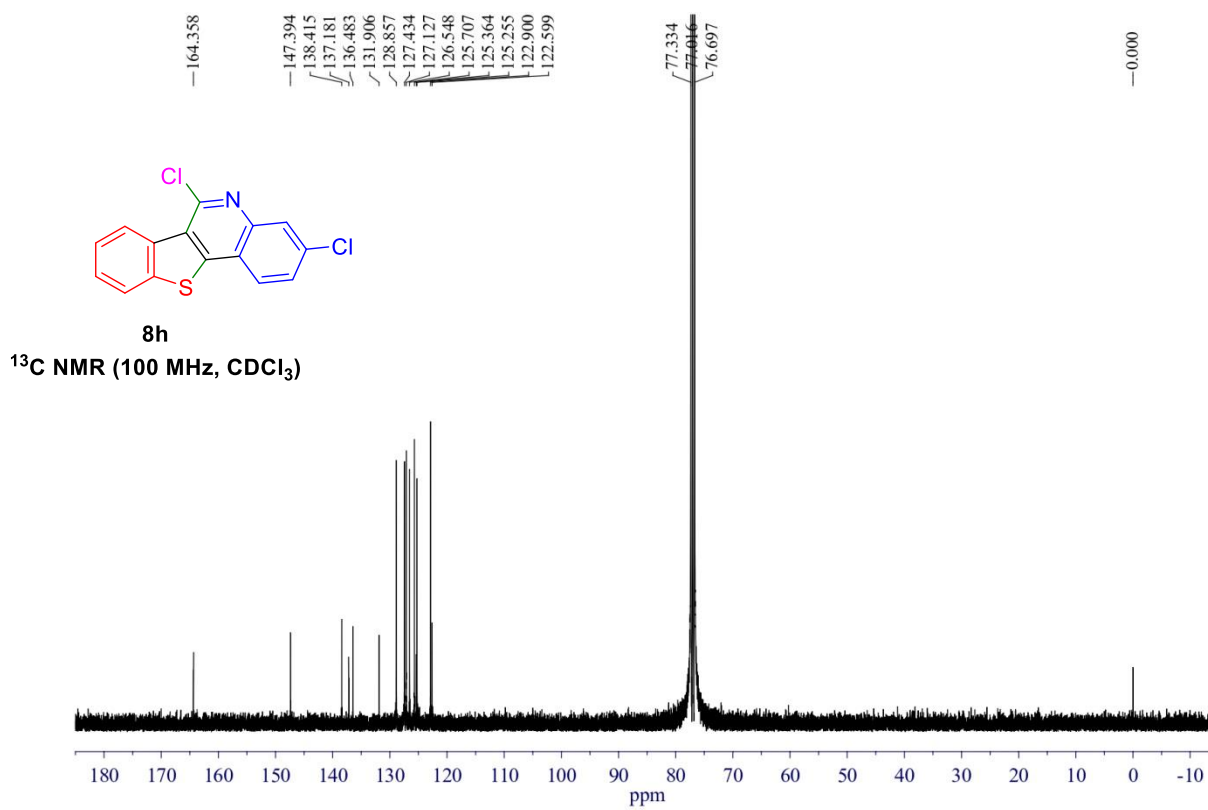

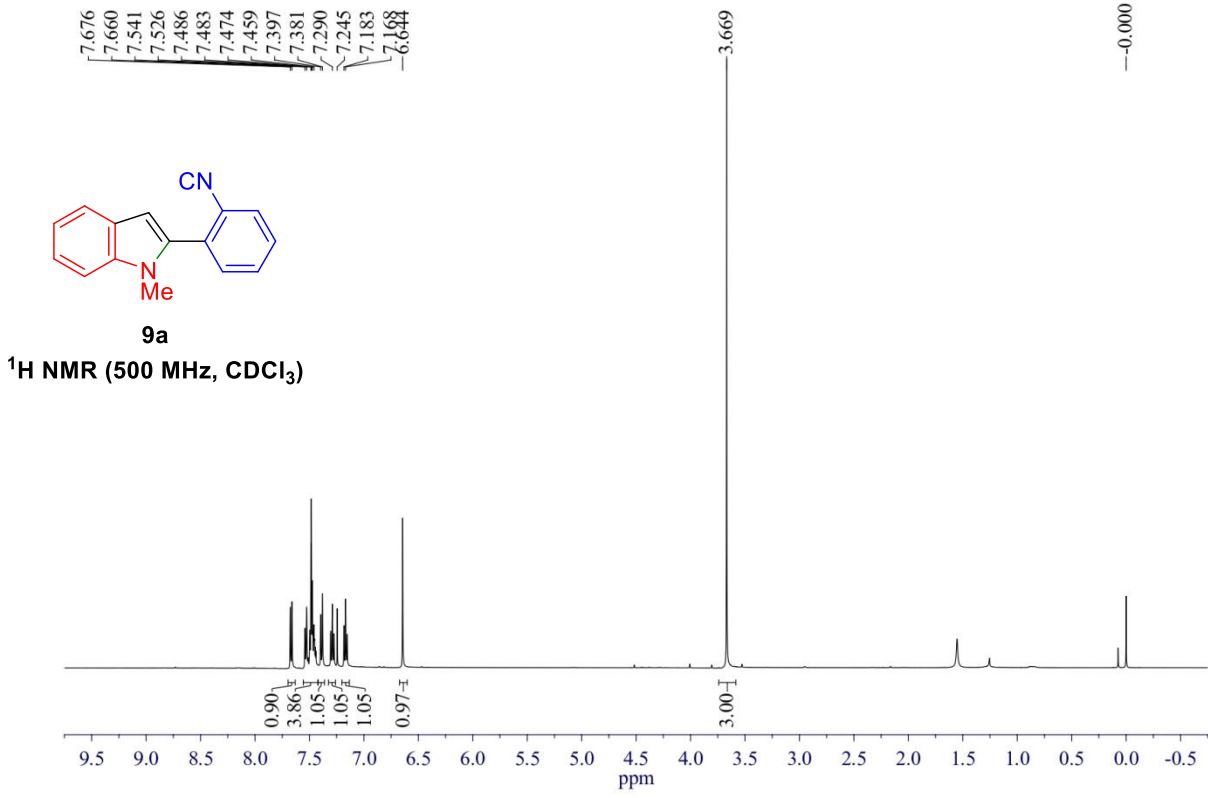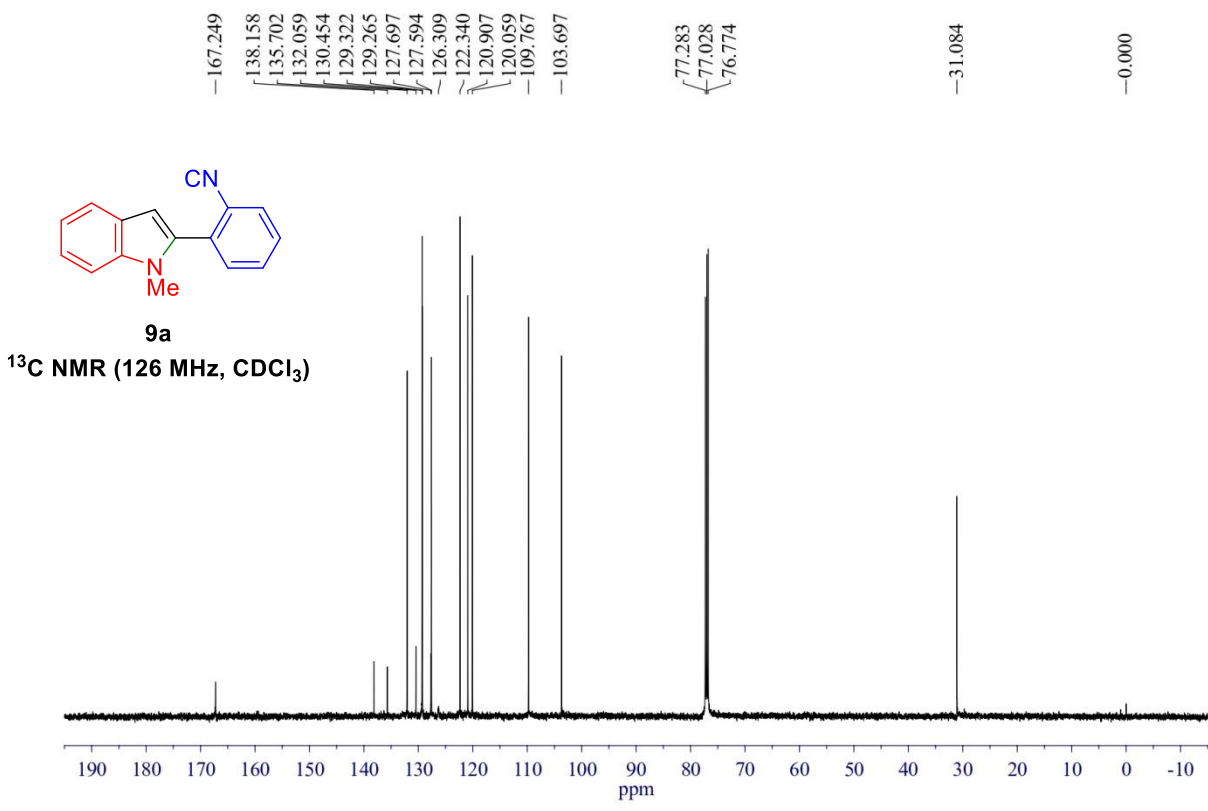

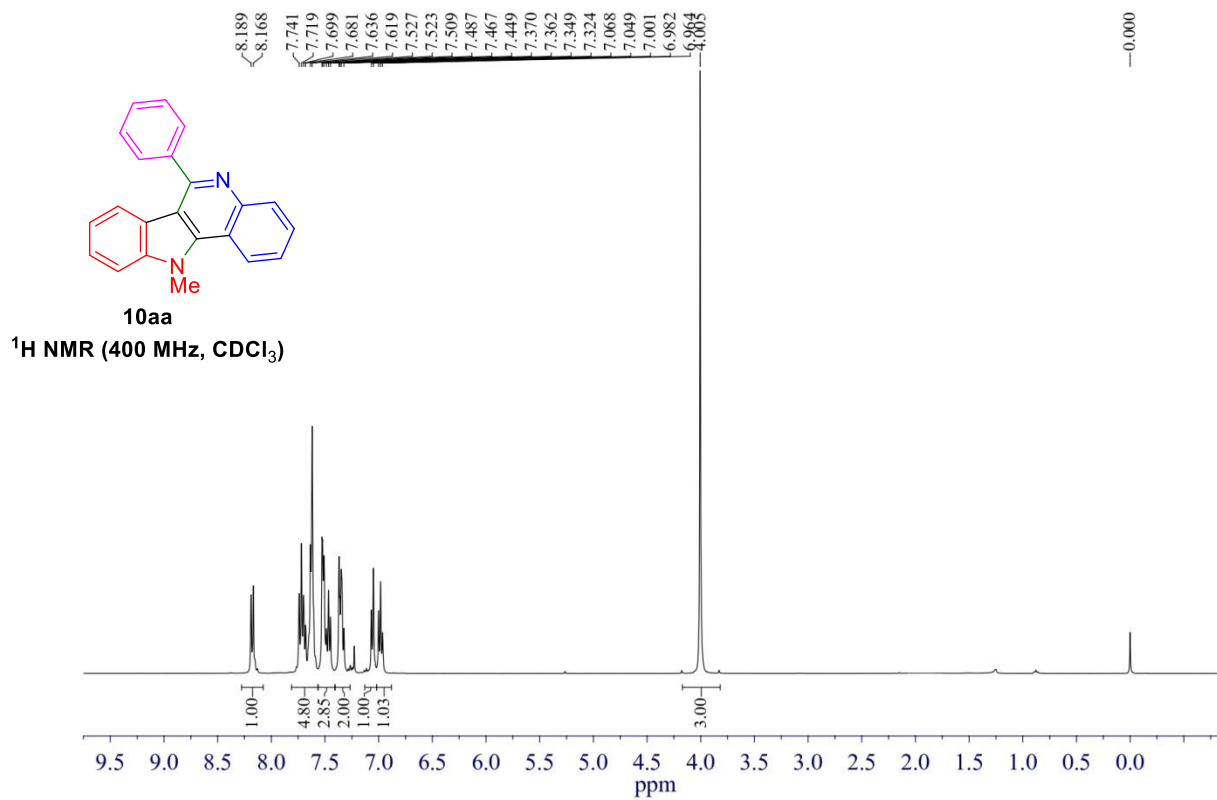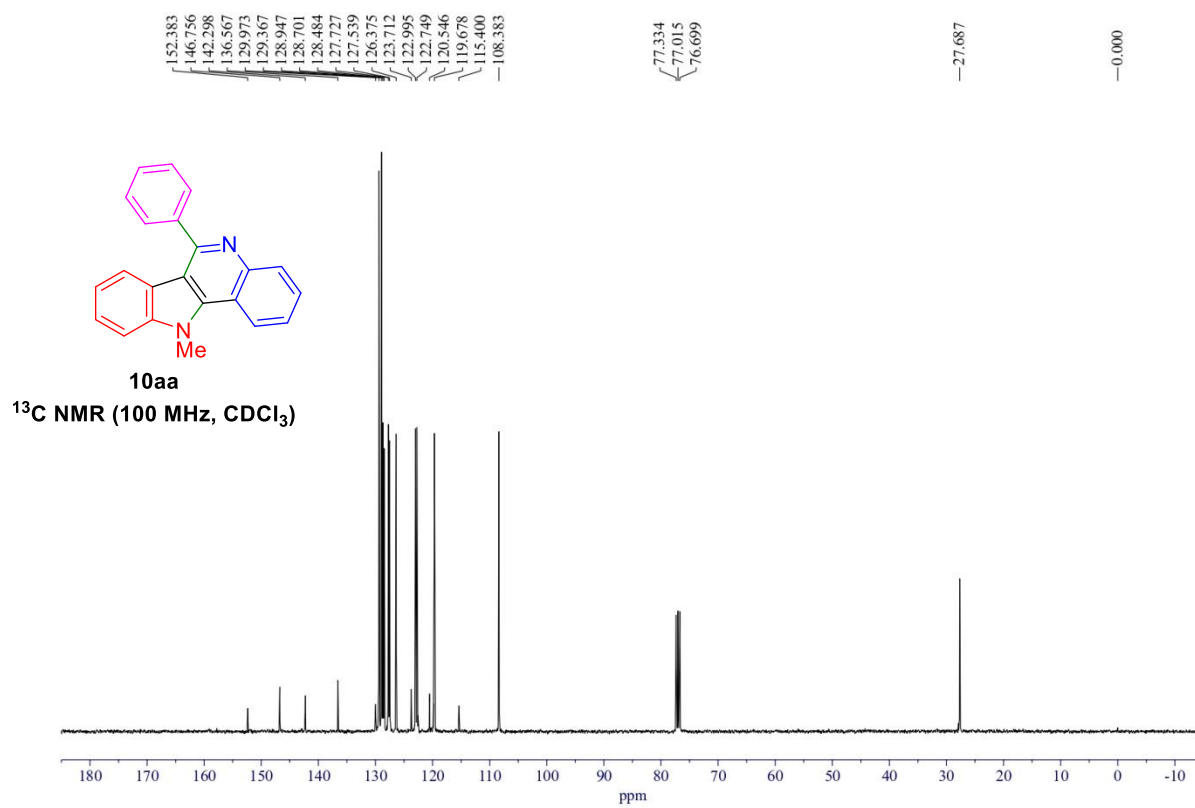

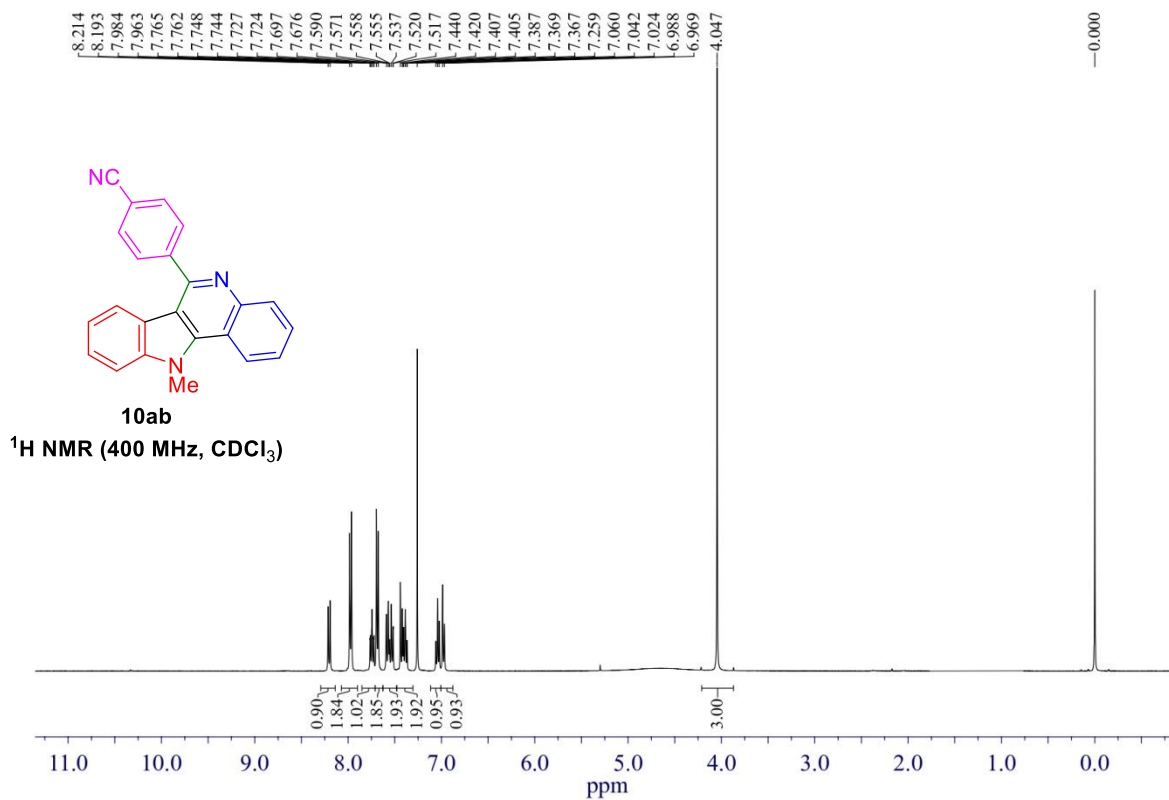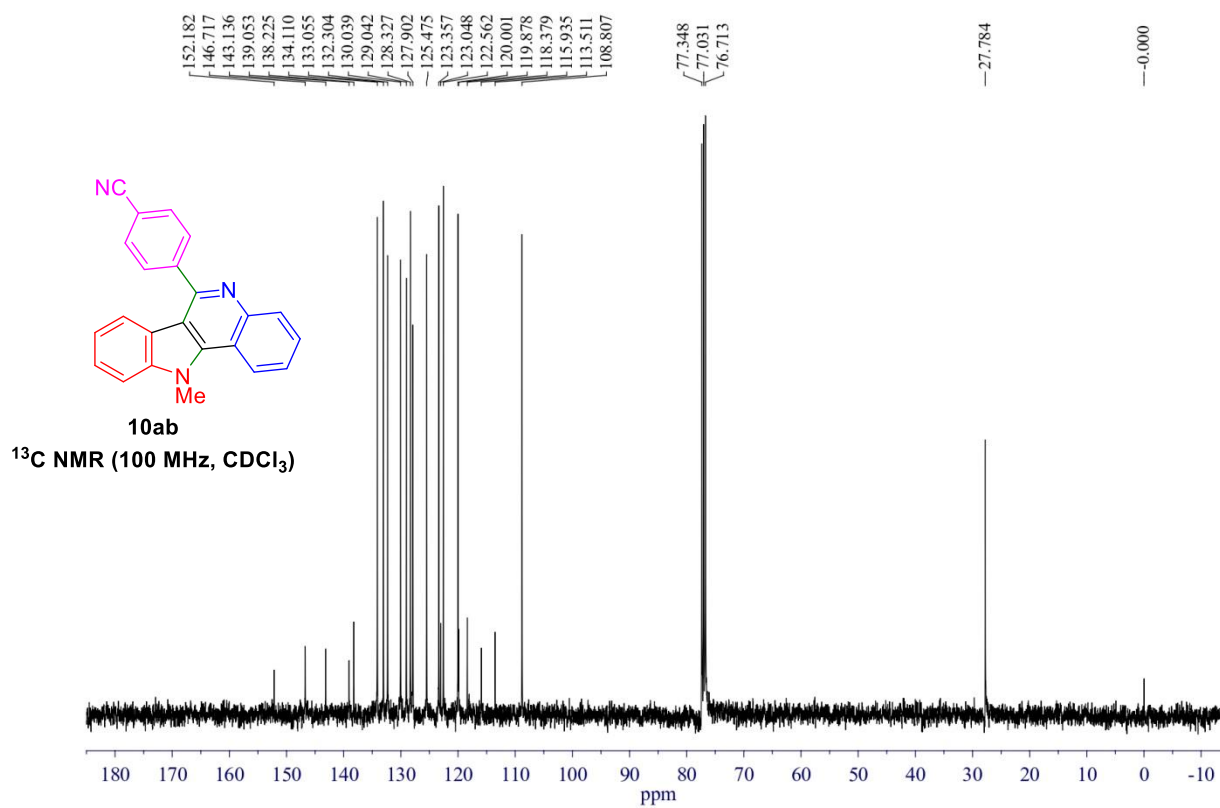



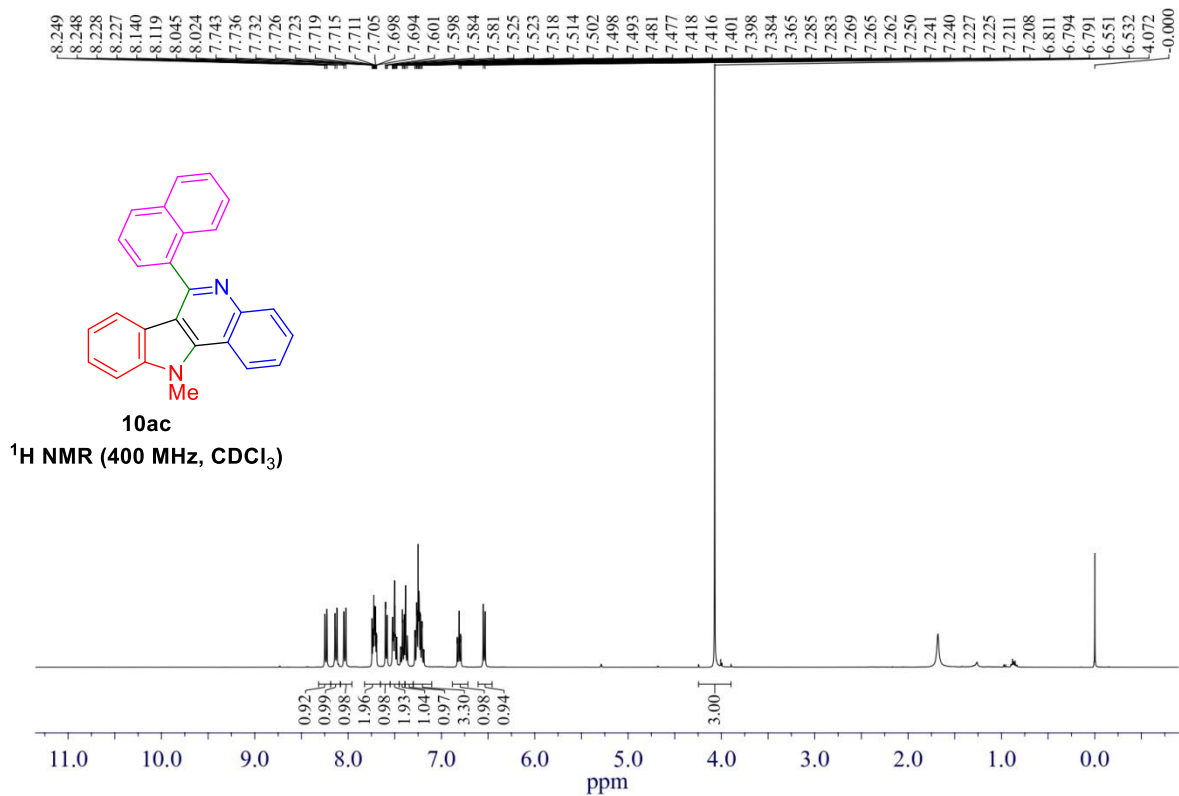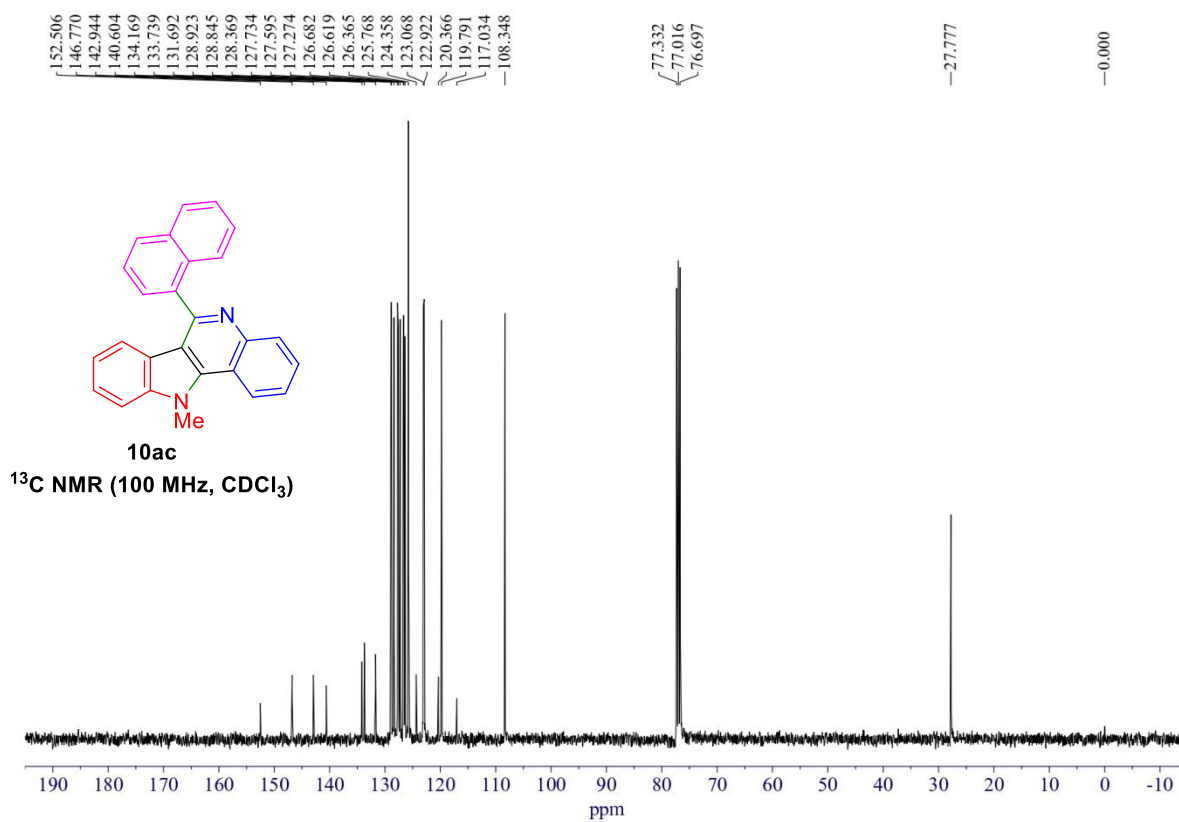

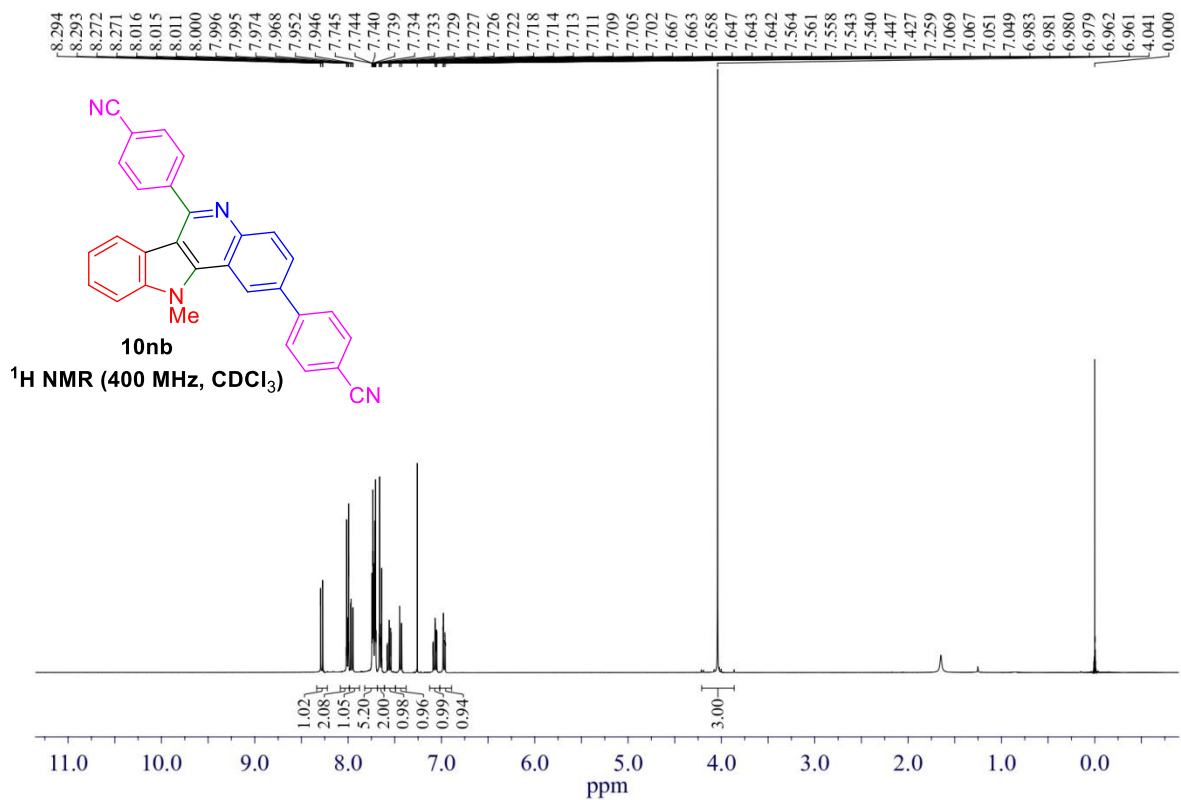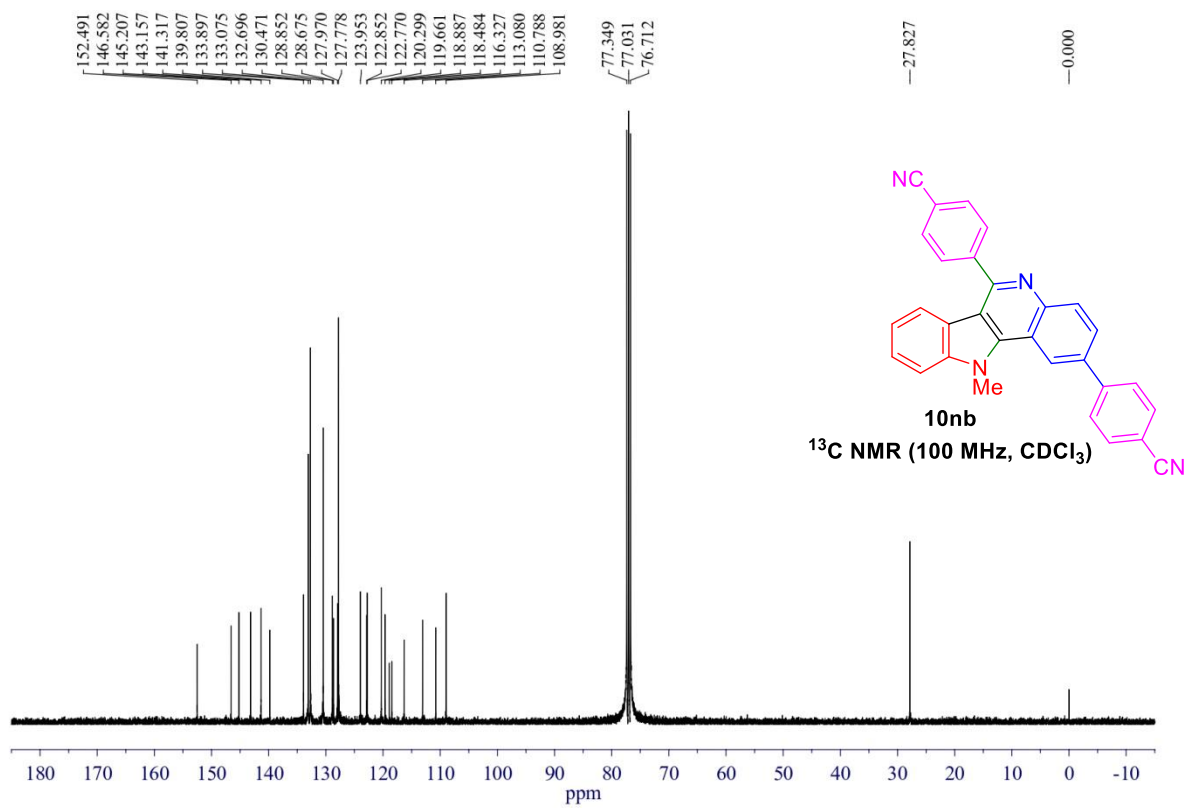

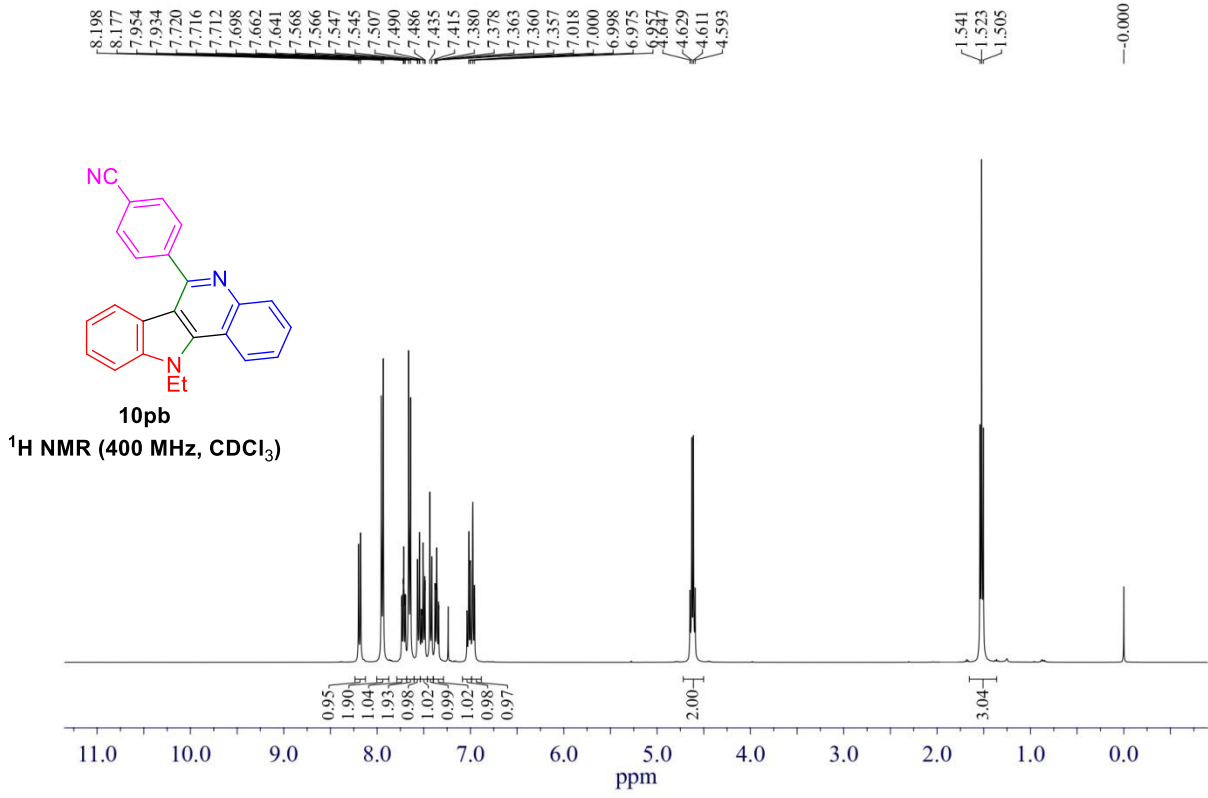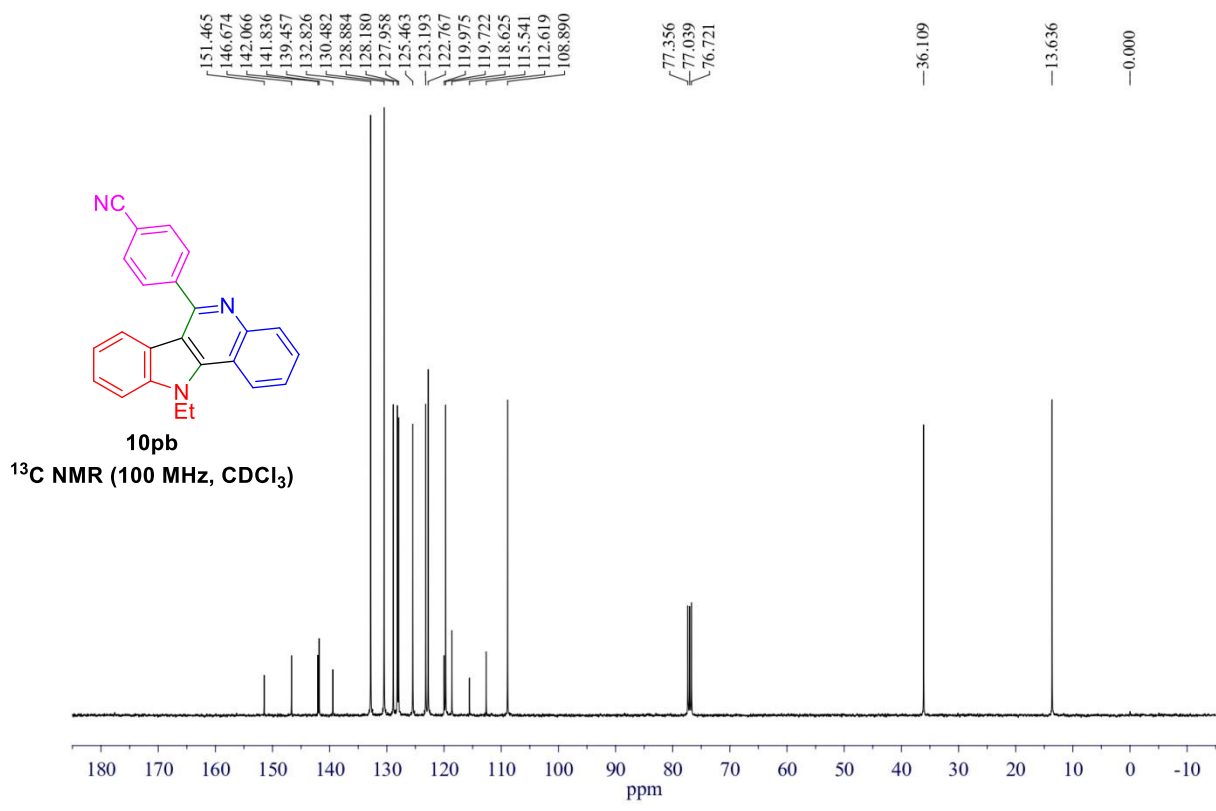

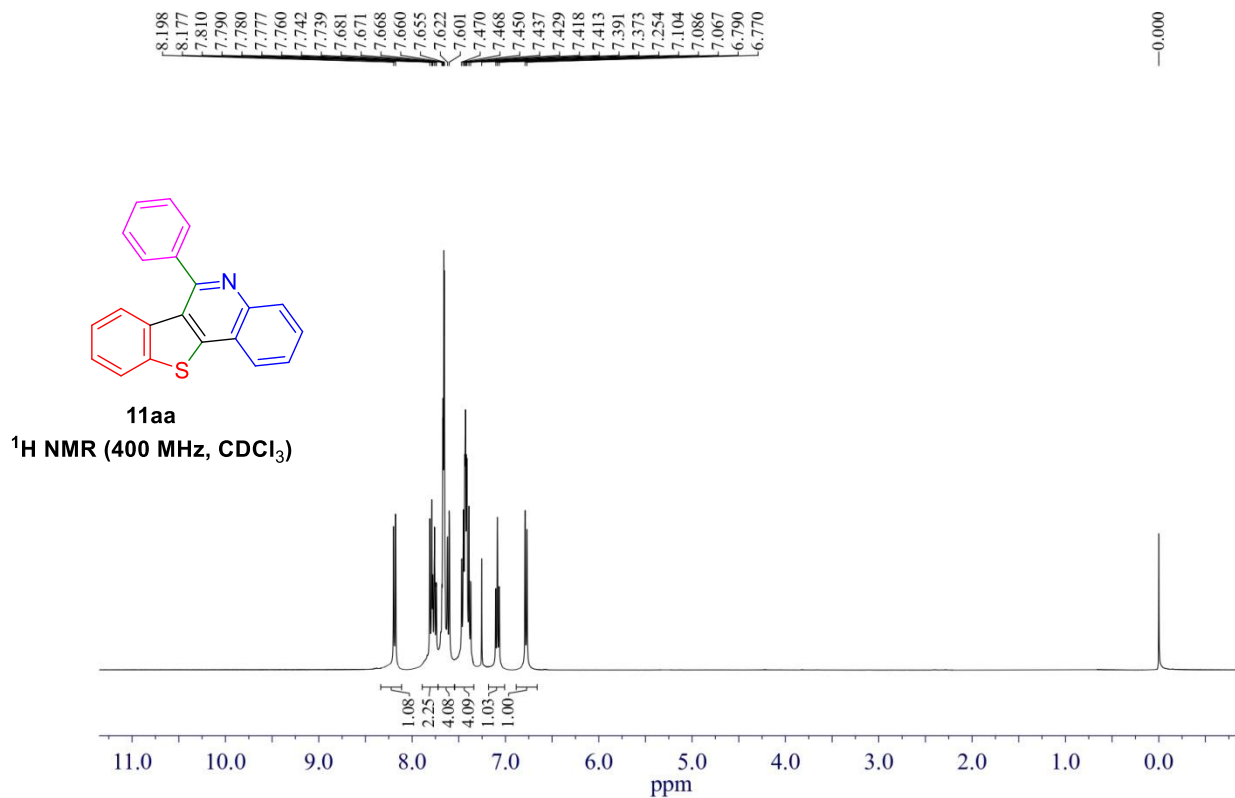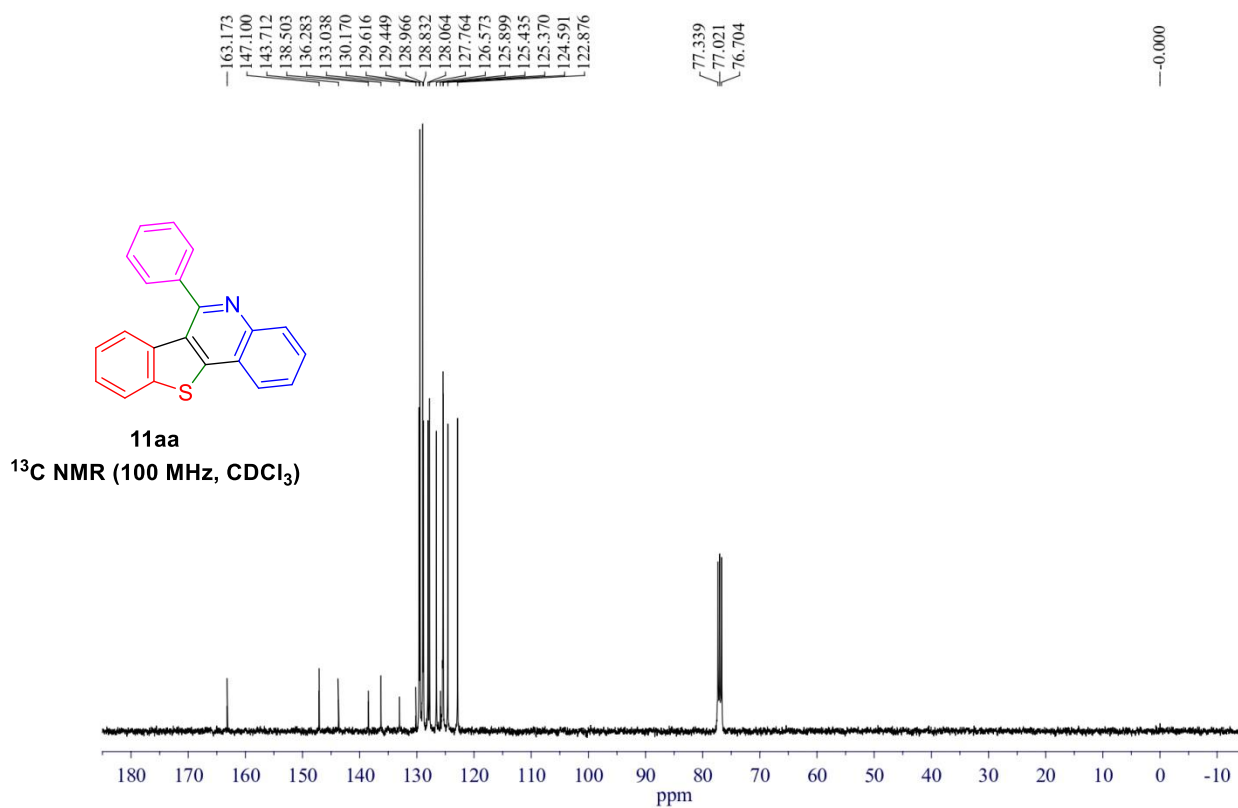

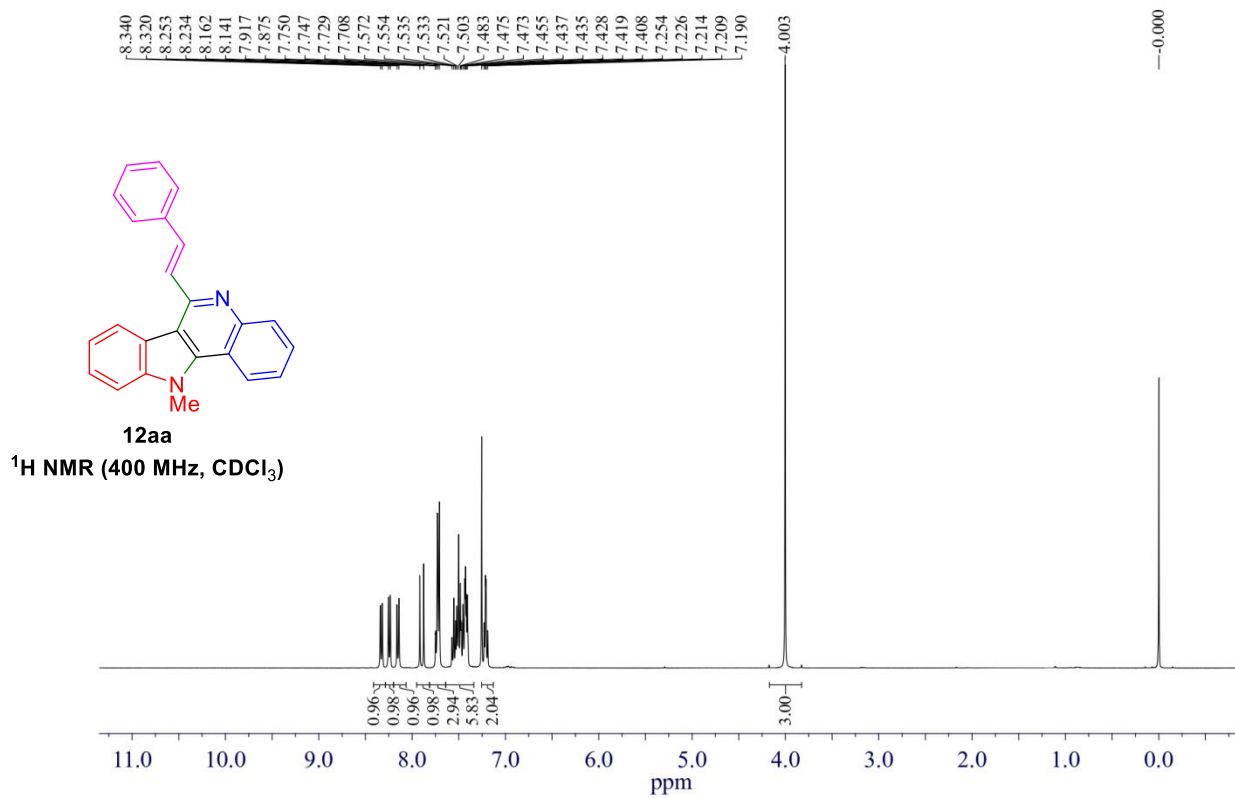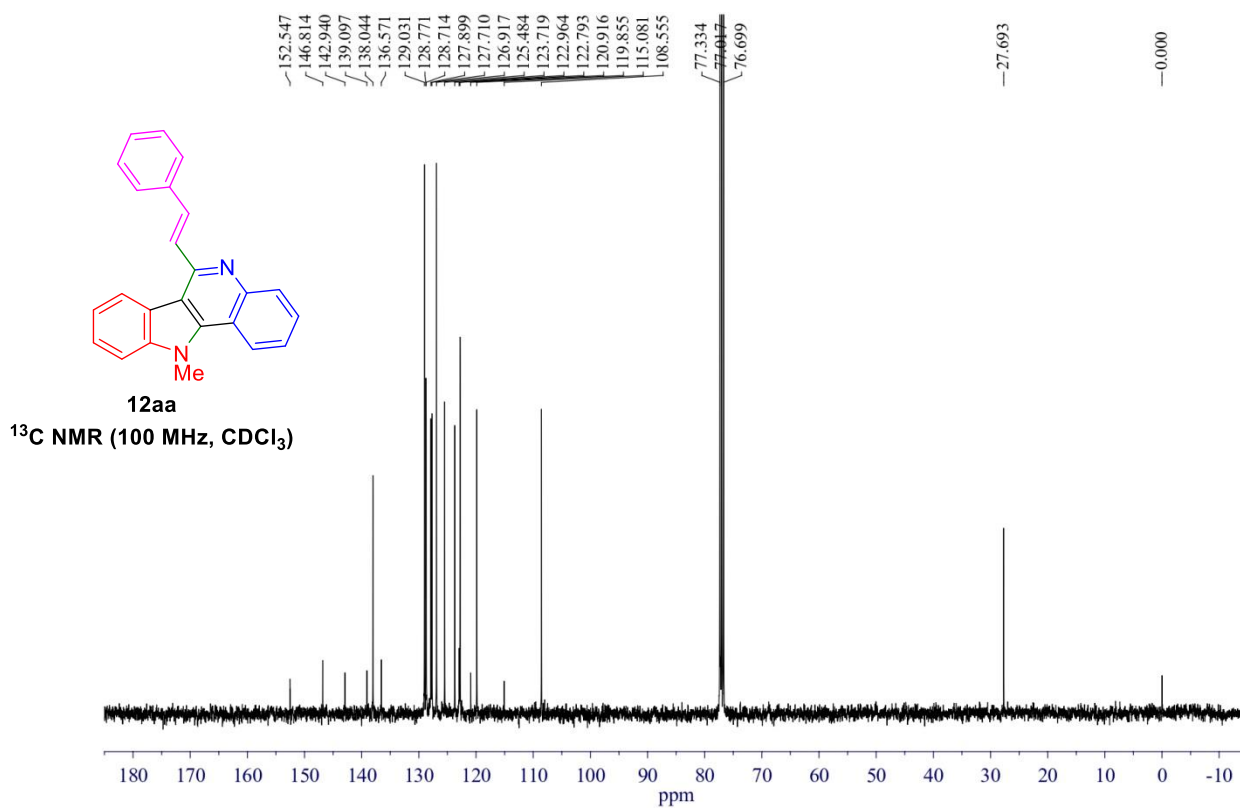

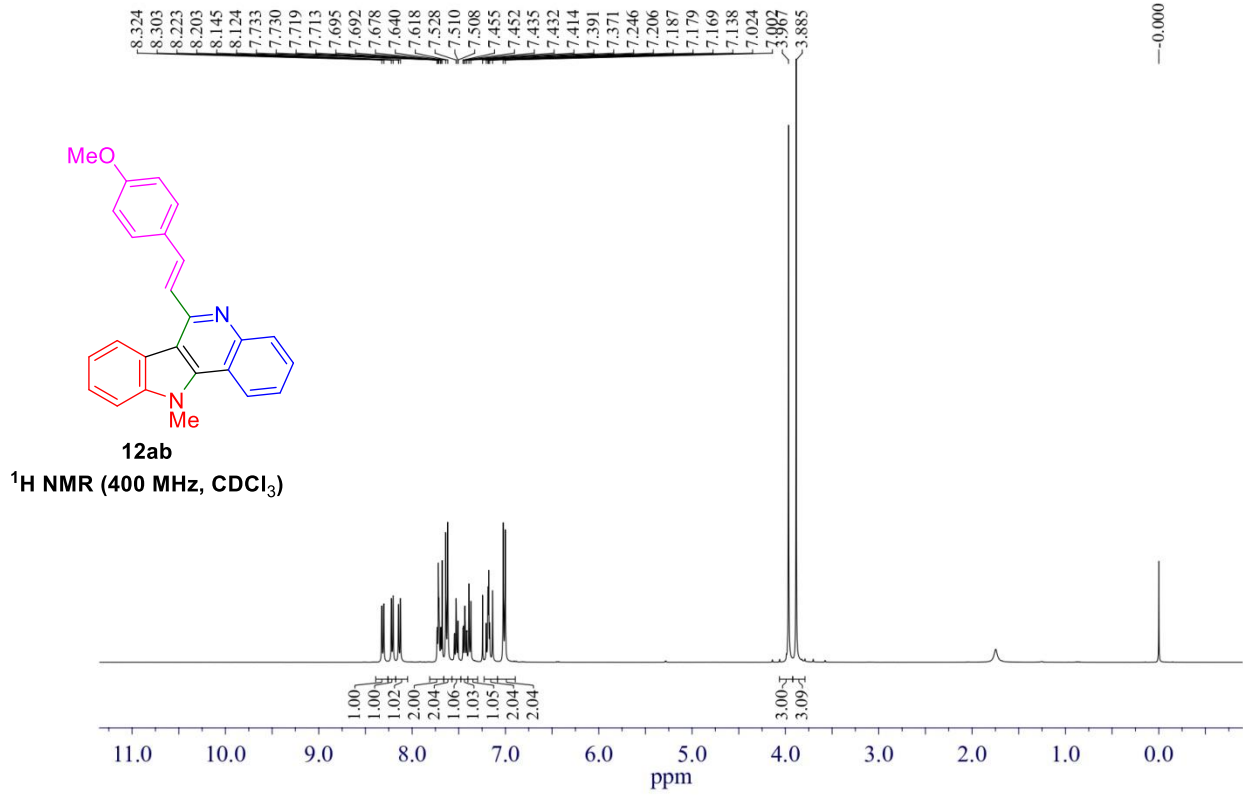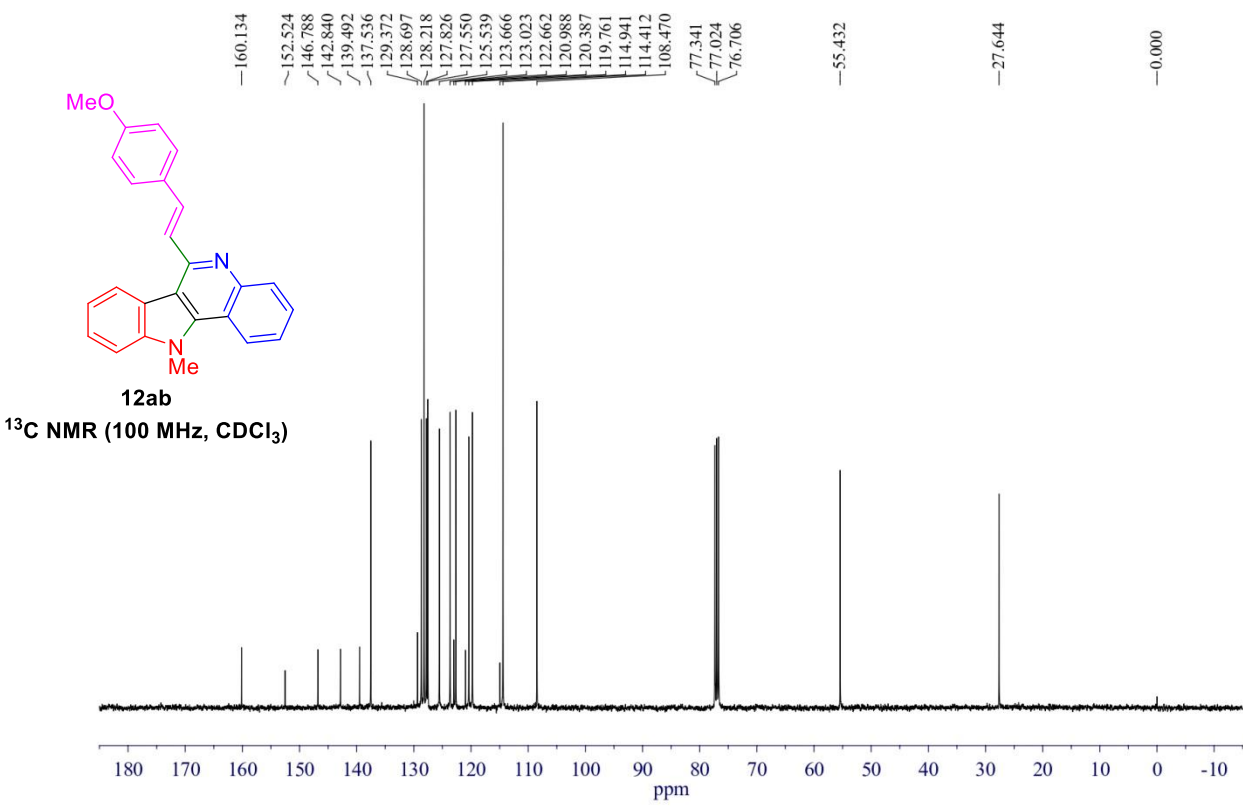

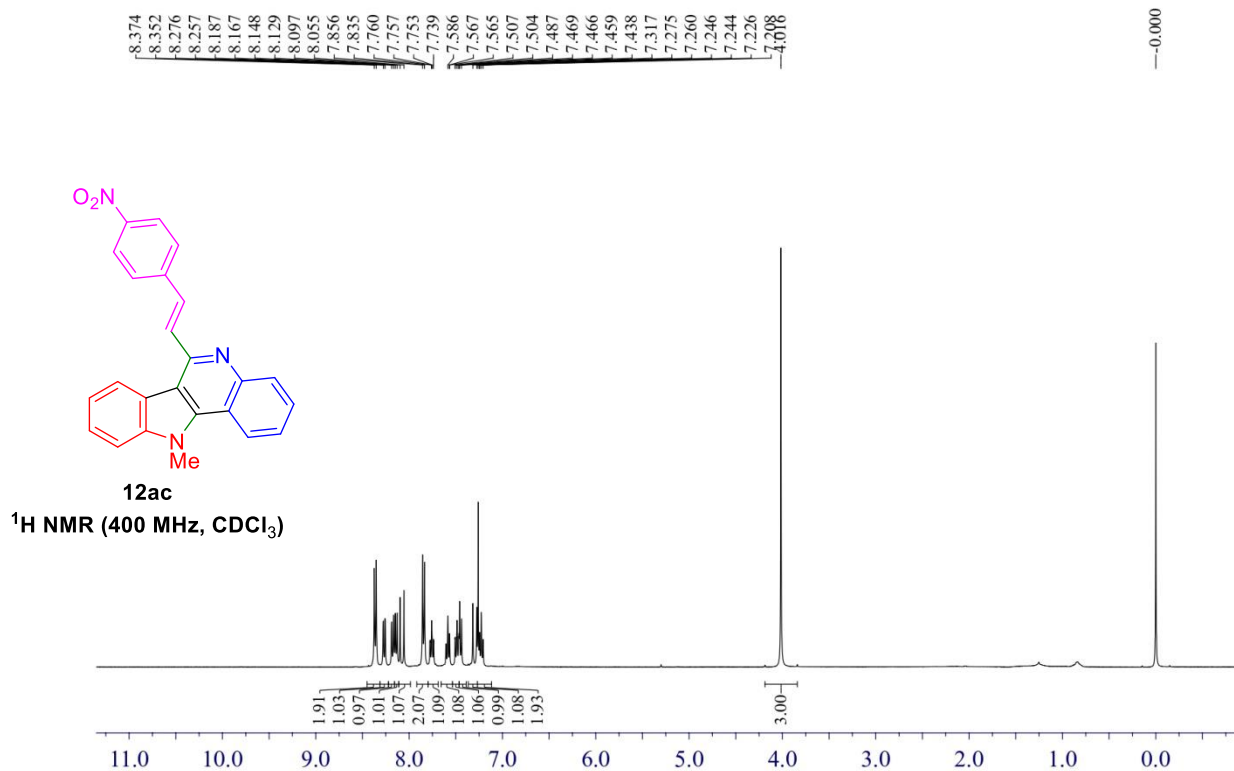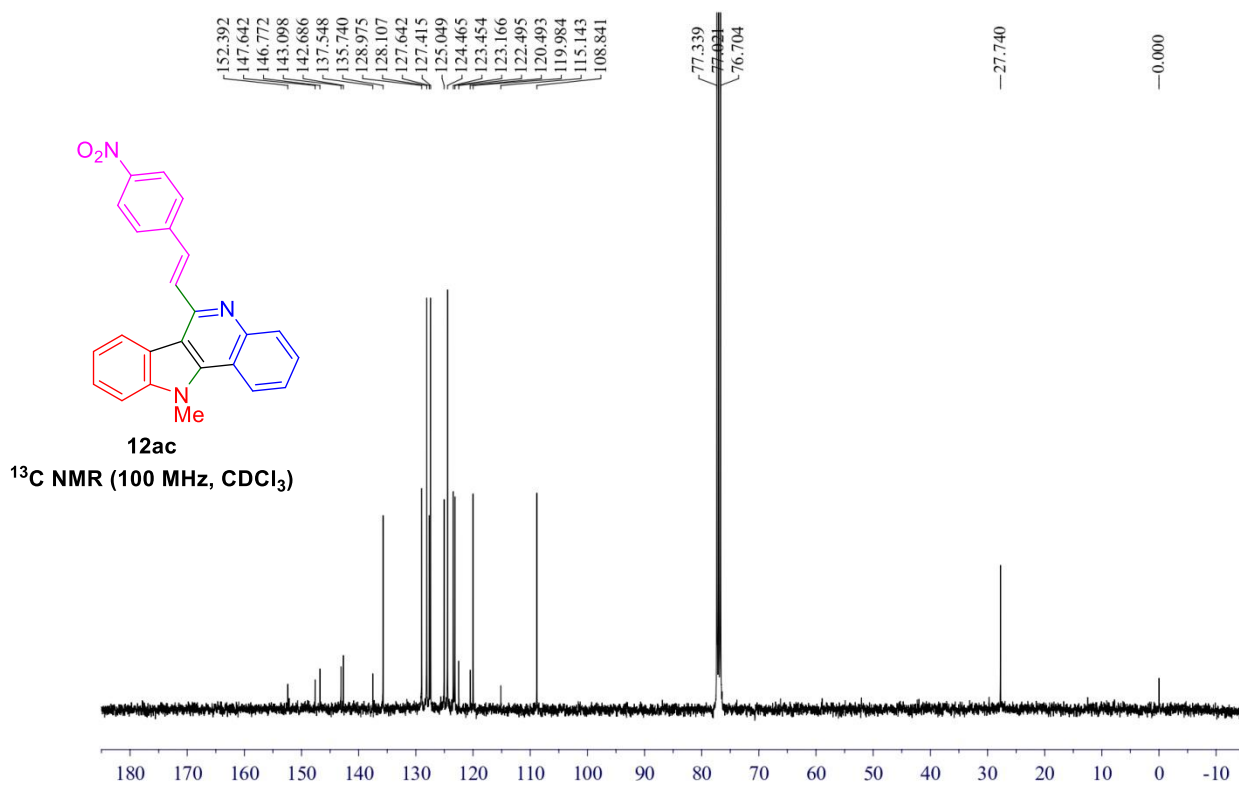

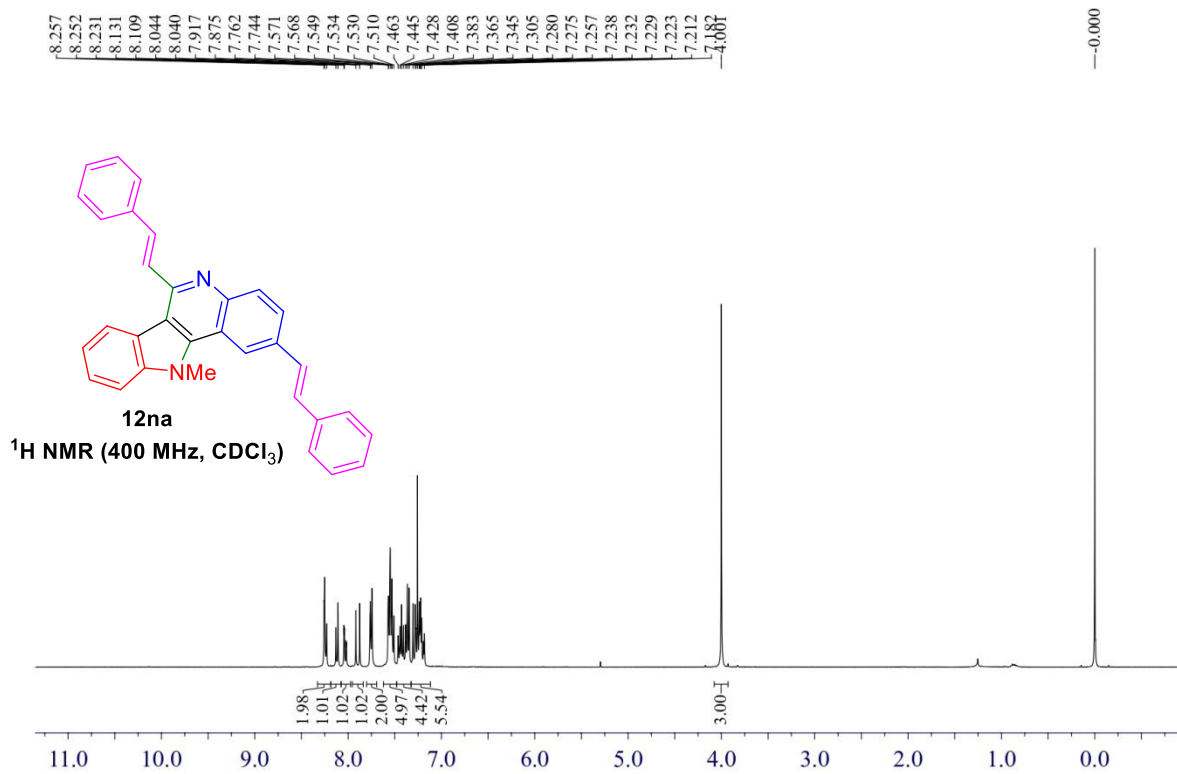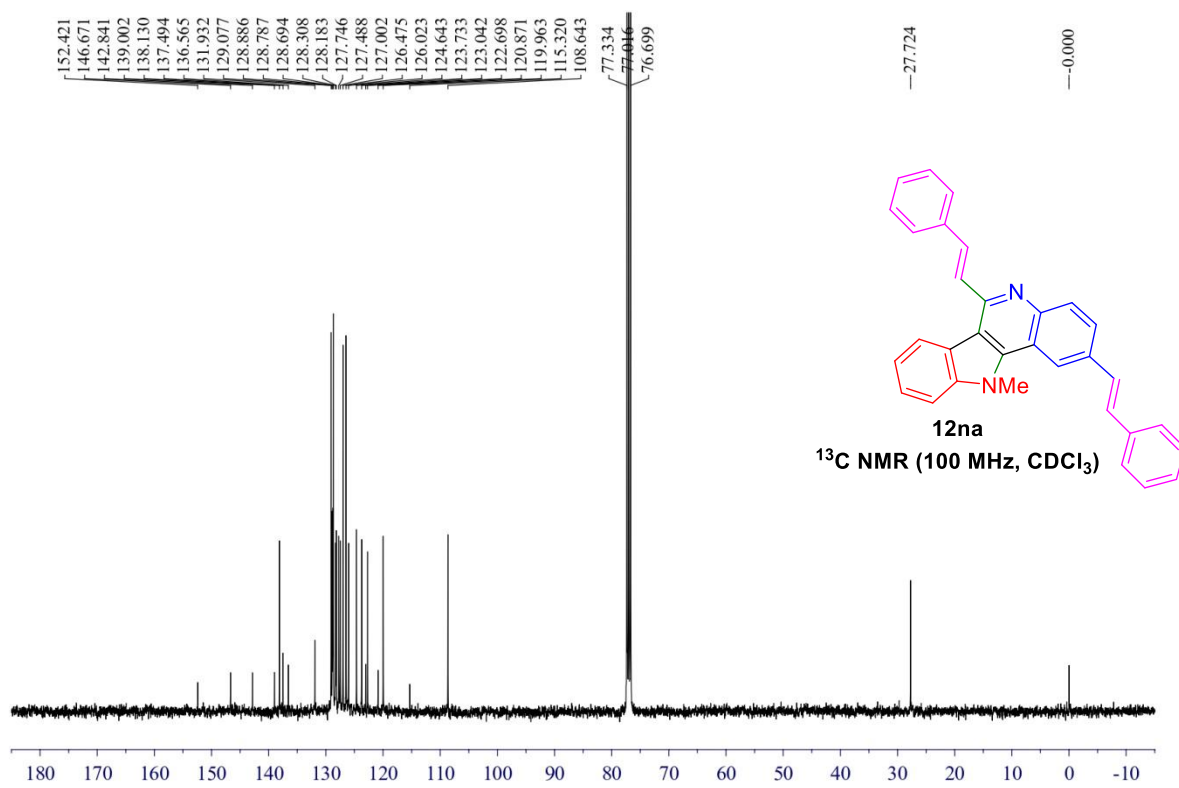



**13a**  
<sup>1</sup>H NMR (400 MHz, CDCl<sub>3</sub>)

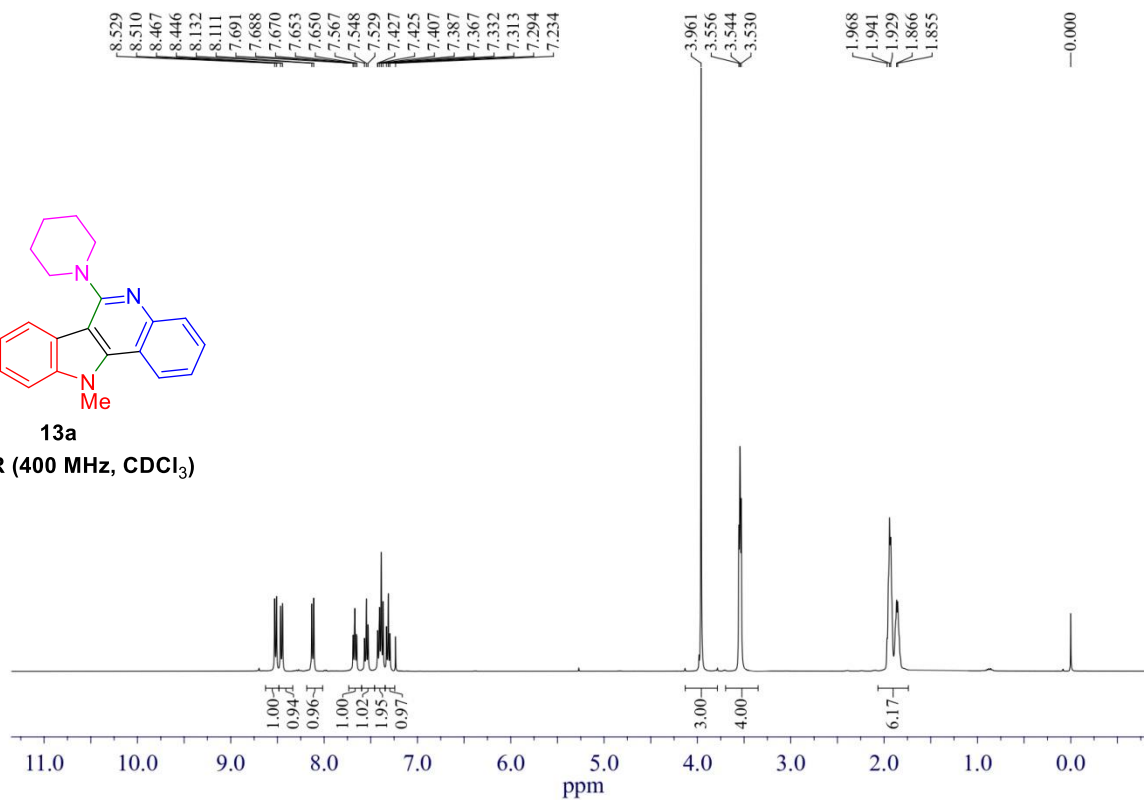

**13a**  
<sup>13</sup>C NMR (100 MHz, CDCl<sub>3</sub>)

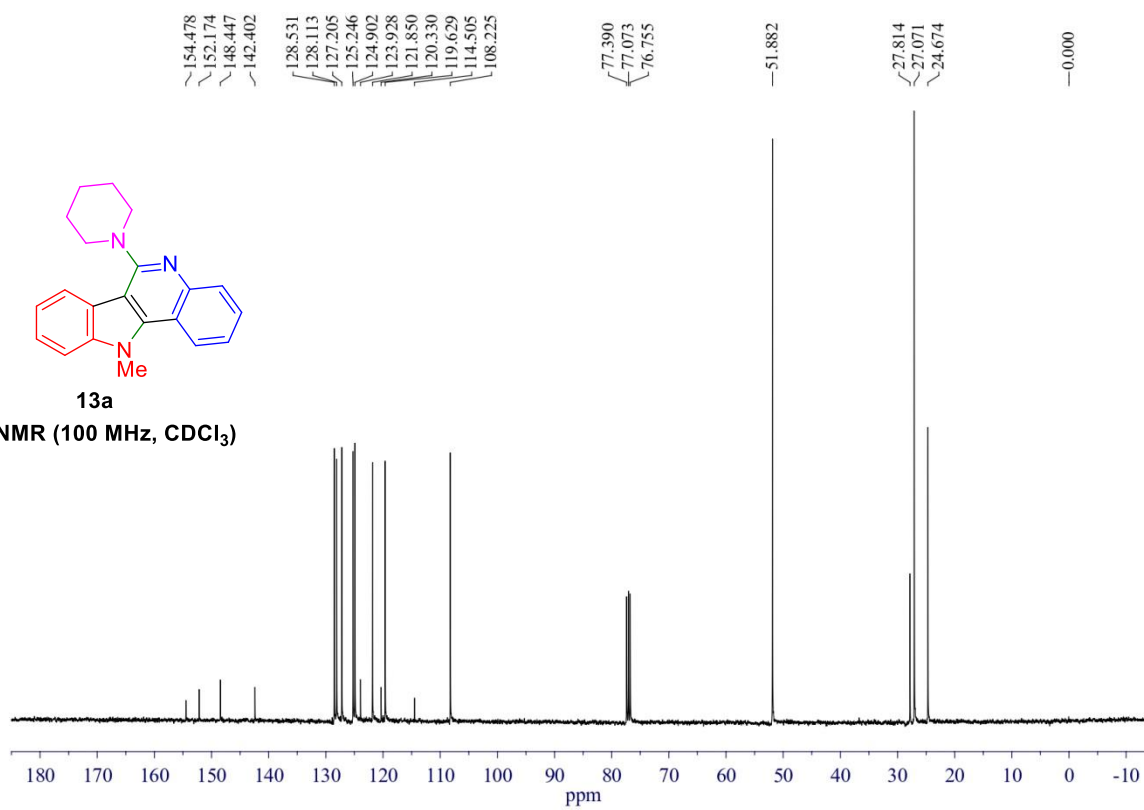

Supplement: d2nj02791g1.pdf [file d2nj02791g1.pdf]
